# Supplementary material for: A comprehensive review of randomized clinical trials in three medical journals reveals 396 medical reversals
Source: eLife. 2019 Jun 11;8:e45183. doi: 10.7554/eLife.45183 (PMC6559784; doi:10.7554/eLife.45183)
Supplement: Supplementary file 2. [file elife-45183-supp2.docx]

Supplementary File 2: Reversal summaries identified in the top medical journals, by journal

|  | **Article and Author** | **Primary Medical Discipline** | **Date and Journal** | **Summary** | **Systematic Review** | **Search terms** |
| --- | --- | --- | --- | --- | --- | --- |
| 1 | Effectiveness of household lockable pesticide storage to reduce pesticide self-poisoning in rural Asia: a community-based, cluster-randomised controlled trial Pearson et al. | Public Health and General Preventive Medicine | 10/21/2017  Lancet | In rural Asia, pesticide self-poisoning is a common health issue. Restricting access to pesticides has been previously shown to reduce both method-specific and all-cause suicide rates in certain Asian countries. 1 2 The WHO advocates the use of locked boxes for storing pesticides in farming areas.3 In this study, lockable storage containers for pesticides were compared to usual practice in households (27,091 households to lockable storage containers and 26,291 households without) in rural areas of Sri Lanka. Lockable storage containers did not reduce the risk of pesticide self-poisoning (293/100,000 vs. 318/100,000 for intervention and control groups, respectively; p=0.33). This is a reversal of lockable storage containers to reduce self-poisoning. | None found | lock box self-poisoning (with and without "preventing") |
| 2 | Family-led rehabilitation after stroke in India (ATTEND): a randomised controlled trial ATTEND Collaborative Group; Lindley et al. | Neurology/Neurosurgery | 8/5/2017  Lancet | In low- to middle-income countries, community rehabilitation is thought of as a viable health-care delivery method to reduce disability. Results from multiple studies, included systematic reviews of early supported discharge (ESD) stroke services, have concluded that this type of rehabilitation can reduce death or dependency without placing adverse burden on family caregivers.4 The ATTEND trial found that family-led stroke rehabilitation in addition to routine rehabilitation did not reduce rates of death or dependency at six months, compared to routine rehabilitation, among patients (n=623 for the intervention group and 627 for the control group) who had a stroke within the past month and residual disability. The proportion of death or dependence was 47% (p=0.87) in both groups, suggesting that extra time and resources to implement a family-led rehabilitation program after stroke is not beneficial, and thus this practice is a reversal. | 2014. Cochrane review. “There is very low- to moderate-quality evidence that CME [caregiver-mediated exercises] may be a valuable intervention to augment the pallet of therapeutic options for stroke rehabilitation.”4 This review did not include this RCT, and “included studies were small, heterogeneous, and some trials had an unclear or high risk of bias.” | family led stroke rehabilitation |
| 3 | Intraoperative ketamine for prevention of postoperative delirium or pain after major surgery in older adults: an international, multicentre, double-blind, randomised clinical trial Avidan et al. | Anesthesiology | 7/15/2017  Lancet | Delirium and pain can often be co-occurring conditions in elderly people who have recently undergone surgery. Low-dose intraoperative ketamine has been associated with improved cognition after cardiac surgery and reduced pain, and it has been used by anesthesiologists around the world for over 50 years.5 In this study, ketamine did not decrease delirium in older adults after major surgery (19.4%; n=223 high-dose; n=227 in low-dose group), compared to placebo (19.8%; p=0.92; n=222), and even increased negative experiences such as hallucinations (p=0.01) and nightmares (p=0.03). This is a reversal of the practice of intraoperative ketamine for postoperative delirium or pain. | 2015. “Moderate to high-quality evidence supports the use of pharmacologic agents for the prevention of delirium, but results are based largely on one randomized controlled trial. The evidence for treating postcardiac surgery delirium with pharmacologic agents is inconclusive.”6 The study that carried most of the weight used dexamethasone in the intervention group. Only one included study in the meta-analysis had a ketamine intervention, and this study only included 58 men, which is far less than the 672 patients included in the Lancet study. | ketamine post-operative delirium |
| 4 | Prophylactic platelet transfusion plus supportive care versus supportive care alone in adults with dengue and thrombocytopenia: a multicentre, open-label, randomised, superiority trial Lye et al. | Infectious Disease | 4/22/2017  Lancet | Dengue is the most common vector-borne infection worldwide and is often associated with thrombocytopenia.7 Because of this, prophylactic platelet transfusion is often used, even though there has been no research investigating its efficacy and is sometimes not recommended.8 9 Results from this trial found that prophylactic platelet transfusion was no better than supportive care in preventing bleeding in those with dengue and thrombocytopenia (21% in platelet group vs. 26% in control group; RR=0.82; 95% CI=0.56-1.17; p=0.16; n=188 for transfusion and n=184 for the control group) and may even lead to adverse events, such as urticaria, other types of rashes, pruritus, chest pain, and anaphylaxis. This is a reversal of the practice of prophylactic platelet transfusion in patients with dengue and thrombocytopenia. | None found | Prophylactic platelet transfusion dengue |
| 5 | Post-deployment screening for mental disorders and tailored advice about help-seeking in the UK military: a cluster randomised controlled trial Rona et al. | Psychiatry | 4/8/2017  Lancet | A higher prevalence of mental health problems, including psychological distress and alcohol misuse, has been observed in personnel in direct combat roles deployed to Iraq and Afghanistan. To help in monitoring personnel, the US Armed Forces has implemented a post-deployment screening program for mental disorders.10 Canada, Australia, and the Netherlands also have post-deployment screening procedures for mental disorders.11 12 However, in this study, post-deployment screening with tailored help-seeking advice for mental disorders was no more effective at reducing prevalence of mental health disorders than receiving screening with general mental health advice (post-traumatic stress disorder OR=0.92; 95% CI=0.75-1.14; depression or anxiety OR=0.91; 95% CI=0.71-1.16; n=6350 in the screening group and n=3840 in the control group), nor did it increase help seeking for mental disorders (OR=0.92; 95% CI=0.78-1.08). This is a reversal of the practice of post-deployment screening for mental disorders. | None found | Post-deployment screening for mental disorders |
| 6 | Prophylactic hydration to protect renal function from intravascular iodinated contrast material in patients at high risk of contrast-induced nephropathy (AMACING): a prospective, randomised, phase 3, controlled, open-label, non-inferiority trial Nijssen et al. | Nephrology |  | Intravenous isotonic saline is recommended as prophylaxis for patients undergoing iodinated contrast procedures because contrast-induced nephropathy can often occur with this procedure and the infusion of isotonic saline is thought to prevent some of complications of nephropathy.13 14 In the present study of high-risk patients, it was found that contrast-induced nephropathy was no more common in those with no prophylaxis (2.6%; n=332) as compared to those with intravenous hydration (2.7%; p=0.47; n=328), and the cost savings was greater with no prophylaxis. This is a reversal of the practice of prophylactic hydration to protect renal function in high-risk patients undergoing iodinated contrast. | None found | Prophylactic saline hydration iodinated contrast material, no age restriction |
| 7 | High-flow warm humidified oxygen versus standard low-flow nasal cannula oxygen for moderate bronchiolitis (HFWHO RCT): an open, phase 4, randomised controlled trial Kepreotes et al. | Pulmonary disease | 3/4/2017  Lancet | High-flow warm humidified oxygen (HFWHO) is increasingly used for the treatment of respiratory infections in the pediatric population,15-17 but its efficacy has not been established in clinical trials. In this large randomized controlled trial, HFWHO did not reduce time on oxygen compared with cold wall oxygen (100%) therapy in children with moderate bronchiolitis. Median time to weaning was 24 hours for standard therapy (n=101) and 20 hours for HFWHO (HR=0.9; 95% CI=0.7-1.2; p=0.61; n=101). This is a reversal of the practice of HFWHO in children with moderate bronchiolitis. | 2017. “No difference in mortality or intubation was detected in patients with acute respiratory failure treated with high-flow nasal cannulae compared with usual care.” 18 This review did not include the RCT. | High-flow warm humidified oxygen and respiratory infection children |
| 8 | Comparison of an everolimus-eluting bioresorbable scaffold with an everolimus-eluting metallic stent for the treatment of coronary artery stenosis (ABSORB II): a 3 year, randomised, controlled, single-blind, multicentre clinical trial Serruys et al. | Cardiovascular Disease | 11/19/2016  Lancet | Bioresorbable scaffolds were developed as a way to promote revascularization to an area affected by obstructed coronary disease. These devices are thought to prevent restenosis after balloon angioplasty by delivering medications, but then will bioresorb after a time when the medications are no longer needed. These devices have received a CE mark and are widely used.19 20 In the ABSORB II Trial (335 patients in the scaffold group and 166 in the stent group), bioresorbable scaffolds were not superior to metallic stents, in regards to vasomotor reactivity (0.047 mm for scaffold vs. 0.056 mm for stent; p=0.49) and had larger late luminal loss (0.37 mm for scaffold vs. 0.25 mm for stent; p=0.78). This is a reversal of bioresorbable scaffolds for the treatment of coronary artery stenosis. | 2017. “Compared with everolimus-eluting stents, [bioresorbable vascular scaffolds] BVS is associated with increased risk of target lesion failure driven by the increased rates of target vessel myocardial infarction and ischemia-driven target lesion revascularization in these studies (mean follow-up, 25 months). The risk of definite or probable stent/scaffold thrombosis and very late stent/scaffold thrombosis seems to be higher with BVS. Further information from randomized trials is critical to evaluate clinical outcomes with BVS on complete resolution of the scaffold.”21 | GoogleScholar cited RCT |
| 9 | Comparison of stapled haemorrhoidopexy with traditional excisional surgery for haemorrhoidal disease (eTHoS): a pragmatic, multicentre, randomised controlled trial Watson et al. | Surgery | 11/12/2016  Lancet | Stapled hemorrhoidopexy and hemorrhoidal artery ligation are two newer, but commonly used, surgical interventions for severe hemorrhoids, although traditional excisional surgery is still used. A supposed advantage of the newer treatments is that they have less postoperative pain with similar symptom control.22 Numerous studies have been done, including 50 randomized controlled trials and several meta-analyses, comparing outcomes between stapled hemorrhoidopexy and traditional excisional surgery but these have had variable sample size and quality.23-25 To further examine and compare these outcomes, the eTHoS trial (389 received stapled haemorrhoidopexy and 388 received traditional excisional surgery) found that traditional excisional surgery led to more favorable pain scores, as measured by the EuroQol5 dimensions 3 level score, than stapled hemorrhoidopexy (1.62 vs. 1.56, respectively; p=0.03). This is a reversal of stapled hemorrhoidopexy for hemorrhoid disease. | None found | stapled hemorrhoidopexy with traditional excisional surgery |
| 10 | Efficacy of infant simulator programmes to prevent teenage pregnancy: a school-based cluster randomised controlled trial in Western Australia Brinkman et al. | Public Health and General Preventive Medicine | 11/5/2016  Lancet | The infant simulator is an example of persuasion technology or captology, where the use is intended to prevent teenage pregnancy.26 Their use is widespread in developed countries27 and is expanding into low-income and middle-income countries.28 However, in this study done in Australia, the infant simulator-based VIP program did not reduce teenage pregnancy. In fact, girls in the intervention group (n=1,267) were more likely to experience a birth (8% vs. 4%; HR=1.35; 95% CI=1.06-1.73; p=0.016) or an induced abortion (9% vs. 6%; HR=1.33 (1.00-1.78; p=0.049) than those in the control group (n=1,567) before they reached 20 years of age. This is a reversal of the practice of infant simulator programs to prevent teenage pregnancy. | None found | infant simulator program and teenage pregnancy |
| 11 | Platelet function monitoring to adjust antiplatelet therapy in elderly patients stented for an acute coronary syndrome (ANTARCTIC): an open-label, blinded-endpoint, randomised controlled superiority trial Cayla et al. | Cardiovascular Disease | 10/22/2016  Lancet | Platelet function monitoring may be one way to measure the platelet reactivity and adjust antiplatelet therapy to potentially improve clinical outcomes in patients with coronary artery disease, and was being used more frequently prior to this study.29 One example of this method of monitoring is the VerifyNow P2Y12 test, which measures aggregation with light transmittance to measure a patient’s response to antiplatelet therapy.30 Even though platelet function testing is still commonly used and international guidelines recommend platelet function testing in high-risk situations,31 32 this randomized controlled study (442 assigned to the monitoring group and 435 to the conventional group) does not support this practice in older adults with acute coronary syndrome. Rate of the composite outcome (cardiovascular death, myocardial infarction, stroke, stent thrombosis, urgent revascularization, and bleeding complications) was no better in the platelet testing group than in the control group ( HR=1.00; 95% CI=0.78-1.29). This is a reversal of the practice of platelet function monitoring to adjust antiplatelet therapy in elderly patients stented for acute coronary syndrome. | 2017. “Compared with traditional antiplatelet treatment, tailoring antiplatelet therapy according to  platelet reactivity testing failed to reduce all-cause mortality, MACE, and major bleeding events  in patients undergoing PCI..”33 | GoogleScholar cited RCT |
| 12 | Dexamethasone and supportive care with or without whole brain radiotherapy in treating patients with non-small cell lung cancer with brain metastases unsuitable for resection or stereotactic radiotherapy (QUARTZ): results from a phase 3, non-inferiority, randomised trial Mulvenna et al. | Oncology | 10/22/2016  Lancet | Whole brain radiotherapy (WBRT) in combination with steroids is a widely used approach in the management of patients with brain metastases, even though there is little evidence that it improves the quality of life or overall survival for the patient.34 35 With a sample size much bigger than other studies to date (N=538; 269 to each group), the QUARTZ Trial found that WBRT treatment did not result in better overall survival (HR=1.06; 95% CI=0.90-1.26) or quality of life (46.4 days for WBRT vs. 41.7 days for control) for patients with non-small cell lung cancer, and can be omitted from standard treatment. This is a reversal for WBRT in patients with NSCLC and brain metastases. | 2018. Cochrane review. There were only two studies, including the Mulvenna study, reporting on steroids alone versus steroids and WBRT. They were not able to pool the data because the other study did not include sufficient detail.36 | PubMed suggestion |
| 13 | Robot-assisted laparoscopic prostatectomy versus open radical retropubic prostatectomy: early outcomes from a randomised controlled phase 3 study Yaxley et al. | Oncology | 9/10/2016  Lancet | Surgery has traditionally been the main treatment of localized prostate cancer. However, complications with open radical retropubic prostatectomy has led to the search for less invasive treatments. Robot-assisted laparoscopic prostatectomy was introduced in 200137 and has been rapidly adopted, increasing from 1.8% to 85% between 2003-2013. Robot-assisted laparoscopic prostatectomy is becoming the dominant surgical approach for prostatectomy in many countries.38 In this randomized trial, urinary and sexual function scores were no better in the robot-assisted laparoscopic prostatectomy group (83.8 and 35.0, respectively; n=163) than the radical retropubic prostatectomy group (82.5 and 38.9, respectively; n=163; p-values are 0.48 and 0.18). This is a reversal of the practice of robot-assisted laparoscopic prostatectomy for localized prostate cancer. | 2017. Cochrane review. “There is no high-quality evidence to inform the comparative effectiveness of LRP [laparoscopic prostatectomy] or RARP [radical retropubic prostatectomy] compared to ORP for oncological outcomes. Urinary and sexual quality of life-related outcomes appear similar.”39 | GoogleScholar cited RCT |
| 14 | Immediate total-body CT scanning versus conventional imaging and selective CT scanning in patients with severe trauma (REACT-2): a randomised controlled trial Sierink et al. | Critical Care Medicine | 8/13/2016  Lancet | Total-body CT scanning is increasingly used in the primary assessment of patients with trauma because it can provide a complete overview of life-threatening injuries faster than standard work-up and is sometimes advocated as the method of choice for injury screening.40 41 This study found that the use of an immediate total-body CT scan as part of trauma work-up did not reduce in-hospital mortality compared with the standard radiological work-up (total-body CT= 16% vs. standard work up 16%; p=0.92; 702 to immediate total-body CT and 701 to standard work-up). This is a reversal of the practice of total body scanning in patients with trauma, as standard radiological work-up was just as good. | 2017. A recent MA found that this was the only RCT on this topic, whereas other studies on this topic were observational.42 | total body ct scan vs. selective in trauma (selected the most recent |
| 15 | Platelet transfusion versus standard care after acute stroke due to spontaneous cerebral haemorrhage associated with antiplatelet therapy (PATCH): a randomised, open-label, phase 3 trial Baharoglu et al. | Neurology/ Neurosurgery | 6/25/2016  Lancet | Platelet transfusion is often given to patients in the emergency department, stroke units, and neurosurgical settings who have had a hemorrhagic stroke because, often, it is these patients who are also taking antiplatelet therapy.43 44 Additionally, multiple retrospective studies have been done in multiple locations, showing that this is a used practice45. In the PATCH Trial, the odds of death or dependence was actually higher, not lower, among patients receiving platelet transfusion treatment, compared to standard care. Survival was 68% in the platelet transfusion group (n=97) vs. 77% for the standard care group (n=93; OR=2.05; 95% CI=1.18-3.56; p=0.01). This is a reversal of the practice of platelet transfusion to patients with hemorrhagic stroke, especially since it leads to worse outcomes. | None found | platelet transfusion after stroke |
| 16 | Hysteroscopy in recurrent in-vitro fertilisation failure (TROPHY): a multicentre, randomised controlled trial El-Toukhy et al. | Obstetrics and Gynecology | 6/25/2016  Lancet | Up to 25% of women with infertility have abnormal intrauterine pathology.46 Outpatient hysteroscopy before starting in-vitro fertilization (IVF) may help to diagnose and treat abnormalities of the cervix and uterine cavity and possibly improve IVF outcomes, and is sometimes considered part of the initial evaluation for infertility. 47 48 However, in this randomized controlled trial of 350 women in the hysteroscopy group and 352 women in the control group, outpatient hysteroscopy before IVF did not improve the livebirth rate, compared to no hysteroscopy in women with a history of unsuccessful IVF cycles (29% in both groups; risk ratio 1.0; 95% CI=0.79-1.25; p=0.96). This is a reversal of the practice of hysteroscopy in women with in-vitro fertilization, as it does not lead to better patient outcomes. | 2015. Cochrane review. “More studies are needed before hysteroscopy can be proposed as a fertility-enhancing procedure in the general population of women having difficulty becoming pregnant.”49 The review did not include the RCT. | Hysteroscopy in "in-vitro fertilization" |
| 17 | Hysteroscopy before in-vitro fertilisation (inSIGHT): a multicentre, randomised controlled trial Smit et al. | Obstetrics and Gynecology | 6/25/2016  Lancet | Outpatient hysteroscopy before starting in-vitro fertilization (IVF) is a procedure commonly used, which may help to diagnose and treat abnormalities of the cervix and uterine cavity and possibly improve IVF outcomes.47 Similar to results of the TROPHY trial, routine hysteroscopy did not improve livebirth rates in infertile women with a normal transvaginal ultrasound of the uterine cavity, compared to immediately starting IVF treatment without hysteroscopy, in the inSIGHT trial (57% for hysteroscopy vs. 54% for immediate IVF; RR=1.06; 95% CI=0.93-1.20; p=0.41; n=373 in hysteroscopy group and n=377 in the immediate IVF group). This is a reversal of the practice of hysteroscopy in women with in-vitro fertilization, as it does not lead to better patient outcomes. | 2015. Cochrane review. “More studies are needed before hysteroscopy can be proposed as a fertility-enhancing procedure in the general population of women having difficulty becoming pregnant.”49 | Hysteroscopy in "in-vitro fertilization" |
| 18 | Immediate delivery compared with expectant management after preterm pre-labour rupture of the membranes close to term (PPROMT trial): a randomised controlled trial Morris et al. | Obstetrics and Gynecology | 1/30/2016  Lancet | Both the American College of Obstetricians and Gynecologists and Royal College of Obstetrics and Gynaecology support and/or recommend immediate delivery for women with ruptured membranes who are 34 weeks or greater.50 Neonatal infection is a major concern in when there has been a ruptured membrane, especially in premature infants.51 In this trial, participants assigned to the expectant management group did not have any worse outcomes regarding the primary outcomes of neonatal sepsis (2%; n=924 in the immediate birth arm vs. 3%; n=915 in the expectant management arm; RR=0.8; 95% CI=0.5-1.3; p=0.37) or neonatal morbidity and mortality (8% vs. 7%; p=0.32) than those assigned to immediate delivery, and had less respiratory distress (p=0.008) and need for mechanical ventilation (p=0.02). This is a reversal of the practice of immediate delivery in women with preterm, pre-labor rupture of the membranes, as it does not lead to less neonatal sepsis. | 2017. Cochrane review. “We found no clinically important difference in the incidence of neonatal sepsis between women who birth immediately and those managed expectantly in PPROM prior to 37 weeks' gestation. Early planned birth was associated with an increase in the incidence of neonatal RDS, need for ventilation, neonatal mortality, endometritis, admission to neonatal intensive care, and the likelihood of birth by caesarean section, but a decreased incidence of chorioamnionitis.”52 | GoogleScholar cited RCT |
| 19 | Effectiveness of a nurse-led intensive home-visitation programme for first-time teenage mothers (Building Blocks): a pragmatic randomised controlled trial Robling et al. | Public Health and General Preventive Medicine | 1/9/2016  Lancet | Children born to young mothers or into impoverished circumtances are at higher risk for numerous adverse health outcomes. Programs such as the Family Nurse Partnership (FNP) have been designed to address maternal and birth outcomes, and improve cognitive and socioeconomic development.53 FNP has been offered outside of research settings since 1996.54 After several randomized trials showed this program to be successful in US cities, the UK implemented this program into a few selected areas.53 After implementation to a selected number of partnerships, the number of partnerships in the UK was expanded and a randomized trial, in pregnant women less than 20 years of age, testing the effectiveness of the program began (823 women assigned to FNP plus usual care and 822 received usual care only). This trial reported no differences in number of mothers who smoked (56% vs 56%; p=0.51) or in mean birthweight (3217 grams vs. 3198 grams; p=0.50). The practice of FNP in addition to usual care provided no key benefits and should be reversed. | None found |  |
| 20 | Outcomes after thrombus aspiration for ST elevation myocardial infarction: 1-year follow-up of the prospective randomised TOTAL trial Jolly et al. | Cardiovascular Disease | 1/9/2016  Lancet | In treating patients with ST elevation myocardial infarction, thrombus aspiration during percutaneous coronary intervention (PCI) is thought to reduce distal embolization and improve microvascular perfusion. Multiple studies show that this is an established practice,55-58 and the 2009 American College of Cardiology Foundation/American Heart Association Task Force on Practice Guidelines had recently included this as part of their recommendations.59 A dozen devices have been developed for manual thrombectomy.60 However, in this study, routine thrombus aspiration did not reduce the composite of cardiovascular death, myocardial infarction, shock, or heart failure compared with PCI alone. The primary outcome (a composite of CV death, MI, cardiogenic shock, or heart failure) occurred 8% in both groups (HR=1.00; 95%CI=0.87-1.15; thrombectomy followed by PCI n=5,371 and PCI alone n=5,360). This is a reversal of the practice of thrombus aspiration for ST elevation myocardial infarction. | 2017. “Routine aspiration thrombectomy prior to primary PCI was not associated with a reduction in long-term mortality or clinical outcomes.”61 | GoogleScholar cited RCT |
| 21 | Prophylactic antibiotics after acute stroke for reducing pneumonia in patients with dysphagia (STROKE-INF): a prospective, cluster-randomised, open-label, masked endpoint, controlled clinical trial Kalra et al. | Neurology/Neurosurgery | 11/7/2015  Lancet | Post-stroke pneumonia can occur after an acute stroke. Prophylactic antibiotics might decrease the risk of post-stroke pneumonia, mortality, and disability in these patients. Prophylactic antibiotics was standard of care in the 1990s and is still commonly used, even though current guidelines recommend against using them.62 63  Antibiotic prophylaxis (n=615) did not lead to lower rates of pneumonia in stroke patients, compared to standard stroke unit care (n=602; 13% vs. 10%, respectively; OR=1.21; 95% CI=0.71-2.08; p=0.49). This is a reversal of prophylactic antibiotics for pneumonia after acute stroke. | 2018. Cochrane review. “Preventive antibiotics had no effect on functional outcome or mortality, but significantly reduced the risk of 'overall' infections. This reduction was driven mainly by prevention of urinary tract infection; no effect for pneumonia was found.”64 | PubMed suggestion |
| 22 | Early combined immunosuppression for the management of Crohn's disease (REACT): a cluster randomised controlled trial Khanna et al. | Gastroenterology/Hepatology | 11/7/2015  Lancet | Early combined immunosuppression (ECI) emerged as a treatment strategy for Crohn's disease in an attempt to overcome issues of traditional step-care approach, such as delaying in effective therapy for those who do not respond to therapy initially. Several studies have already reported on the benefits of this type of approach.65 66 The European Crohn's and Colitis Organization recommend treatment with azathioprine or methotrexate for any patient who relapses early (<3 months) and supports the use of early therapy for patients with moderately active disease67 68 However, in this study, ECI (n=1084) was not more effective than conventional management (n=806) for inducing corticosteroid-free remission in patients with Crohn’s disease (66% vs. 61.9%; p=0.52). This is a practice of ECI for the management of Crohn’s disease. | None found | early immunosuppression in crohn's disease |
| 23 | Percutaneous tibial nerve stimulation versus sham electrical stimulation for the treatment of faecal incontinence in adults (CONFIDeNT): a double-blind, multicentre, pragmatic, parallel-group, randomised controlled trial Knowles et al. | Gastroenterology/Hepatology | 10/24/2015  Lancet | Stimulation of the sacral nerve is the first-line surgical intervention for those who do not respond to non-surgical treatments for fecal incontinence. Stimulation of the tibial nerve is non-invasive and may produce similar results because of the shared sacral segmental innervation. Several studies, including observational studies, have been done to evaluate this intervention.69 70 Stimulation of the tibial nerve has been proposed as a second line treatment for this condition.71 In this study, percutaneous tibial nerve stimulation (PTNS) did not lead to fewer episodes of fecal incontinence, compared to sham electrical stimulation (38% vs. 31% with 50% or greater reduction in the number of episodes of fecal incontinence per week; aOR=1.28; 95% CI=0.72-2.28; p=0.40; 115 assigned to PTNS and 112 to sham stimulation). This is a reversal fo percutaneous tibial nerve stimulation for fecal incontinence in adults. | Only one SR/MA was found on this specific topic. The authors conclude that percutaneous tibial nerve stimulation are associated with improvement in fecal incontinence, however, all but one of the studies used in their review were prospective case series.72 | Percutaneous tibial nerve stimulation and fecal incontinence |
| 24 | Methylprednisolone in patients undergoing cardiopulmonary bypass (SIRS): a randomised, double-blind, placebo-controlled trial Whitlock et al. | Cardiovascular disease | 9/26/2015  Lancet | Steroids suppress inflammatory responses that often occur in patients with cardiopulmonary bypass, and, therefore, might improve outcomes in patients at high risk of morbidity and mortality.73  This practice has been used routinely since the 1970s/1980s.74 In the SIRS study that included 3,655 patients in the methylprednisolone group and 3,752 to the placebo group, methylprednisolone did not lead to reductions in mortality (4% vs. 5%; RR=0.87; 95% CI=0.70-1.07; p=0.19) or major morbidity (24% vs. 24%; RR=1.03; 95% CI=0.95-1.11; p=0.52) after cardiopulmonary bypass. This is a reversal of methylprednisolone in patients undergoing cardiopulmonary bypass surgery. | A 2015 SR/MA that did not include this study, concluded that while corticosteroids decreased atrial fibrillation and length of hospital stay, they did not reduce mortality, and increased length of time spent on ventillation.75 | steroids for cardiopulmonary bypass |
| 25 | Medical expulsive therapy in adults with ureteric colic: a multicentre, randomised, placebo-controlled trial Pickard et al. | Urology | 7/25/2015  Lancet | Smooth muscle relaxant drugs are used for the treatment of ureteric colic as a kidney stone passes down the ureter, because they are thought to relax the ureteric smooth muscle. Guidelines by European Association of Urology (EAU) and the American Urologic Association (AUA) joint Guideline for the Management of Ureteral Calculi suggest this as a treatment option.76 77 Despite recommendations supporting their use, this study found that neither tamsulosin (81%; p=0.73; n=378) or nifedipine (80%; p=0.88; n=379) were more effective than placebo (80%; n=379) at decreasing the need for further treatment to achieve stone clearance (size 10mm or less) for patients with expectantly managed ureteric colic. This is a reversal of the practice of using either tamsulosin or nifedipine for expulsive therapy in patients with ureteric colic (stone size 10mm or less). | One recent SR/MA comparing only tamsulosin and nifedipine (the two active interventions in the study) found that nifedipine was better than tamsulosin but this SR/MA did not compare these interventions to a control arm.78 In another SR/MA of alpha blockers (tamsulosin) compared with placebo or other control, alpha blockers were associated with a higher likelihood of stone passage than placebo or other type of control, but this association was mainly for larger stones.79 | GoogleScholar cited RCT |
| 26 | Efficacy and safety of very early mobilisation within 24 h of stroke onset (AVERT): a randomised controlled trial AVERT Trail Collaboration Group; Bernhardt et al. | Neurology/Neurosurgery | 7/4/2015  Lancet | Early mobilization after stroke is recommended in many guidelines because of potential benefits to the musculoskeletal, cardiovascular, and respiratory systems during a window of brain plasticity and repair following stroke, with most recommending rehabilitation beginning as soon as the diagnosis of stroke is established and life threatening issues are under control or within 24 hours.80 Previous studies have generally found positive findings with this type of intervention, but in this randomized controlled trial, very early mobilization protocol (within 24 hours) led to fewer people achieving a high score on the modified Rankin Scale (46% [n=480] vs. 50% [n=525]; aOR=0.73; 95%CI=0.59-0.90; p=0.004), which is used to measure disability after a stroke, compared to usual care. This is a reversal of the practice of very early mobilization after a stroke. | 2017. Pooled data from RCTs concluded that VEM [very early mobilization] is not associated with beneficial effects when carried out in patients 24 or 48 hours after the onset of a stroke.”81 | GoogleScholar cited RCT |
| 27 | Automated, electronic alerts for acute kidney injury: a single-blind, parallel-group, randomised controlled trial Wilson et al. | Nephrology | 5/16/2015  Lancet | Automated alerts are used for a wide range of clinical settings, and may be especially helpful for monitoring kidney injury, which can be complex and time sensitive to treat.82-85 Because of this, consensus statements have been made recommending the use of tailored early treatment, and clinician notification has been rapidly adopted as a way to tailor the patient’s treatment86-88  However, in this trial, the use of an electronic alert system did not improve clinical outcomes (creatinine, dialysis, and death) in patients with acute kidney injury (11.1% [n=1207] vs. 11.6% [n=1192]; p=0.88). This is a reversal of the practice of automated, electronic alerts for acute kidney injury in hospitalized patients. | 2017. “The benefit of electronic alerting systems for acute kidney injury has this far not been supported by randomized studies..”89 This review only found and included two randomized studies. | GoogleScholar cited RCT |
| 28 | Efficacy of indoor residual spraying with dichlorodiphenyltrichloroethane against malaria in Gambian communities with high usage of long-lasting insecticidal mosquito nets: a cluster-randomised controlled trial Pinder et al. | Public Health and General Preventive Medicine | 4/11/2015  Lancet | Insecticidal nets, indoor residual spraying, and artemisinin-based therapies have helped in reducing malaria in sub-Saharan Africa. Survey data from 17 African countries showed that the combination use of long-lasting insecticidal nets and indoor residual spraying has been used and could be an effective combination to prevent even more cases and deaths from malaria.90-92 In this study, the use of indoor residual spraying in addition to insecticidal nets did not result in any improvement in clinical malaria or vector density than insecticidal nets only in Gambian village homes. The incidence rate was 0.047 per child-month in the control arm (nets; n=3,622) and 0.044 per child-month in the group with residual spraying, in addition to nets (n=3,777; rate ratio=1.08; 95% CI=0.80-1.46). This is a reversal of the practice of indoor residual spraying to prevent malaria. | No MA were found since the publication of this study. There was only was SR in the gray literature (BA thesis) that found positive results for this intervention but most of the studies were observational and not randomized.93 | GoogleScholar cited RCT |
| 29 | Effect of early neonatal vitamin A supplementation on mortality during infancy in Ghana (Neovita): a randomised, double-blind, placebo-controlled trial Edmond et al. | Pediatrics | 4/4/2015  Lancet | Vitamin A deficiency is a public health issue in low-income countries. While multiple trials have been performed, in addition to a Cochrane review, on the effectiveness of vitamin A supplementation in infants in low-income countries, the WHO stated that there was insufficient evidence to make a recommendation on its usage.94-96 The International Vitamin A Consultative Group (IVACG) supports the use of 50,000 IUs for infants <6 months of age.97 In this trial based in Ghana, vitamin A supplementation did not lead to a lower mortality rate compared to placebo (24.5/1,000 [n=11,474] vs. 21.8/1,000 [n=11,481] supplemented infants; RR1.12; 95% CI=0.95-1.33; p=0.18), in newborn infants. This is a reversal of the practice of vitamin A supplementation during the early neonatal period in Africa, as it does not improve mortality. | 2017. Cochrane review. “Evidence provided in this review does not indicate a potential beneficial effect of vitamin A supplementation among neonates at birth in reducing mortality during the first six months or 12 months of life.”98 | "vitamin A" supplementation infant mortality (in Cochrane reviews)/ Pubmed suggestion |
| 30 | Effect of neonatal vitamin A supplementation on mortality in infants in Tanzania (Neovita): a randomised, double-blind, placebo-controlled trial Masanja et al. | Pediatrics | 4/4/2015  Lancet | Vitamin A deficiency is a public health issue in low-income countries. While multiple trials, including a Cochrane review, have been performed on the effectiveness of vitamin A supplementation in infants in low-income countries, the WHO stated that there was insufficient evidence to make a recommendation on its usage.94-96 The International Vitamin A Consultative Group (IVACG) supports the use of 50,000 IUs for infants <6 months of age.97 In this trial based in Tanzania, vitamin A supplementation did not lead to a lower mortality rate (26/1,000 [n=15,995] vs. 24/1,000 [n=16,004] livebirths; risk ratio=1.10; 95%CI=0.95-1.26) compared to placebo, in newborn infants. This is a reversal of the practice of neonatal vitamin A supplementation to reduce mortality in infants in Africa. | 2017. Cochrane review. “Evidence provided in this review does not indicate a potential beneficial effect of vitamin A supplementation among neonates at birth in reducing mortality during the first six months or 12 months of life.”98 | "vitamin A" supplementation infant mortality (in Cochrane reviews)/ Pubmed suggestion |
| 31 | A population-based, multifaceted strategy to implement antenatal corticosteroid treatment versus standard care for the reduction of neonatal mortality due to preterm birth in low-income and middle-income countries: the ACT cluster-randomised trial Althabe et al. | Obstetrics and Gynecology | 2/14/2015  Lancet | Antenatal corticosteroids are effective at reducing preterm birth among women at risk. Even though it is recommended for high-risk women by the WHO,99 many women in low-income countries may not receive this potentially beneficial intervention. Multiple groups have studied and promoted the use of antenatal corticosteroid scale-up programs.100 101 When an antenatal scale-up program was implemented in low-income countries (dexamethasone administered from 24-36 weeks gestation) 28-day neonatal mortality in preterm infants did not decrease. Conversely, a higher mortality rate was seen in babies born 37 weeks gestation, compared to standard care (27.4/1,000 [n=48,219] vs. 23.9/1,000 [51,523 livebirths]; RR=1.12; 95% CI=1.02-1.22; p=0.013). While corticosteroids are beneficial for preventing preterm births in women with access to adequate health care, in low to middle income countries, this practice did not reduce neonatal mortality. This is a reversal of the practice of using corticosteroids for the reduction of neonatal mortality due to preterm births in women residing in low-income and middle-income countries. | None found | "corticosteroid at risk of preterm birth low income"; "scale up programs for corticosteroid" |
| 32 | Antepartum dalteparin versus no antepartum dalteparin for the prevention of pregnancy complications in pregnant women with thrombophilia (TIPPS): a multinational open-label randomised trial Rodger et al. | Obstetrics and Gynecology | 11/28/2014  Lancet | Women with genetic thrombophilias are at higher risk of adverse pregnancy outcomes.102 This observation, combined with results from small trials showing a benefit of low-molecular-weight heparin on pregnancy outcomes in women with thrombophilias, led to the adoption of this therapy by clinicians and guideline committees.103-105 However, in this study, antepartum prophylactic heparin did not reduce the occurrence of thromboembolism, pregnancy loss, or placenta-mediated pregnancy complications in pregnant women with thrombophilia (17.1% [n=146] vs. 18.9% [n=143] for the composite outcome; p=0.70). This is a reversal of the practice of antepartum prophylactic heparin administration in pregnant women with thrombophilia. | 2016. “We found no difference in preventing future pregnancy loss with LMWH [low-molecular-weight heparin] when compared with no LMWH in women with inherited thrombophilia and prior late or recurrent early pregnancy loss.”106 The study was published only a few months after the SR/MA was conducted, and therefore not included in the SR/MA. | GoogleScholar-cited RCT |
| 33 | Efficacy of paracetamol for acute low-back pain: a double-blind, randomised controlled trial Williams et al. | Orthopedic | 11/1/2014  Lancet | Paracetamol is the recommended first-line analgesic for acute low-back pain, despite the lack of high-quality evidence to support this recommendation. 107 108 In this study, time to recovery for patients with acute low-back pain was no different between regular or as-needed paracetamol, compared to placebo, with 85% [n=550], 83% [n=549], and 84% [547] of participants in the regular, as-needed, and placebo (control arm), respectively, reaching sustained recovery (p=0.79). Paracetamol is ineffective for acute low-back pain. This is a reversal of using paracetamol for acute low-back pain. | 2015. “Paracetamol is ineffective in the treatment of low back pain 109 The conclusions were based mainly on the results of this one study. | GoogleScholar cited RCT |
| 34 | Efficacy and cost of video-assisted thoracoscopic partial pleurectomy versus talc pleurodesis in patients with malignant pleural mesothelioma (MesoVATS): an open-label, randomised, controlled trial Rintoul et al. | Oncology | 9/20/2014  Lancet | Standard treatment for pleural effusion in patients with mesothelioma was once talc pleurodesis. .110-112 Video-assisted thoracic surgery was “supported with fervor” in the early 1990’s by pulmonologists and oncologists.113 In this study, video-assisted thoracoscopic partial pleurectomy, which is a more invasive intervention, did not lead to better survival in patients with mesothelioma (52% [n=87] vs. 57% [n=88] in the VATS and talc pleurodesis groups, respectively), and surgical complications were more common, when compared to the standard talc pleurodesis. This is a reversal of the practice of VATS in patients with malignant pleural mesothelioma. | 2016. Cochrane review. Using network analysis, the authors concluded that talc was a better method of pleurodesis than other used methods. While this review did cite this study, it was the only one included in the review that compared talc with partial pleurectomy.114 | suggested SR by PubMed. |
| 35 | High versus low positive end-expiratory pressure during general anaesthesia for open abdominal surgery (PROVHILO trial): a multicentre randomised controlled trial PROVE Network Investigators, Hemmes et al. | Anesthesiology | 8/9/2014  Lancet | Mechanical ventilation can help to minimize post-operative pulmonary complications, but this procedure can lead to its own set of complications. Positive end-expiratory pressure (PEEP) is commonly used in mechanical ventilation, and studies have shown that high-levels of PEEP can be safely applied.115-117 High PEEP was used frequently in the 1970’s and is now sometimes part of open lung and protective lung ventilation strategies.118 Postoperative complications in this study were no different between those with high and lower PEEP (40% [n=447] vs. 39% [n=453]; RR=1.01; 95%*=*0.86-1.20; p=0.86), and high PEEP led to more intraoperative hypotension and needed more vasoactive drugs. This is a reversal of high PEEP for patients receiving open abdominal surgery. | 2014. Cochrane review. “Evidence is currently insufficient to permit conclusions about whether intraoperative PEEP alters risks of postoperative mortality and respiratory complications among undifferentiated surgical patients.”119 The Cochrane review did not include this RCT. | GoogleScholar cited RCT |
| 36 | Effect of gravity on volume of placental transfusion: a multicentre, randomised, non-inferiority trial Vain et al. | Obstetrics and Gynecology | 7/19/2014  Lancet | It is believed that delaying cord clamping after a baby is delivered and holding the baby at or below the level of the vagina increases the beneficial passage of blood from the placenta to the baby. Because of this belief, recommendations have been made supporting this practice, even though it can be cumbersome and interferes with the mother/baby bonding.120-122 The authors of a Cochrane review advocate that mothers should be supported in their decision of baby placement after birth.123 A survey of nurse-midwives reported that the majority of respondents placed the baby on the mother's abdomen and not at a lower level. 124 This study showed that keeping the baby below the level of the vagina, as compared to placing the baby on the abdomen, did not lead to better weight gain (as a proxy for placental transfusion volume; 56 g [n=274] vs. 53 g [272]; p=0.45), and babies can be safely placed in the arms of their mothers immediately after birth without affecting weight gain. This is a reversal of the practice of keeping the baby at or below the level of the mother’s vagina immediately after birth. | A Cochrane review from 2010 was not able to make a conclusion because of the lack of studies evaluating practice (no RCTs). 123 | gravity and cord clamping (Cochrane.org - no SR/MA were found using GoogleScholar) |
| 37 | Comprehensive physiotherapy exercise programme or advice for chronic whiplash (PROMISE): a pragmatic randomised controlled trial Michaleff et al. | Orthopedic | 7/12/2014  Lancet | Clinical practice guidelines support the use of conservative treatment approaches such as physiotherapy exercise programs for whiplash-associated disorders but acknowledge that there has been little research on the effectiveness of this type of intervention.125-127 This study shows that a comprehensive exercise program (n=86) was no better in reducing pain for patients with chronic whiplash-associated disorder than was a one-time 30-minute consultation with a physiotherapist (n=86). Differences in pain at 14 weeks, 6 months, and 12 months were 0.0, 0.2, and -0.1 on a scale, where 2 is a clinically worthwhile effect. This is a reversal of the practice of a comprehensive physiotherapy exercise program for patients who have experienced whiplash. | A SR/MA that was presented (conference brief only) a few months before this study, concluded that conservative treatment (physiotherapy, behavioral approaches) was effective at reducing pain in patients with whiplash associated disorder.128 This RCT was not included in the review. | GoogleScholar cited RCT |
| 38 | Compression stockings to prevent post-thrombotic syndrome: a randomised placebo-controlled trial Kahn et al. | Cardiovascular Disease | 3/8/2014  Lancet | Post-thrombotic syndrome can often develop after deep venous thrombosis. Elastic compression stockings are often used and recommended because of their potential to reduce venous hypertension and reflux.129-131 In one survey of university-based physicians in Canada, 68% reported prescribing compression stockings if the patients had venous symptoms.132 In the SOX trial, elastic compression stockings did not prevent post-thrombotic syndrome in patients with an initial deep vein thrombosis (14.2% in the compression stocking group [n=410] and 12.7% in the placebo group [n=396]; HR=1.13; 95% CI=0.73-1.76; p=0.58). This is a reversal of using compression stocking to prevent post-thrombotic syndrome in patients who experienced deep venous thrombosis. | 2017. Cochrane review. “Low-quality evidence suggests that elastic compression stockings may reduce the occurrence of PTS after DVT. We downgraded the quality of evidence owing to considerable heterogeneity between studies and lack of or unclear risk of blinding due to clinical assessment scores... Large randomised controlled trials are needed to confirm these findings because of current lack of high-quality evidence and considerable heterogeneity.” 133 | PubMed suggestion |
| 39 | Medical management with or without interventional therapy for unruptured brain arteriovenous malformations (ARUBA): a multicentre, non-blinded, randomised trial Mohr et al. | Neurology/Neurosurgery | 2/15/2014  Lancet | Brain arteriovenous malformations in patients confer a small but higher risk of brain hemorrhage. There is debate about whether to treat these malformations before they rupture. Currently, a conservative approach is recommended but microsurgical resection, stereotactic radiotherapy, and endovascular embolization are commonly used.134-136 The Stroke Council of the American Heart Association guidelines at the time of this study strongly recommended the consideration of interventional therapy for larger aneurysms (>9mm).137 In this study, medical management alone led to less death or stroke than did medical management with interventional therapy (10.1% vs. 30.7%, respectively) in patients with unruptured brain arteriovenous malformations of various sizes. This is a reversal of the practice of interventional therapy in patients with unruptured brain arteriovenous malformations and who receive medical management. | None found | "unruptured brain arteriovenous malformations medical management:, "unruptured brain arteriovenous malformations treatment" (no date restriction) |
| 40 | Liverpool Care Pathway for patients with cancer in hospital: a cluster randomised trial Constantini et al. | Oncology | 1/18/2014  Lancet | The Liverpool Care Pathway (LCP) program for dying patients was developed in the late 1990s in an attempt to improve end-of life care by transferring hospice practices of end-of-life care to hospitals. Broad uptake of this program occurred before its effectiveness could be thoroughly studied.138-141 Results from this study show that scores measuring the quality of end-of-life care were no different between hospitals who implemented LCP and those with standard health-care practice (score 70.5/100 [n=147] vs. 63.0/100 [161]; p=0.19). This is a reversal of using the LCP in hospitalized cancer patients. | 2017. Cochrane review. “There is limited available evidence concerning the clinical, physical, psychological or emotional effectiveness of end-of-life care pathways.”142 | PubMed suggestion |
| 41 | A structured training programme for caregivers of inpatients after stroke (TRACS): a cluster randomised controlled trial and cost-effectiveness analysis Forster et al. | Neurology/Neurosurgery | 12/21/2013  Lancet | Stroke can lead to disability, which can place added burden on family members who care for these patients on a daily basis. Interventions have been developed and implemented to reduce the burden on caregivers.143 144 In this study, caregivers who received training for how to care for stroke patients did not have better scores on the caregiver burden scale (45.5 [n=450] vs. 45.0 [n=478]; p=0.67), nor did patients have any better functional scores (27.4 vs. 27.6; p=0.87) than did caregivers or patients who received usual care. This is a reversal of training programs for caregivers immediately after stroke. | On recent SR/MA found that transitional care interventions were generally effective at reducing mortality, but when looking only at educational interventions, which this study was considered, there was no beneficial effect on mortality.145 This RCT was the only multi-center study with a primary education intervention and had the largest sample size. | GoogleScholar cited RCT |
| 42 | Intra-aortic balloon counterpulsation in acute myocardial infarction complicated by cardiogenic shock (IABP-SHOCK II): final 12 month results of a randomised, open-label trial Thiele et al. | Cardiovascular Disease | 11/16/2013  Lancet | Mortality in acute myocardial infarction is high even though beneficial treatment strategies have been developed. The Intra-aortic balloon pump (IABP) has been the most frequently used mechanical cardiac assist device for almost 50 years.146 However, IABP did not lead to lower mortality in this study of patients undergoing early revascularization for myocardial infarction (52% [n=301] vs. 51% [n=299]; RR=1.01; 95% CI=0.86-1.18; p=0.91). This is a reversal of IABP in acute myocardial infarction complicated by cardiogenic shock. | 2016. “In patients undergoing high-risk coronary revascularization, IABP did not significantly decrease mortality. But high-risk CABG patients may be benefit from IABP. Rigorous criteria should be applied to the use of IABPs.”147 | GoogleScholar cited RCT |
| 43 | Effect of household and community interventions on the burden of tuberculosis in southern Africa: the ZAMSTAR community-randomised trial Ayles et al. | Pulmonary Disease | 10/5/2013  Lancet | Enhanced case finding of tuberculosis has been done with various methods since the 1960s.148 Recommendations current to the time of this study recommended the use of media campaigns and outreach at schools and workplaces, in addition to active case finding.148 In the ZAMSTAR trial, neither enhanced case finding (adjusted prevalence ratio=1.04; 95% CI=0.72-1.51; p=0.81) nor household interventions (adjusted prevalence ratio=0.78; 95% CI=0.54-1.12; p=0.16) led to reductions in tuberculosis, compared to standard community clinic practices. This is a reversal of the practice of enhanced case findings and household interventions in Africa to reduce tuberculosis incidence. | 2017. Cochrane review. “The available evidence demonstrates that when used in appropriate settings, active case-finding approaches may result in increase in tuberculosis case detection in the short term. The effect of active case finding on treatment outcome needs to be further evaluated in sufficiently powered studies.”149 While the case detection was better in this review, there did not appear to be an improvement in treatment success, mortality, or TB prevalence in the community with these interventions. |  |
| 44 | Screening and counselling in the primary care setting for women who have experienced intimate partner violence (WEAVE): a cluster randomised controlled trial Hegarty et al. | Public Health and General Preventive Medicine | 7/20/2013  Lancet | The World Health Organization endorses early intervention in the primary care setting for intimate partner violence (IPV),150 but there is often a lack of structured interventions for physicians to use for the issue of IPV. Evidence for the effectiveness of IPV screening instruments has guided recommendations by the United States Preventive Service Task Force (USPSTF) in use of this intervention, but do not make specific recommendations on types of counseling for those who screen positive.151 The WEAVE study randomized physicians to provide patients care with either the Healthy Relationships Training Program in addition to basic IPV education or routine care with basic IPV education. In this study, there were no differences in quality of life (63.5 [n=96] vs. 62.2 [n=100]; p=0.50), or mental health SF-12 (47% vs. 52%; p=0.52) between those assigned to the intervention group and those assigned to the control group in women who screened positive for fear of a partner. This is a reversal of the practice of counselling with the use of the Healthy Relationships Training Program in the primary care setting for women who have experience intimate partner violence. | None found |  |
| 45 | Exercise for depression in elderly residents of care homes: a cluster-randomised controlled trial Underwood et al. | Psychiatry | 7/6/2013  Lancet | Depression is common among residents of care homes. Many studies have evaluated different types of exercise interventions in different older adult populations, with varying degrees of efficacy in treating depression.152-155 The 2008 Physical Activity Guidelines for Americans has found strong evidence that physical activity helps with depression in adults and older adults, but these guidelines were for the older adult population, in general, and not for specific subgroups of older adults.156 In this study, the addition of a moderately intense exercise program to adults 65 years and older did not reduce depressive symptoms in residents of care homes compared to a depression awareness training alone. While exercise may be beneficial for other reasons, this is a reversal of the practice of exercise for alleviating depression in older adults residing in resident care homes. | None found. Because of the results of this trial, updates to the Cochrane review will include strata-specific results to account for heterogeneity in the older adult population.157 | exercise and depression in older adults |
| 46 | Community treatment orders for patients with psychosis (OCTET): a randomised controlled trial Burns et al. | Psychiatry | 5/11/2013  Lancet | Community treatment orders (CTOs) are legal orders that are part of 17A of the Mental Health Act. They were introduced in England and Wales in 2008, and require patients to accept clinical monitoring and treatment while living in the community.158 159 In this study, the imposition of compulsory supervision did not reduce the number of readmission of psychotic patients (36% [n=166] vs. 36% [n=167]; RR=1.0; 95% CI=0.75-1.33). This is a reversal of the practice of community treatment orders for patients with psychosis. | 2017. Cochrane review. “Compulsory community treatment results in no significant difference in service use, social functioning or quality of life compared with standard care.”160 | PubMed suggestion |
| 47 | Population deworming every 6 months with albendazole in 1 million pre-school children in north India: DEVTA, a cluster-randomised trial Awasthi et al. | Public Health and General Preventive Medicine | 4/27/2013  Lancet | Worm infection in children can lead to various health conditions, including vitamin deficiencies and cognitive impairment. Results from a Cochrane review on whether deworming is an effective intervention are mixed.161-163 The World Health Organization recommends deworming strategies in the pre-school and school-age populations.164 Community deworming in this trial did not lead to lower mortality rates in India (deaths per child-care center: 3.00 [albendazole] vs. 3.16 [control]). This is a reversal of the practice of population deworming every 6 months with albendazole for pre-school children in India. | 2017. “Deworming did not show consistent benefits for indicators of mortality, anemia, or growth in children younger than five or women of reproductive age. We do not recommend including the effect of deworming in the LiST model.”165 | GoogleScholar cited RCT |
| 48 | Biolimus-eluting biodegradable polymer-coated stent versus durable polymer-coated sirolimus-eluting stent in unselected patients receiving percutaneous coronary intervention (SORT OUT V): a randomised non-inferiority trial Christiansen et al. | Cardiovascular Disease | 2/23/2013  Lancet | The biolimus-eluting stent (Nobori) was developed to reduce the risk of restenosis with a controlled release of antiproliferative drugs with a degradation of the polymer. They were approved by the European Economic Area in 2008.166 167 Not only was the biolimus-eluting stent found to not be non-inferior compared to a sirolimus-eluting stent in this trial, there were more incidences of stent thrombosis among those with biolimus-eluting stents (4.1% [n=1,229] vs. 3.8% [n=1,239]; p(non-inferiority)=0.06). Further, these stents did not improve rates of cardiac death, myocardial infarction, or definite stent thrombosis. This is a reversal of the practice of biolimus-eluting stents in patients receiving percutaneous coronary intervention. | A SR/MA of RCTs concluded that biolimus-eluting stents were not better than sirolimus-eluting stents at reducing mortality, myocardial infarction, or major adverse cardiac events.168 The RCT was not included in this review. | GoogleScholar cited RCT |
| 49 | Emergency department treatments and physiotherapy for acute whiplash: a pragmatic, two-step, randomised controlled trial Lamb et al. | Orthopedic | 2/16/2013  Lancet | The chronic symptoms that can result from whiplash can be economically burdensome in terms of treatment and loss of work productivity. Guidelines recommend physiotherapy even though this intervention is not supported by evidence.169-171 The Whiplash Book was developed to educate patients on managing whiplash.171 This book, published in 2004, has been studied in multiple populations and can now be found on Amazon.com.172-174 In this two-step trial, neck disability scores were no different between patients who received the Whiplash Book (n=2,253) and those who did not receive the book (n=1,598; difference at 12 months 0.5, 95% CI=-1.5 to 2.5). This is a reversal of active management with the use of the Whiplash Book in patients who present at the emergency department for acute whiplash. | In one SR/MA of RCTs that did not include this study, the authors conclude that therapeutic exercise was beneficial in improving short-term and intermediate-term pain and disablilty.175 A Cochrane review concluded that there was insufficient high quality evidence to make a conclusion about the effectiveness of exercise for neck pain.176 However, this review also did not include this study since the intervention was a "multimodal treatment". | GoogleScholar cited RCT |
| 50 | Antimicrobial catheters for reduction of symptomatic urinary tract infection in adults requiring short-term catheterisation in hospital: a multicentre randomised controlled trial Pickard et al. | Urology | 12/1/2012  Lancet | Urinary tract infections are common among patients with catheters. Several antimicrobial catheters are widely available, with the intent of reducing catheter-associated infections. These include silver alloy-coated and nitrofural-impregnated ones, silver agents being the most commonly used for catheters.177 A Cochrane Review has reported that while multiple studies have examined the effectiveness of these devices, the results are equivocal.178 Compared with traditional polytetrafluoroethylene catheters, silver alloy-coated catheters did not reduce symptomatic urinary tract infections in this trial (12.5% [n=2,097] vs. 12.6% [n=2,144]). This is a reversal of the practice of silver alloy-coated catheters for preventing urinary tract infection in patients requiring short-term catheterization. | None found | antimicrobial catheters and urinary tract infection |
| 51 | Screening for type 2 diabetes and population mortality over 10 years (ADDITION-Cambridge): a cluster-randomised controlled trial Simmons et al. | Public Health and General Preventive Medicine | 11/17/2012  Lancet | Thirty-five percent of people in England have prediabetes179 and many of these individuals will progress to type 2 diabetes. The current UK National Health Service (NHS) Health Checks program includes an assessment of diabetes risk for all individuals 40–74 years of age.180 181 All-cause, cardiovascular, or diabetes-related mortality was not decreased with the implementation of diabetes screening programs in this study. The mortality hazard ratio was 1.06 (95% CI=0.90-1.25). This is a reversal of the practice of screening all individuals 40-74 years of age for diabetes. | 2015. United States Preventive Services Task Force. “Screening for diabetes did not improve mortality rates after 10 years of follow-up.”182 | PubMed suggestion |
| 52 | Comparison of annual versus twice-yearly mass azithromycin treatment for hyperendemic trachoma in Ethiopia: a cluster-randomised trial Gebre et al. | Infectious Disease | 1/14/2012  Lancet | Azithromycin is the standard treatment for people with *Chlamydia trachomatis* of the eye. The WHO supports an annual mass treatment of chlamydia infection with azithromycin but for children in hyperendemic areas (>10% of children 1-9 years of age infected), three treatment cycles should before reassessment.183-186 Some have recommended and used biannual treatment of trachoma in hyperendemic areas.187-189 In this trial, ocular chlamydia infection was no different in those treated once yearly as compared to those who received treatment twice yearly (p>0.99). This is a reversal of the practice of the additional mass azithromycin treatment for trachoma, as a once-yearly treatment is adequate. | None found | azithromycin for endemic trachoma |
| 53 | Sertraline or mirtazapine for depression in dementia (HTA-SADD): a randomised, multicentre, double-blind, placebo-controlled trial Banerjee et al. | Psychiatry | 7/30/2011  Lancet | Sertraline and mirtazapine are commonly prescribed for depression in older adults, and mirtazapine is recommended as a first-line treatment for depression in clinical guidelines, regardless of age.190-193 The results from this trial show that neither sertraline (n=107; mean difference=1.17; 95% CI=-0.23 to 2.58; p=0.10) nor mirtazapine (n=108; mean difference=0.01; 95% CI=-1.37 to 1.38; p=0.99) improved rates of depression over placebo (n=111) in those with Alzheimer's disease. This is a reversal of the practice of using traditional treatments for depression, such as sertraline or mirtazapine, in patients with Alzheimer’s, as depression in this population may have different mechanisms than that of the general population. | 2017. “We found no significant drug-placebo difference for depressive symptoms. Overall quality of the evidence was moderate because of methodological limitations in studies and the small number of trials.”194 | GoogleScholar - cited this RCT |
| 54 | Prednisone versus tamoxifen in patients with idiopathic retroperitoneal fibrosis: an open-label randomised controlled trial Vaglio et al. | Nephrology | 7/23/2011  Lancet | Idiopathic retroperitoneal fibrosis is a rare disease with no established treatment. Several treatments, including glucocorticoids, immunosuppressive drugs, and tamoxifen, have been used anecdotally, but none of these treatments have been tested for efficacy. The most commonly used treatment at the time of the study was glucocorticoid therapy but tamoxifen therapy had also become a generally accepted treatment.195-197 In this RCT, relapse in idiopathic retroperitoneal fibrosis was more common in the tamoxifen compared to prednisone in this trial (39% vs. 6%; p=0.04; n=20 in each group), even though an equal amount of patients in each group achieved remission initially. This is a reversal of tamoxifen treatment for idiopathic retroperitoneal fibrosis. | None found | treatment for idiopathic retroperitoneal fibrosis |
| 55 | Urinary incontinence in men after formal one-to-one pelvic-floor muscle training following radical prostatectomy or transurethral resection of the prostate (MAPS): two parallel randomised controlled trials Glazener et al. | Urology | 7/23/2011  Lancet | Urinary incontinence is a common side effect of radical prostatectomy for the treatment of localized prostate cancer. Pelvic-floor muscle training is effective for urinary incontinence in women and is well established. Although less established in men, this type of therapy is also recommended for men with urinary incontinence.198 199 In this trial, pelvic floor exercises, compared to standard care, did not improve urinary incontinence in men who had been treated for prostate cancer or benign prostatic enlargement (radical prostatectomy trial; 76% [n=196] vs. 77% [n=195]; p=0.64; transurethral resection of the prostate trial: 65% [n=194] vs. 62% [n=203]; p=0.47). This is a reversal of the practice of pelvic floor muscle training to prevent urinary incontinence in men who have undergone radical prostatectomy. | 2015. Cochrane review. “There was no evidence from eight trials that pelvic floor muscle training with or without biofeedback was better than control for men who had urinary incontinence up to 12 months after radical prostatectomy.”200 | PubMed suggestion |
| 56 | The angiotensin-receptor blocker candesartan for treatment of acute stroke (SCAST): a randomised, placebo-controlled, double-blind trial Sandset et al. | Neurology/Neurosurgery | 2/26/2011  Lancet | At the time of this study, there was considerable debate as to whether or not to treat hypertension immediately after a stroke. Guidelines leaned toward not treating hypertensive stroke victims, unless they are very hypertensive, because of the lack of evidence, but also suggest that starting of antihypertensive therapy within 24 hours is "relatively safe".201 Evidence showed that adverse outcomes were associated with both high and low blood pressure immediately after a stroke, and multiple studies have examined the effects of antihypertensive therapy.202 203 Candesartan is a commonly used drug for hypertension that was approved by the FDA in 2000.204 Even though blood pressure was reduced in the candesartan group in this study, it did not lead to better cardiovascular outcomes (composite of vascular death, MI, or stroke) compared to placebo (aHR=1.09; 95 % CI=0.84-1.41; p=0.52). This is a reversal of the routine practice of improving blood pressure with candesartan immediately after a stroke. | 2014. Cochrane review. “There is insufficient evidence that lowering blood pressure during the acute phase of stroke improves functional outcome.”205 Another recent SR/MA concluded that early blood pressure lowering may increase death after acute stroke, and the authors do not support the use of this practice.206 | PubMed suggestion |
| 57 | High-dose vitamin D3 during intensive-phase antimicrobial treatment of pulmonary tuberculosis: a double-blind randomised controlled trial Martineau et al. | Pulmonary Disease | 1/15/2011  Lancet | High doses of vitamin D have been used in the treatment of tuberculosis before antibacterial chemotherapy in the 1950's because of the observation that patients who took cod liver oil had improvements in their tuberculosis disease status.207 Better understanding of the biologic mechanisms of vitamin D has led to a revived interest in this as a treatment for tuberculosis.208-210 In this study, vitamin D, compared to placebo, did not improve time to sputum culture conversion among patients (62 assigned to intervention and 64 assigned to placebo) with pulmonary tuberculosis (aHR=1.39; 95% CI=0.90-2.16). This is a reversal of the practice of high-dose vitamin D3 during antimicrobial treatment of tuberculosis. | 2016. Cochrane review. “Although blood levels of some vitamins may be low in people starting treatment for active tuberculosis, there is currently no reliable evidence that routinely supplementing above recommended daily amounts has clinical benefits.”211 | PubMed suggestion |

1. Hawton K, Ratnayeke L, Simkin S, et al. Evaluation of acceptability and use of lockable storage devices for pesticides in Sri Lanka that might assist in prevention of self-poisoning. *BMC public health* 2009;9(1):69.

2. Organization WH. Safer access to pesticides: experiences from community interventions, 2016.

3. Organization WH. Guns, knives, and pesticides: reducing access to lethal means. 2009

4. Vloothuis JD, van Wegen EE, Veerbeek JM, et al. Caregiver-mediated exercises for improving outcomes after stroke. *Cochrane Database Syst Rev* 2014

5. Hudetz J, Iqbal Z, Gandhi S, et al. Ketamine attenuates post‐operative cognitive dysfunction after cardiac surgery. *Acta Anaesthesiologica Scandinavica* 2009;53(7):864-72.

6. Mu JL, Lee A, Joynt GM. Pharmacologic agents for the prevention and treatment of delirium in patients undergoing cardiac surgery: systematic review and metaanalysis. *Critical care medicine* 2015;43(1):194-204.

7. Bhatt S, Gething PW, Brady OJ, et al. The global distribution and burden of dengue. *Nature* 2013;496(7446):504.

8. Lee T-H, Wong JG, Leo Y-S, et al. Potential harm of prophylactic platelet transfusion in adult dengue patients. *PLoS neglected tropical diseases* 2016;10(3):e0004576.

9. Whitehorn J, Roche RR, Guzman MG, et al. Prophylactic platelets in dengue: survey responses highlight lack of an evidence base. *PLoS neglected tropical diseases* 2012;6(6):e1716.

10. Lee DJ, Warner CH, Hoge CW. Advances and controversies in military posttraumatic stress disorder screening. *Current psychiatry reports* 2014;16(9):467. doi: 10.1007/s11920-014-0467-7 [published Online First: 2014/07/16]

11. Zamorski MA, Rusu C, Garber BG. Prevalence and correlates of mental health problems in canadian forces personnel who deployed in support of the mission in Afghanistan: Findings from postdeployment Screenings, 2009–2012. *The Canadian Journal of Psychiatry* 2014;59(6):319-26.

12. Vermetten E, Greenberg N, Boeschoten MA, et al. Deployment-related mental health support: comparative analysis of NATO and allied ISAF partners. *European Journal of Psychotraumatology* 2014;5(1):23732.

13. Thomsen HS. European Society of Urogenital Radiology guidelines on contrast media application. *Current opinion in urology* 2007;17(1):70-76.

14. National CGCU. Acute Kidney Injury: Prevention, Detection and Management Up to the Point of Renal Replacement Therapy. 2013

15. Mayfield S, Bogossian F, O'malley L, et al. High‐flow nasal cannula oxygen therapy for infants with bronchiolitis: Pilot study. *Journal of paediatrics and child health* 2014;50(5):373-78.

16. Hough JL, Shearman AD, Jardine LA, et al. Humidified high flow nasal cannulae: current practice in Australasian nurseries, a survey. *Journal of paediatrics and child health* 2012;48(2):106-13.

17. Roehr CC, Yoder BA, Davis PG, et al. Evidence Support and guidelines for using heated, humidified, high-flow nasal cannulae in neonatology. *Clinics in perinatology* 2016;43(4):693-705.

18. Monro-Somerville T, Sim M, Ruddy J, et al. The effect of high-flow nasal cannula oxygen therapy on mortality and intubation rate in acute respiratory failure: a systematic review and meta-analysis. *Critical care medicine* 2017;45(4):e449-e56.

19. Serruys PW, Chevalier B, Sotomi Y, et al. Comparison of an everolimus-eluting bioresorbable scaffold with an everolimus-eluting metallic stent for the treatment of coronary artery stenosis (ABSORB II): a 3 year, randomised, controlled, single-blind, multicentre clinical trial. *The Lancet* 2016;388(10059):2479-91.

20. Onuma Y, Ormiston J, Serruys PW. Bioresorbable scaffold technologies. *Circulation Journal* 2011;75(3):509-20.

21. Mahmoud AN, Barakat AF, Elgendy AY, et al. Long-term efficacy and safety of everolimus-eluting bioresorbable vascular scaffolds versus everolimus-eluting metallic stents: a meta-analysis of randomized trials. *Circulation: Cardiovascular Interventions* 2017;10(5):e005286.

22. Lacerda-Filho A, Silva RGd. Stapled hemorrhoidectomy: present status. *Arquivos de gastroenterologia* 2005;42(3):191-94.

23. Nisar PJ, Acheson AG, Neal KR, et al. Stapled hemorrhoidopexy compared with conventional hemorrhoidectomy: systematic review of randomized, controlled trials. *Diseases of the colon & rectum* 2004;47(11):1837-45.

24. Lumb KJ, Colquhoun PH, Malthaner R, et al. Stapled versus conventional surgery for hemorrhoids. *The Cochrane Library* 2006

25. Burch J, Epstein D, Baba-Akbari A, et al. Stapled haemorrhoidectomy (haemorrhoidopexy) for the treatment of haemorrhoids: a systematic review and economic evaluation. *HEALTH TECHNOLOGY ASSESSMENT-SOUTHAMPTON-* 2008;12(8)

26. Fogg B, Cuellar G, Danielson D. Motivating, influencing, and persuading users: An introduction to captology. *Human Computer Interaction Fundamentals* 2009:109-22.

27. Site HIS. Working to Find and advance solutions to environment, health, poverty, and development problems. Realityworks infant simulator and RealCare Parenting Program 2011 [Available from: <http://www.solutions-site.org/node/222>.

28. it RLiL. Live it Learn it Experiential Learning Technology. 2012 [Available from: <https://www.realityworks.com/news-events/8-Realityworks-Releases-New-Version-of-RealCare-Baby>.

29. Pollack A. For some, aspirin may not help hearts. *New York Times* 2004

30. Gurbel PA, Becker RC, Mann KG, et al. Platelet function monitoring in patients with coronary artery disease. *Journal of the American College of Cardiology* 2007;50(19):1822-34.

31. Aradi D, Storey RF, Komócsi A, et al. Expert position paper on the role of platelet function testing in patients undergoing percutaneous coronary intervention. *European heart journal* 2014;35(4):209.

32. Choi J-L, Li S, Han J-Y. Platelet function tests: a review of progresses in clinical application. *BioMed research international* 2014;2014

33. Xing Z, Tang L, Zhu Z, et al. Platelet reactivity-adjusted antiplatelet therapy in patients with percutaneous coronary intervention: a meta-analysis of randomized controlled trials. *Platelets* 2017:1-7.

34. Chao JH, Phillips R, Nickson JJ. Roentgen‐ray therapy of cerebral metastases. *Cancer* 1954;7(4):682-89.

35. Order SE, Hellmän S, Von Essen CF, et al. Improvement in quality of survival following whole-brain irradiation for brain metastasis. *Radiology* 1968;91(1):149-53.

36. Tsao MN, Xu W, Wong RK, et al. Whole brain radiotherapy for the treatment of newly diagnosed multiple brain metastases. *The Cochrane Library* 2018

37. Binder J, Kramer W. Robotically‐assisted laparoscopic radical prostatectomy. *BJU international* 2001;87(4):408-10.

38. Yaxley JW, Coughlin GD, Chambers SK, et al. Robot-assisted laparoscopic prostatectomy versus open radical retropubic prostatectomy: early outcomes from a randomised controlled phase 3 study. *The Lancet* 2016;388(10049):1057-66.

39. Ilic D, Evans SM, Allan CA, et al. Laparoscopic and robot‐assisted vs open radical prostatectomy for the treatment of localized prostate cancer: a Cochrane systematic review. *BJU international* 2017

40. Peytel E, Menegaux F, Cluzel P, et al. Initial imaging assessment of severe blunt trauma. *Intensive care medicine* 2001;27(11):1756-61.

41. Leidner B, Beckman M. Standardized whole-body computed tomography as a screening tool in blunt multitrauma patients. *Emergency Radiology* 2001;8(1):20-28.

42. Chidambaram S, Goh EL, Khan MA. A meta-analysis of the efficacy of whole-body computed tomography imaging in the management of trauma and injury. *Injury* 2017

43. Lovelock C, Molyneux A, Rothwell P. Change in incidence and aetiology of intracerebral haemorrhage in Oxfordshire, UK, between 1981 and 2006: a population-based study. *The Lancet Neurology* 2007;6(6):487-93.

44. Baharoglu MI, Cordonnier C, Salman RA-S, et al. Platelet transfusion versus standard care after acute stroke due to spontaneous cerebral haemorrhage associated with antiplatelet therapy (PATCH): a randomised, open-label, phase 3 trial. *The Lancet* 2016;387(10038):2605-13.

45. Leong LB, David TKP. Is platelet transfusion effective in patients taking antiplatelet agents who suffer an intracranial hemorrhage? *The Journal of emergency medicine* 2015;49(4):561-72.

46. El-Toukhy T, Campo R, Khalaf Y, et al. Hysteroscopy in recurrent in-vitro fertilisation failure (TROPHY): a multicentre, randomised controlled trial. *The Lancet* 2016;387(10038):2614-21.

47. El-Toukhy T, Sunkara SK, Coomarasamy A, et al. Outpatient hysteroscopy and subsequent IVF cycle outcome: a systematic review and meta-analysis. *Reproductive biomedicine online* 2008;16(5):712-19.

48. Medicine PCotASfR. Diagnostic evaluation of the infertile female: a committee opinion. *Fertility and sterility* 2012;98(2):302-07.

49. Bosteels J, Kasius J, Weyers S, et al. Hysteroscopy for treating subfertility associated with suspected major uterine cavity abnormalities. *The Cochrane Library* 2015

50. Morris JM, Roberts CL, Bowen JR, et al. Immediate delivery compared with expectant management after preterm pre-labour rupture of the membranes close to term (PPROMT trial): a randomised controlled trial. *The Lancet*;387(10017):444-52. doi: 10.1016/S0140-6736(15)00724-2

51. Premature rupture of the membranes: neonatal consequences. Seminars in perinatology; 1996. Elsevier.

52. Bond DM, Middleton P, Levett KM, et al. Planned early birth versus expectant management for women with preterm prelabour rupture of membranes prior to 37 weeks' gestation for improving pregnancy outcome. *The Cochrane Library* 2017

53. Robling M, Bekkers M-J, Bell K, et al. Effectiveness of a nurse-led intensive home-visitation programme for first-time teenage mothers (Building Blocks): a pragmatic randomised controlled trial. 2016;387(10014):146-55.

54. Olds DL. The nurse-family partnership: An evidence-based preventive intervention. *Infant mental health journal* 2006;27(1):5-25. doi: 10.1002/imhj.20077 [published Online First: 2006/01/01]

55. Svilaas T, Vlaar PJ, van der Horst IC, et al. Thrombus aspiration during primary percutaneous coronary intervention. *New England Journal of Medicine* 2008;358(6):557-67.

56. Vlaar PJ, Svilaas T, van der Horst IC, et al. Cardiac death and reinfarction after 1 year in the Thrombus Aspiration during Percutaneous coronary intervention in Acute myocardial infarction Study (TAPAS): a 1-year follow-up study. *The Lancet* 2008;371(9628):1915-20.

57. Fröbert O, Lagerqvist B, Olivecrona GK, et al. Thrombus aspiration during ST-segment elevation myocardial infarction. *New England journal of medicine* 2013;369(17):1587-97.

58. Lagerqvist B, Fröbert O, Olivecrona GK, et al. Outcomes 1 year after thrombus aspiration for myocardial infarction. *New England Journal of Medicine* 2014;371(12):1111-20.

59. Kushner FG, Hand M, Smith SC, et al. 2009 Focused Updates: ACC/AHA Guidelines for the Management of Patients With ST‐Elevation Myocardial Infarction (Updating the 2004 Guideline and 2007 Focused Update) and ACC/AHA/SCAI Guidelines on Percutaneous Coronary Intervention (Updating the 2005 Guideline and 2007 Focused Update). *Catheterization and Cardiovascular Interventions* 2009;74(7)

60. Costopoulos C, Gorog DA, Di Mario C, et al. Use of thrombectomy devices in primary percutaneous coronary intervention: a systematic review and meta-analysis. *International journal of cardiology* 2013;163(3):229-41.

61. Elgendy AY, Elgendy IY, Mahmoud AN, et al. Long‐term outcomes with aspiration thrombectomy for patients undergoing primary percutaneous coronary intervention: A meta‐analysis of randomized trials. *Clinical Cardiology* 2017

62. Marik PE. Aspiration pneumonitis and aspiration pneumonia. *New England Journal of Medicine* 2001;344(9):665-71.

63. Westendorp WF, Vermeij JD, Vermeij F, et al. Antibiotic therapy for preventing infections in patients with acute stroke. *The Cochrane Library* 2012

64. Vermeij JD, Westendorp WF, Dippel DW, et al. Antibiotic therapy for preventing infections in people with acute stroke. *The Cochrane Library* 2018

65. D'Haens G, Baert F, Van Assche G, et al. Early combined immunosuppression or conventional management in patients with newly diagnosed Crohn's disease: an open randomised trial. *The Lancet* 2008;371(9613):660-67.

66. Colombel JF, Sandborn WJ, Reinisch W, et al. Infliximab, azathioprine, or combination therapy for Crohn's disease. *New England Journal of Medicine* 2010;362(15):1383-95.

67. Travis S, Stange E, Lemann M, et al. European evidence based consensus on the diagnosis and management of Crohn’s disease: current management. *Gut* 2006;55(suppl 1):i16-i35.

68. Dignass A, Van Assche G, Lindsay J, et al. The second European evidence-based consensus on the diagnosis and management of Crohn's disease: current management. *Journal of Crohn's and Colitis* 2010;4(1):28-62.

69. Horrocks E, Thin N, Thaha M, et al. Systematic review of tibial nerve stimulation to treat faecal incontinence. *British Journal of Surgery* 2014;101(5):457-68.

70. Leroi A, Siproudhis L, Etienney I, et al. Transcutaneous electrical tibial nerve stimulation in the treatment of fecal incontinence: a randomized trial (CONSORT 1a). *The American journal of gastroenterology* 2012;107(12):1888-96.

71. Hotouras A, Thaha M, Allison M, et al. Percutaneous tibial nerve stimulation (PTNS) in females with faecal incontinence: the impact of sphincter morphology and rectal sensation on the clinical outcome. *International journal of Colorectal disease* 2012;27(7):927-30.

72. Edenfield AL, Amundsen CL, Wu JM, et al. Posterior tibial nerve stimulation for the treatment of fecal incontinence: a systematic evidence review. *Obstetrical & gynecological survey* 2015;70(5):329-41.

73. Sauerland S, Nagelschmidt M, Mallmann P, et al. Risks and benefits of preoperative high dose methylprednisolone in surgical patients. *Drug Safety* 2000;23(5):449-61.

74. Chaney MA. Corticosteroids and cardiopulmonary bypass: a review of clinical investigations. *Chest* 2002;121(3):921-31.

75. Ali-Hassan-Sayegh S, Mirhosseini SJ, Haddad F, et al. Protective effects of corticosteroids in coronary artery bypass graft surgery alone or combined with valvular surgery: an updated and comprehensive meta-analysis and systematic review. *Interactive cardiovascular and thoracic surgery* 2015;20(6):825-36.

76. Campschroer T, Zhu Y, Duijvesz D, et al. Alpha‐blockers as medical expulsive therapy for ureteral stones. *The Cochrane Library* 2014

77. Seitz C, Liatsikos E, Porpiglia F, et al. Medical therapy to facilitate the passage of stones: what is the evidence? *European urology* 2009;56(3):455-71.

78. Wang H, Man LB, Huang GL, et al. Comparative efficacy of tamsulosin versus nifedipine for distal ureteral calculi: a meta-analysis. *Drug design, development and therapy* 2016;10:1257.

79. Hollingsworth JM, Canales BK, Rogers MA, et al. Alpha blockers for treatment of ureteric stones: systematic review and meta-analysis. *bmj* 2016;355:i6112.

80. Bernhardt J, Langhorne P, Lindley RI, et al. Efficacy and safety of very early mobilisation within 24 h of stroke onset (AVERT): a randomised controlled trial. 2015;386(9988):46-55.

81. Xu T, Yu X, Ou S, et al. Efficacy and Safety of Very Early Mobilization in Patients with Acute Stroke: A Systematic Review and Meta-analysis. *Scientific reports* 2017;7(1):6550.

82. Strom BL, Schinnar R, Aberra F, et al. Unintended effects of a computerized physician order entry nearly hard-stop alert to prevent a drug interaction: a randomized controlled trial. *Archives of internal medicine* 2010;170(17):1578-83.

83. Strom BL, Schinnar R, Bilker W, et al. Randomized clinical trial of a customized electronic alert requiring an affirmative response compared to a control group receiving a commercial passive CPOE alert: NSAID—warfarin co-prescribing as a test case. *Journal of the American Medical Informatics Association* 2010;17(4):411-15.

84. Kucher N, Koo S, Quiroz R, et al. Electronic alerts to prevent venous thromboembolism among hospitalized patients. *N Engl j Med* 2005;2005(352):969-77.

85. Dexter PR, Perkins S, Overhage JM, et al. A computerized reminder system to increase the use of preventive care for hospitalized patients. *New England Journal of Medicine* 2001;345(13):965-70.

86. Selby NM, Crowley L, Fluck RJ, et al. Use of electronic results reporting to diagnose and monitor AKI in hospitalized patients. *Clinical Journal of the American Society of Nephrology* 2012;7(4):533-40.

87. Porter CJ, Juurlink I, Bisset LH, et al. A real-time electronic alert to improve detection of acute kidney injury in a large teaching hospital. *Nephrology Dialysis Transplantation* 2014;29(10):1888-93.

88. Colpaert K, Hoste EA, Steurbaut K, et al. Impact of real-time electronic alerting of acute kidney injury on therapeutic intervention and progression of RIFLE class. *Critical care medicine* 2012;40(4):1164-70.

89. Haase M, Kribben A, Zidek W, et al. Electronic Alerts for Acute Kidney Injury: A Systematic Review. *Deutsches Ärzteblatt International* 2017;114(1-2):1.

90. Okumu FO, Mbeyela E, Lingamba G, et al. Comparative field evaluation of combinations of long-lasting insecticide treated nets and indoor residual spraying, relative to either method alone, for malaria prevention in an area where the main vector is Anopheles arabiensis. *Parasites & vectors* 2013;6(1):46.

91. Fullman N, Burstein R, Lim SS, et al. Nets, spray or both? The effectiveness of insecticide-treated nets and indoor residual spraying in reducing malaria morbidity and child mortality in sub-Saharan Africa. *Malaria journal* 2013;12(1):62.

92. Kleinschmidt I, Schwabe C, Shiva M, et al. Combining indoor residual spraying and insecticide-treated net interventions. *The American journal of tropical medicine and hygiene* 2009;81(3):519-24.

93. Feng J. The Effect of Combining Insecticide Treated Nets and Indoor Residual Spraying for Vector Control of Malaria: A Systematic Review, 2017.

94. Imdad A, Ahmed Z, Bhutta ZA. Vitamin A supplementation for the prevention of morbidity and mortality in infants one to six months of age. *The Cochrane Library* 2016

95. Gogia S, Sachdev HS. Vitamin A supplementation for the prevention of morbidity and mortality in infants six months of age or less. *Cochrane Database Syst Rev* 2011;10

96. Organization WH. Report of the WHO technical consultation on neonatal vitamin A supplementation research priorities, Geneva, Switzerland, 4-5 December 2008, 2009.

97. Ross DA. Recommendations for vitamin A supplementation. *The Journal of nutrition* 2002;132(9):2902S-06S.

98. Haider BA, Sharma R, Bhutta ZA. Neonatal vitamin A supplementation for the prevention of mortality and morbidity in term neonates in low and middle income countries. *The Cochrane Library* 2017

99. World Health Organization G. The selection and use of essential medicines: report of the WHO Expert Committee, 2013 (including the 18th WHO Model List of Essential Medicines and the 4th WHO Model List of Essentials Medicines for Children). , 2013.

100. Costello A, Azad K. Scaling up antenatal corticosteroids in low-resource settings? *The Lancet* 2015;385(9968):585-87.

101. Lawn J, Segrè J, Buekens P, et al. Antenatal corticosteroids for the reduction of deaths in preterm babies. *A case study prepared for the United Nation’s Commission on Commodities for Women’s and children’s health* 2012

102. Kupferminc MJ, Eldor A, Steinman N, et al. Increased frequency of genetic thrombophilia in women with complications of pregnancy. *New England Journal of Medicine* 1999;340(1):9-13.

103. Bates SM, Greer IA, Hirsh J, et al. Use of antithrombotic agents during pregnancy: the Seventh ACCP Conference on Antithrombotic and Thrombolytic Therapy. *Chest Journal* 2004;126(3_suppl):627S-44S.

104. Gris J-C, Mercier E, Quéré I, et al. Low-molecular-weight heparin versus low-dose aspirin in women with one fetal loss and a constitutional thrombophilic disorder. *Blood* 2004;103(10):3695-99.

105. Brenner B, Hoffman R, Carp H, et al. Efficacy and safety of two doses of enoxaparin in women with thrombophilia and recurrent pregnancy loss: the LIVE‐ENOX study. *Journal of Thrombosis and Haemostasis* 2005;3(2):227-29.

106. Skeith L, Carrier M, Kaaja R, et al. A meta-analysis of low-molecular-weight heparin to prevent pregnancy loss in women with inherited thrombophilia. *Blood* 2016:blood-2015-12-626739.

107. Chou R, Qaseem A, Snow V, et al. Diagnosis and Treatment of Low Back Pain: A Joint Clinical Practice Guideline from the American College of Physicians and the American Pain SocietyDiagnosis and Treatment of Low Back Pain. *Annals of internal medicine* 2007;147(7):478-91.

108. Koes BW, van Tulder M, Lin C-WC, et al. An updated overview of clinical guidelines for the management of non-specific low back pain in primary care. *European Spine Journal* 2010;19(12):2075-94.

109. Machado GC, Maher CG, Ferreira PH, et al. Efficacy and safety of paracetamol for spinal pain and osteoarthritis: systematic review and meta-analysis of randomised placebo controlled trials. *bmj* 2015;350:h1225.

110. Lee YG. Surgical resection of mesothelioma: an evidence-free practice. *The Lancet* 2014;384(9948):1080-81.

111. Nakas A, Martin Ucar AE, Edwards JG, et al. The role of video assisted thoracoscopic pleurectomy/decortication in the therapeutic management of malignant pleural mesothelioma. *European Journal of Cardio-Thoracic Surgery* 2008;33(1):83-88.

112. Halstead J, Lim E, Venkateswaran R, et al. Improved survival with VATS pleurectomy-decortication in advanced malignant mesothelioma. *European Journal of Surgical Oncology (EJSO)* 2005;31(3):314-20.

113. Lewis RJ, Caccavale RJ, Sisler GE, et al. One hundred consecutive patients undergoing video-assisted thoracic operations. *The Annals of thoracic surgery* 1992;54(3):421-26.

114. Clive AO, Jones HE, Bhatnagar R, et al. Interventions for the management of malignant pleural effusions: a network meta‐analysis. *The Cochrane Library* 2016

115. Wiesen J, Ornstein M, Tonelli AR, et al. State of the evidence: mechanical ventilation with PEEP in patients with cardiogenic shock. *Heart* 2013;99(24):1812-17.

116. Duggan M, Kavanagh BP. Pulmonary AtelectasisA Pathogenic Perioperative Entity. *The Journal of the American Society of Anesthesiologists* 2005;102(4):838-54.

117. Halter JM, Steinberg JM, Schiller HJ, et al. Positive end-expiratory pressure after a recruitment maneuver prevents both alveolar collapse and recruitment/derecruitment. *American journal of respiratory and critical care medicine* 2003;167(12):1620-26.

118. Zaky A, Lang JD. The use of intraoperative positive end expiratory pressure. *J Anesthe Clinic Res* 2011;4(308):2.

119. Barbosa FT, Castro AA, de Sousa‐Rodrigues CF. Positive end‐expiratory pressure (PEEP) during anaesthesia for prevention of mortality and postoperative pulmonary complications. *The Cochrane Library* 2014

120. Van Rheenen P. Delayed cord clamping and improved infant outcomes: British Medical Journal Publishing Group, 2011.

121. Barrios JZ, Albornoz G, Musante G, et al. Timing of umbilical cord clamping of term infants in a large maternity center in Buenos Aires. *Journal of Perinatal Medicine* 2011;39

122. Committee SA. Clamping of the umbilical cord and placental transfusion. *London: RCOG* 2009

123. Airey RJ, Farrar D, Duley L. Alternative positions for the baby at birth before clamping the umbilical cord. *Cochrane Database Syst Rev* 2010(10):Cd007555. doi: 10.1002/14651858.CD007555.pub2 [published Online First: 2010/10/12]

124. Mercer JS, Nelson CC, Skovgaard RL. Umbilical cord clamping: Beliefs and practices of American nurse‐midwives. *Journal of Midwifery & Women’s Health* 2000;45(1):58-66.

125. Sterling M. Clinical guidelines for best practice management of acute and chronic whiplash-associated disorders. 2008

126. Stewart MJ, Maher CG, Refshauge KM, et al. Randomized controlled trial of exercise for chronic whiplash-associated disorders. *Pain* 2007;128(1):59-68.

127. Lamb SE, Gates S, Williams MA, et al. Emergency department treatments and physiotherapy for acute whiplash: a pragmatic, two-step, randomised controlled trial. *The Lancet* 2013;381(9866):546-56.

128. Wiangkham T, Duda J, Haque M, et al. Effectiveness of conservative treatment in acute whiplash associated disorder (WAD) II: a systematic review and meta-analysis of randomised controlled trials. *Physiotherapy* 2015;101:e1623-e24.

129. Kearon C, Akl EA, Comerota AJ, et al. Antithrombotic therapy for VTE disease: antithrombotic therapy and prevention of thrombosis: American College of Chest Physicians evidence-based clinical practice guidelines. *Chest Journal* 2012;141(2_suppl):e419S-e94S.

130. Brandjes DP, Büller HR, Heijboer H, et al. Randomised trial of effect of compression stockings in patients with symptomatic proximal-vein thrombosis. *The Lancet* 1997;349(9054):759-62.

131. Prandoni P, Lensing AW, Prins MH, et al. Below-Knee Elastic Compression Stockings To Prevent the Post-Thrombotic SyndromeA Randomized, Controlled Trial. *Annals of Internal Medicine* 2004;141(4):249-56.

132. Kahn S, Elman E, Rodger M, et al. Use of elastic compression stockings after deep venous thrombosis: a comparison of practices and perceptions of thrombosis physicians and patients. *Journal of Thrombosis and Haemostasis* 2003;1(3):500-06.

133. Appelen D, van Loo E, Prins MH, et al. Compression therapy for prevention of post‐thrombotic syndrome. *The Cochrane Library* 2017

134. Ajiboye N, Chalouhi N, Starke RM, et al. Cerebral arteriovenous malformations: evaluation and management. *The Scientific World Journal* 2014;2014

135. van Beijnum J, van der Worp HB, Buis DR, et al. Treatment of brain arteriovenous malformations: a systematic review and meta-analysis. *Jama* 2011;306(18)

136. Hartmann A, Mast H, Mohr JP, et al. Determinants of staged endovascular and surgical treatment outcome of brain arteriovenous malformations. *Stroke* 2005;36(11):2431-35.

137. Bederson JB, Awad IA, Wiebers DO, et al. Recommendations for the management of patients with unruptured intracranial aneurysms. *Stroke* 2000;31(11):2742-50.

138. Currow DC, Abernethy AP. Lessons from the Liverpool Care Pathway--evidence is key. *The Lancet* 2014;383(9913):192.

139. Jack BA, Gambles M, Murphy D, et al. Nurses' perceptions of the Liverpool Care Pathway for the dying patient in the acute hospital setting. *International journal of palliative nursing* 2003;9(9)

140. Di Leo S, Beccaro M, Finelli S, et al. Expectations about and impact of the Liverpool Care Pathway for the dying patient in an Italian hospital. *Palliative medicine* 2011;25(4):293-303.

141. Veerbeek L, van Zuylen L, Swart SJ, et al. The effect of the Liverpool Care Pathway for the dying: a multi-centre study. *Palliative Medicine* 2008;22(2):145-51.

142. Chan R, Webster J. End-of-life care pathways for improving outcomes in caring for the dying. *Cochrane Database Syst Rev* 2010;1

143. Kalra L, Evans A, Perez I, et al. Training carers of stroke patients: randomised controlled trial. *Bmj* 2004;328(7448):1099.

144. Stevenson D. Training informal caregivers of patients with stroke improved patient and caregiver quality of life and reduced costs. *Evidence-based nursing* 2004;7(4):118.

145. Wang Y, Yang F, Shi H, et al. What Type of Transitional Care Effectively Reduced Mortality and Improved ADL of Stroke Patients? A Meta-Analysis. *International journal of environmental research and public health* 2017;14(5):510.

146. Thiele H, Allam B, Chatellier G, et al. Shock in acute myocardial infarction: the Cape Horn for trials? 2010;31(15):1828-35.

147. Wan Y-D, Sun T-W, Kan Q-C, et al. The effects of intra-aortic balloon pumps on mortality in patients undergoing high-risk coronary revascularization: a meta-analysis of randomized controlled trials of coronary artery bypass grafting and stenting era. *PloS one* 2016;11(1):e0147291.

148. Golub J, Mohan C, Comstock G, et al. Active case finding of tuberculosis: historical perspective and future prospects. *The International Journal of Tuberculosis and Lung Disease* 2005;9(11):1183-203.

149. Mhimbira FA, Cuevas LE, Dacombe R, et al. Interventions to increase tuberculosis case detection at primary healthcare or community‐level services. *The Cochrane Library* 2017

150. Organization WH. WHO Multi-Country Study on Women’s Health and Domestic Violence: Domestic Violence Module. *Geneva: Author Retrieved November* 2005;29:2006.

151. Nelson HD, Bougatsos C, Blazina I. Screening women for intimate partner violence: a systematic review to update the US Preventive Services Task Force recommendation. *Annals of internal medicine* 2012;156(11):796-808.

152. Bridle C, Spanjers K, Patel S, et al. Effect of exercise on depression severity in older people: systematic review and meta-analysis of randomised controlled trials. *The British Journal of Psychiatry* 2012;201(3):180-85.

153. Craft LL, Perna FM. The benefits of exercise for the clinically depressed. *Primary care companion to the Journal of clinical psychiatry* 2004;6(3):104.

154. Potter R, Ellard D, Rees K, et al. A systematic review of the effects of physical activity on physical functioning, quality of life and depression in older people with dementia. *International journal of geriatric psychiatry* 2011;26(10):1000-11.

155. Blumenthal JA, Babyak MA, Moore KA, et al. Effects of exercise training on older patients with major depression. *Archives of internal medicine* 1999;159(19):2349-56.

156. Fulton JE, Kohl HW. 2008 physical activity guidelines for Americans; be active, healthy, and happy! 2008

157. Ekkekakis P. Honey, I shrunk the pooled SMD! Guide to critical appraisal of systematic reviews and meta-analyses using the Cochrane review on exercise for depression as example. *Mental health and physical activity* 2015;8:21-36.

158. Steadman HJ, Gounis K, Dennis D, et al. Assessing the New York City involuntary outpatient commitment pilot program. *Psychiatric Services* 2001;52(3):330-36.

159. Swartz MS, Swanson JW, Wagner HR, et al. Can involuntary outpatient commitment reduce hospital recidivism?: findings from a randomized trial with severely mentally ill individuals. *American Journal of Psychiatry* 1999;156(12):1968-75.

160. Kisely SR, Campbell LA, Preston NJ. Compulsory community and involuntary outpatient treatment for people with severe mental disorders. *Cochrane Database of Systematic Reviews* 2005(3 Article No: CD004408):1-25.

161. Taylor-Robinson DC, Maayan N, Soares-Weiser K, et al. Deworming drugs for soil-transmitted intestinal worms in children: effects on nutritional indicators, haemoglobin and school performance. *Cochrane Database Syst Rev* 2012;11(7)

162. Taylor-Robinson D, Jones A, Garner P. Does deworming improve growth and school performance in children? *PLoS neglected tropical diseases* 2009;3(1):e358.

163. Bundy DA, Kremer M, Bleakley H, et al. Deworming and development: asking the right questions, asking the questions right. *PLoS Neglected Tropical Diseases* 2009;3(1):e362.

164. Organization WH. Prevention and control of schistosomiasis and soil-transmitted helminthiasis: report of a WHO expert committee. 2002

165. Thayer WM, Clermont A, Walker N. Effects of deworming on child and maternal health: a literature review and meta-analysis. *BMC public health* 2017;17(4):830.

166. Windecker S, Serruys PW, Wandel S, et al. Biolimus-eluting stent with biodegradable polymer versus sirolimus-eluting stent with durable polymer for coronary revascularisation (LEADERS): a randomised non-inferiority trial. *The Lancet* 2008;372(9644):1163-73.

167. Systems TI. Terumo receives CE Certificate for Nobori™ Drug-Eluting Stent 2008 [Available from: <https://www.terumo-europe.com/en-emea/news/terumo-receives-ce-certificate-for-nobori%E2%84%A2-drug-eluting-stent> accessed 01/22/2018.

168. Zhang Y-J, Zhu L-L, Bourantas CV, et al. The impact of everolimus versus other rapamycin derivative-eluting stents on clinical outcomes in patients with coronary artery disease: A meta-analysis of 16 randomized trials. *Journal of cardiology* 2014;64(3):185-93.

169. Hurwitz EL, Carragee EJ, van der Velde G, et al. Treatment of neck pain: noninvasive interventions: results of the Bone and Joint Decade 2000-2010 Task Force on Neck Pain and Its Associated Disorders. *Spine* 2008;33(4 Suppl):S123-52. doi: 10.1097/BRS.0b013e3181644b1d [published Online First: 2008/02/07]

170. Verhagen AP, Scholten-Peeters GG, van Wijngaarden S, et al. Conservative treatments for whiplash. *Cochrane Database Syst Rev* 2007(2):Cd003338. doi: 10.1002/14651858.CD003338.pub3 [published Online First: 2007/04/20]

171. McClune T, Burton AK, Waddell G. Evaluation of an evidence based patient educational booklet for management of whiplash associated disorders. *Emergency medicine journal : EMJ* 2003;20(6):514-7. [published Online First: 2003/11/19]

172. Amazon. 2018 [1/22/2018]. Available from: <https://www.amazon.com/Whiplash-Book-US-Canada-copies/dp/0117033251>.

173. Ferrari R, Rowe BH, Majumdar SR, et al. Simple educational intervention to improve the recovery from acute whiplash: results of a randomized, controlled trial. *Academic emergency medicine* 2005;12(8):699-706.

174. Could a simple educational intervention modify beliefs about whiplash? A preliminary study among professionals working in a rehabilitation ward. Annales de réadaptation et de médecine physique; 2007. Elsevier.

175. Bertozzi L, Gardenghi I, Turoni F, et al. Effect of therapeutic exercise on pain and disability in the management of chronic nonspecific neck pain: systematic review and meta-analysis of randomized trials. *Physical therapy* 2013;93(8):1026-36.

176. Gross A, Kay TM, Paquin JP, et al. Exercises for mechanical neck disorders. *The Cochrane Library* 2015

177. Brosnahan J, Jull A, Tracy C. Types of urethral catheters for management of short‐term voiding problems in hospitalised adults. *The Cochrane Library* 2004

178. Schumm K, Lam T. Types of urethral catheters for management of short-term voiding problems in hospitalised adults. *Cochrane Database Syst Rev* 2008;2(2)

179. Mainous AG, Tanner RJ, Baker R, et al. Prevalence of prediabetes in England from 2003 to 2011: population-based, cross-sectional study. *BMJ open* 2014;4(6):e005002.

180. Echouffo-Tcheugui JB, Simmons RK, Williams KM, et al. The ADDITION-Cambridge trial protocol: a cluster–randomised controlled trial of screening for type 2 diabetes and intensive treatment for screen-detected patients. *BMC public health* 2009;9(1):136.

181. Autier P, Boniol M, Gavin A, et al. Breast cancer mortality in neighbouring European countries with different levels of screening but similar access to treatment: trend analysis of WHO mortality database. *Bmj* 2011;343:d4411.

182. Selph S, Dana T, Blazina I, et al. Screening for Type 2 Diabetes Mellitus: A Systematic Review for the US Preventive Services Task ForceScreening for Type 2 Diabetes Mellitus. *Annals of internal medicine* 2015;162(11):765-76.

183. World Health Organization G. Report of the Eighth Meeting of the WHO Alliance for the Global Elimination of Blinding Trachoma Geneva 29−30 March, 2004. GLOBAL ELIMINATION OF BLINDING TRACHOMA BY THE YEAR 2020 WORLD HEALTH ORGANIZATION Prevention of Blindness and Deafness WHO/PBD/GET/042

2004.

184. West SK, Munoz B, Mkocha H, et al. Infection with Chlamydia trachomatis after mass treatment of a trachoma hyperendemic community in Tanzania: a longitudinal study. *The Lancet* 2005;366(9493):1296-300.

185. Solomon AW, Holland MJ, Alexander ND, et al. Mass treatment with single-dose azithromycin for trachoma. *New England Journal of Medicine* 2004;351(19):1962-71.

186. Melese M, Alemayehu W, Lakew T, et al. Comparison of annual and biannual mass antibiotic administration for elimination of infectious trachoma. *Jama* 2008;299(7):778-84.

187. Lietman T, Porco T, Dawson C, et al. Global elimination of trachoma: how frequently should we administer mass chemotherapy? *Nature medicine* 1999;5(5):572.

188. Gill DA, Lakew T, Alemayehu W, et al. Complete elimination is a difficult goal for trachoma programs in severely affected communities. *Clinical infectious diseases* 2008;46(4):564-66.

189. Yang JL, Hong KC, Schachter J, et al. Detection of Chlamydia trachomatis ocular infection in trachoma-endemic communities by rRNA amplification. *Investigative ophthalmology & visual science* 2009;50(1):90-94.

190. Nelson JC, Delucchi K, Schneider LS. Efficacy of second generation antidepressants in late-life depression: a meta-analysis of the evidence. *The American Journal of Geriatric Psychiatry* 2008;16(7):558-67.

191. Doody R, Stevens J, Beck C, et al. Practice parameter: Management of dementia (an evidence-based review) Report of the Quality Standards Subcommittee of the American Academy of Neurology. *Neurology* 2001;56(9):1154-66.

192. Eccles M, Clarke J, Livingston M, et al. North of England evidence based guidelines development project: guideline for the primary care management of dementia. *BMJ: British Medical Journal* 1998;317(7161):802.

193. National Collaborating Centre for Mental H. National Institute for Health and Clinical Excellence: Guidance. Dementia: A NICE-SCIE Guideline on Supporting People With Dementia and Their Carers in Health and Social Care. Leicester (UK): British Psychological Society

The British Psychological Society & The Royal College of Psychiatrists. 2007.

194. Orgeta V, Tabet N, Nilforooshan R, et al. Efficacy of Antidepressants for Depression in Alzheimer's Disease: Systematic Review and Meta-Analysis. *Journal of Alzheimer's disease : JAD* 2017;58(3):725-33. doi: 10.3233/jad-161247 [published Online First: 2017/05/17]

195. Bourouma R, Chevet D, Michel F, et al. Treatment of idiopathic retroperitoneal fibrosis with tamoxifen. *Nephrology, dialysis, transplantation: official publication of the European Dialysis and Transplant Association-European Renal Association* 1997;12(11):2407-10.

196. Clark C, Vanderpool D, Preskitt J. The response of retroperitoneal fibrosis to tamoxifen. *Surgery* 1991;109(4):502-06.

197. Dedeoglu F, Rose CD, Athreya BH, et al. Successful treatment of retroperitoneal fibrosis with tamoxifen in a child. *The Journal of rheumatology* 2001;28(7):1693-95.

198. Wallace SA, Roe B, Williams K, et al. Bladder training for urinary incontinence in adults. *The Cochrane Library* 2004

199. Abrams P, Andersson K-E, Birder L, et al. Fourth International Consultation on Incontinence Recommendations of the International Scientific Committee: Evaluation and treatment of urinary incontinence, pelvic organ prolapse, and fecal incontinence. *Neurourology and urodynamics* 2010;29(1):213-40.

200. Anderson CA, Omar MI, Campbell SE, et al. Conservative management for postprostatectomy urinary incontinence. *The Cochrane Library* 2015

201. Adams HP, Del Zoppo G, Alberts MJ, et al. Guidelines for the early management of adults with ischemic stroke. *Circulation* 2007;115(20):e478-e534.

202. Geeganage C, Bath P, Geeganage C, et al. Interventions for deliberately altering blood pressure in acute stroke. *Cochrane Database Syst Rev* 2008;4(4)

203. Schrader J, Lüders S, Kulschewski A, et al. The ACCESS study. *Stroke* 2003;34(7):1699-703.

204. CenterWatch. Atacand (candesartan cilexetil) 2018 [Available from: <http://www.centerwatch.com/drug-information/fda-approved-drugs/drug/646/atacand-candesartan-cilexetil> accessed 1/22/2018.

205. Bath PM, Krishnan K. Interventions for deliberately altering blood pressure in acute stroke. *The Cochrane Library* 2014

206. Wang H, Tang Y, Rong X, et al. Effects of early blood pressure lowering on early and long-term outcomes after acute stroke: an updated meta-analysis. *PloS one* 2014;9(5):e97917.

207. Dini C, Bianchi A. The potential role of vitamin D for prevention and treatment of tuberculosis and infectious diseases. *Annali dell'Istituto superiore di sanita* 2012;48(3):319-27.

208. Martineau AR, Honecker FU, Wilkinson RJ, et al. Vitamin D in the treatment of pulmonary tuberculosis. *The Journal of steroid biochemistry and molecular biology* 2007;103(3):793-98.

209. Gwinup G, Randazzo G, Elias A. The influence of vitamin D intake on serum calcium in tuberculosis. *Acta endocrinologica* 1981;97(1):114-17.

210. Morcos M, Gabr A, Samuel S, et al. Vitamin D administration to tuberculous children and its value. *Bollettino chimico farmaceutico* 1998;137(5):157-64.

211. Grobler L, Nagpal S, Sudarsanam TD, et al. Nutritional supplements for people being treated for active tuberculosis. *The Cochrane Library* 2016

| **#** | **Article and Author** | **Primary Medical Discipline** | **Date and Journal** | **Summary** | **Systematic Review** | **Search terms** |
| --- | --- | --- | --- | --- | --- | --- |
| 58 | Early versus delayed treatment of relapsed ovarian cancer (MRC OV05/EORTC 55955): a randomised trial Rustin et al. | Oncology | 10/2/2010  LANCET | The serum tumor marker CA125 is often used for initial diagnosis of ovarian cancer and for the monitoring of response to chemotherapy for epithelial ovarian cancer. CA125 often rises before the recurrence of ovarian cancer, and as such, guidelines recommend the testing for CA125 as part of follow-up care.1 The 1442 subjects in this trial were women with complete ovarian cancer remission after first-line platinum-based chemotherapy and a normal CA125 concentration. If the CA125 concentration exceeded twice the upper limit of normal (n=436), patients were randomly assigned to early (n=265) or delayed (n=264) chemotherapy. They found no difference in overall survival between the early (186 deaths) and delayed (184 deaths). This is a reversal of the use of CA125 as a tool for determining timing of chemotherapy in women with ovarian cancer who have been in remission. | 2016. Cochrane review. “Limited evidence from a single trial suggests that routine surveillance with CA125 in asymptomatic patients and treatment at CA125 relapse does not seem to offer survival advantage when compared to treatment at symptomatic relapse. RCTs are needed to compare different types of follow-up, looking at survival, QoL [quality of life], cost and psychological effects as outcomes.”2 | pubMed suggestion |
| 59 | Effect of palliative oxygen versus room air in relief of breathlessness in patients with refractory dyspnoea: a double-blind, randomised controlled trial Abernethy et al. | Pulmonary Disease | 9/4/2010  LANCET | Patients with various neurological conditions can sometimes become breathless.3 4 Oxygen therapy is often used to manage breathlessness. However, although there is accepted evidence for using oxygen in patients with COPD and hypoxemia,5 palliative oxygen is often used in patients with advanced life-limiting illness, irrespective of the partial pressure of oxygen in arterial blood (PaO2). This study randomized 239 subjects that had life-limiting illness, refractory dyspnea, and partial pressure of oxygen in arterial blood more than 7.3 kPa to either receive oxygen (n=120) or room air (n=119) via a concentrator through a nasal cannula at 2 L per minutes for 7 days. They found that oxygen delivered by cannula provides no additional symptomatic benefit for relief of refractory dyspnea. From baseline to day 6, mean morning breathlessness change by -0.9 points (95% CI: -1.3 to -0.5) in the oxygen group and -0.7 points (-1.2 to -0.2) in the room air group (p = 0.504). This is a reversal of the use of palliative oxygen as a way to relieve breathlessness in patients with refractory dyspnea. | 2016. Cochrane review. “Most evidence pertains to acute effects during exercise tests, and no evidence indicates that oxygen decreases breathlessness in the daily life setting. Findings show that oxygen does not affect health-related quality of life.”6 | pubMed suggestion |
| 60 | Misoprostol as an adjunct to standard uterotonics for treatment of post-partum haemorrhage: a multicentre, double-blind randomised trial Widmer et al. | Obstetrics and Gynecology | 5/22/2010  LANCET | Hemorrhage is the leading cause of maternal mortality in low-resource settings.7 Misoprostol is a prostaglandin E1 analogue that is widely marketed for the prevention and treatment of peptic ulcer disease. Although misoprostol is less effective than oxytocin for prevention of post-partum hemorrhage, it has been promoted widely because it is thermostable, orally administered, and inexpensitve.8 A trial on misoprostol administration in rural India found misoprostol is more effective than placebo in decreasing rates of post-partum hemorrhage, further supporting its use.9 This study randomized 1422 women with postpartum hemorrhage? to receive either 600 μg misoprostol (n=705) or matching placebo (n=717) sublingually. Both groups were also given routine injectable uterotonics. They found that the proportion of women in the misoprostol group who lost 500 mL of blood or more within 60 minutes was similar to the placebo group (100[14%] vs 100[14%], relative risk 1.02 [95% CI 0.79 – 1.32]). This is a reversal of the use of misoprostol as an adjunct to uterotonics for the treatment of post-partum hemorrhage. | 2014. Cochrane review. “Four RCTs (1881 participants) compared misoprostol with placebo given in addition to conventional uterotonics. Adjunctive use of misoprostol (in the dose of 600 to 1000 mcg) with simultaneous administration of additional uterotonics did not provide additional benefit for our primary outcomes including maternal mortality (risk ratio (RR) 6.16, 95% confidence interval (CI) 0.75 to 50.85), serious maternal morbidity (RR 0.34, 95% CI 0.01 to 8.31), admission to intensive care (RR 0.79, 95% CI 0.30 to 2.11) or hysterectomy (RR 0.93, 95% CI 0.16 to 5.41).  10 | pubMed suggestion |
| 61 | Effect of vitamin A supplementation in women of reproductive age on maternal survival in Ghana (ObaapaVitA): a cluster-randomised, placebo-controlled trial Kirkwood et al | Obstetrics and Gynecology | 5/8/2010  LANCET | Vitamin A deficiency is a well-recognized nutritional problem and the leading cause of preventable childhood blindness. Vitamin A supplementation is safe (including during pregnancy), inexpensive, and potentially deliverable at community level, even in the absence of strong health systems advocated in existing safe motherhood strategies.11 This study randomized subjects in Ghana to receive a vitamin A supplements (25000 IU retinol equivalents) (544 clusters of 104 484 women) or placebo (542 clusters of 103 297 women). They found that women supplemented with vitamin A did not have significantly lower rates of pregnancy-related deaths than the placebo group (348 deaths per 100 000 pregnancies vs 377 per 100 000 pregnancies, adjusted odds ratio; 0.92 [95% CI 0.73-1.18], p=0.51). This is a reversal of vitamin A supplementation for reduction of pregnancy-related deaths in African countries. | 2015. Cochrane review. “The pooled results of three large trials in Nepal, Ghana and Bangladesh (with over 153,500 women) do not currently suggest a role for antenatal vitamin A supplementation to reduce maternal or perinatal mortality”12 | PubMed suggestion |
| 62 | Carotid artery stenting compared with endarterectomy in patients with symptomatic carotid stenosis (International Carotid Stenting Study): an interim analysis of a randomised controlled trial  Ederle et al. | Cardiovascular Disease | 3/20/2010  LANCET | Stenting for carotid artery stenosis gained popularity during the 1990s, and by 1999 stenting was used in almost 85% of percutaneous coronary intervention procedures.13 The potential benefit of endovascular treatment (angioplasty with or without stenting) as an alternative to carotid endarterectomy was first highlighted by the Carotid and Vertebral Artery Transluminal Angioplasty Study (CAVATAS).14 Two large randomized trials comparing use of carotid stenting with endarterectomy for symptomatic stenosis have subsequently published short-term outcomes and longer term results.15 This multicenter, international study randomized 1713 subjects with recent symptomatic carotid artery stenosis to receive either carotid artery stenting (n=855) or carotid endarterectomy (n=858). They found the stenting group had significantly higher incidence of stroke, death or procedural myocardial infarction (8.5% vs 5.2%, HR 1.69 [95% CI 1.16 – 2.45 p = 0.006]), risk of any stroke (HR 1.92 [1.27 – 2.89]), and all-cause death (HR 2.76 [1.16 – 6.56]). This is a reversal of the use of carotid artery stenting in patients with symptomatic carotid artery stenosis over carotid endarterectomy. | 2012. Cochrane review. “Endovascular treatment is associated with an increased risk of peri-procedural stroke or death compared with endarterectomy. However, this excess risk appears to be limited to older patients. The longer term efficacy of endovascular treatment and the risk of restenosis are unclear and require further follow-up of existing trials.”16  2017. Journal of American college of Cardiology “CAS [carotid artery stenting] and CEA [carotid artery endarterectomy] were associated with similar rates of a composite of periprocedural death, stroke, MI, or nonperiprocedural ipsilateral stroke. The risk of long-term overall stroke was significantly higher with CAS, and was mostly attributed to periprocedural minor stroke. CAS was associated with lower rates of periprocedural MI and cranial nerve palsy than CEA.”17 | PubMed suggestion |
| 63 | Comparative effectiveness of MRI in breast cancer (COMICE) trial: a randomised controlled trial  Turnbill et al. | Oncology | 2/13/2010  LANCET | Malignant lesions are difficult to detect in the mammographically dense breast. There is good evidence that MRIs detect malignancies, and may be better than X-ray mammography. Findings from two observational studies18 on the role of dynamic contrast-enhanced MRI in clinical management of patients scheduled for breast-conservation surgery have shown management to be altered in 14–18% of patients because of detection of disease that was more extensive than was first diagnosed, although neither study reported factors predictive of alteration in outcome. The COMICE study randomized 1623 women aged 18 years or older with biopsy-proven primary breast cancer who were scheduled for wide local excision after clinical, radiological (X-ray mammography and ultrasound), and pathological (fine-needle aspiration cytology or core biopsy) assessment. Patients were assigned to either MRI (n=816) or no further imaging (n=807). They found that addition of MRI to conventional triple assessment was not associated with a reduction of reoperation rate, with 153 (19%) needing reoperation in the MRI group and 156 (19%) in the no MRI group (Odds ratio 0.96 [95% CI 0.75-1.24], p=0.77). This is a reversal of the use of MRI after triple assessment in women with breast cancer. | 2013. “Our summary of the evidence showed that MRI significantly increased mastectomy rates and suggests an unfavorable harm-benefit ratio for routine use of preoperative MRI in BC. We found weak evidence that MRI reduced re-excision surgery in patients with [Invasive lobular cancer] ILC -although this was at the expense of increased mastectomies-and overall patient benefit from MRI in ILC is not clear from this study.”19 | PubMed suggestion |
| 64 | Umbilical vein oxytocin for the treatment of retained placenta (Release Study): a double-blind, randomised controlled trial Weeks et al. | Obstetrics and Gynecology | 1/9/2010  LANCET | Retained placenta complicates 0.1 – 2% of deliveries. The rate has increased in Europe since the 1920’s, and is nearly ten times that of resource-poor settings. Oxytocin injection into the umbilical cord began as early as the 1980s to treat retained placenta20 an alternative to manual removal, which is invasive and carries risk of infection and trauma.21 This study randomizes 577 hemodynamically stable women with a retained placenta for more than 30 minutes to receive 30 mL saline containing either 50 IU oxytocin (n=292) or 5 mL water (n=285). This study found that umbilical oxytocin has no clinically significant effect on the need for manual removal for women with retained placenta (oxytocin 179/292 [61.3%] vs placebo 177/285 [62.1%]). This is a reversal of the use of umbilical vein oxytocin for treatment of retained placenta on hemodynamically stable women. | 2012. Cochrane review. “… high-quality randomized trials show that the use of oxytocin has little or no effects [on reduction in manual removal of the placenta].”22 | PubMed suggestion |
| 65 | Chlorhexidine maternal  vaginal and neonate body wipes in sepsis and vertical  transmission of pathogenic  bacteria in South Africa: a  randomised, controlled trial Cutland et al. | Obstetrics and Gynecology | 12/5/2009  LANCET | Chlorhexidine wipes have been developed to help prevent the spread of bacterial infections from mother to newborn baby. Some countries in Europe have already implemented the practice of vaginal disinfection with these wipes as preventive measures.23 Neonatal and maternal mortality and morbidity due to bacterial infections are high in places like Africa, and some countries, like Malawi, have tested this type of intervention.24 In this study 8011 women aged 12-51 years were randomly assigned to chlorhexidine vaginal wipes (n=4072) or external genitalia water wipes (4057) during active labor. They showed that there was no difference between chlorhexidine and control groups in preventing neonatal sepsis or vertical acquisition of potentially pathogenic bacteria (chlorhexidine 141 [3%] of 4072 *vs* control 148 [4%] of 4057; p=0.6518). This is a reversal of the practice of using chlorhexidine vaginal wipes to reduce neonatal sepsis and vertical acquisition of potentially pathogenic bacteria in neonates. | 2015. Cochrane review. “Maternal vaginal chlorhexidine compared to usual care probably leads to no difference in neonatal mortality in hospital settings. Maternal vaginal chlorhexidine compared to usual care results in no difference in the risk of infections in hospital settings.”25 | PubMed suggestion |
| 66 | Comparison of routine and on-demand prescription of chest radiographs in mechanically ventilated adults: a multicentre, cluster-randomised, two-period crossover study Hejblum et al. | Critical Care Medicine | 11/14/2009  LANCET | The American College of Radiology recommends routine chest radiographs for patients who are mechanically ventilated, in part because this can help diagnose life-threatening situations.26 However, because of the extra radiation and often unnecessary expense, the practice of routine chest radiographs is questioned.26 A survey of physicians showed that 63% of physicians used a daily-routine strategy for chest radiographs.27 This RCT randomly assigned 21 ICUs at 18 hospitals in France to use a routine (n=424) or on demand (n=425) strategy. They showed that an on-demand strategy reduced the number of chest radiographs(32% [95% CI 25 – 38]) without significant differences in mortality, length of hospital stay, or days of mechanical ventilation compared to routine daily chest radiographs. This is a reversal of the routine daily use of chest radiographs in mechanically ventilated patients. | 2012. “This meta-analysis did not detect any harm associated with a restrictive chest radiograph strategy.”28 Not all studies included in the review were randomized. | PubMed suggestion |
| 67 | Effect of interferon gamma-1b on survival in patients with idiopathic pulmonary fibrosis (INSPIRE): a multicentre, randomised, placebo-controlled trial King et al | Pulmonary Disease | 7/18/2009 | Idiopathic pulmonary fibrosis (IPF) is a disease where there is fibroblast proliferation and excess extracellular connective tissue matrix protein, which leads to deterioration of lung function.29 Treatment options are poor, as the few that are recommended show little to moderate benefit. Interferon gamma-1b has been shown to reduce fibroblast proliferation and extracellular matrix deposition, and these findings led to the thought that it might also be an effective treatment option for patients with IPF.29 These findings, combined with poor treatment options led to the use of interferon gamma1-b before randomized trials could be conducted to test the effectiveness. | 2010. Cochrane review. “From the studies in this review, interferon gamma‐1beta has not been shown to affect survival.” |  |
| 68 | Effectiveness of thigh-length graduated compression stockings to reduce the risk of deep vein thrombosis after stroke (CLOTS trial 1): a multicentre, randomised controlled trial CLOTS Trials Collaboration, Dennis et al. | Cardiovascular Disease | 6/9/2009  LANCET | Compression therapy was first used by German physicians in the late 19th century when they noticed that superficial vein thromboses disappeared after the use of compression bandages.30 Compression stockings were used as early as the 1930s but became widely used after the results of a trial were published in 2000.30 National stroke guidelines recommend use of graduated compression stockings (GCS) to reduce risk of deep vein thrombosis (DVT) and pulmonary embolism31 although there is a lack of clinical trials investigating its use in an acute stroke population. This study compared routine care plus GCS (n=1265) with routine care plus avoidance of GCS (n=1262) in patients within 1 week of an acute stroke. The study found that there was no difference in occurrence of symptomatic or asymptomatic DVT between groups (126 [10%] in the GCS group vs 133 [10.5%] in the control group) and more adverse events (64 [5%] vs 16 [1%]) in the GCS group. This is a reversal of the use of thigh-length graduated compression stockings to reduce the risk of deep vein thrombosis after stroke. | Cochrane. 2010. “Evidence from randomised trials does not support the routine use of GCS to reduce the risk of DVT after acute stroke.”32 However, this RCT was not included in the review. | PubMed suggestion |
| 69 | Warfarin thromboprophylaxis in cancer patients with central venous catheters (WARP): an open-label randomised trial Young et al. | Oncology | 2/14/2009  LANCET | The use of long-term central venous catheters (CVC) for infusional chemotherapy is common in patients with cancer. However, their use has been associated with upper-limb deep-vein thrombosis (DVT). Earlier clinical trials found that patients treated with CVC chemotherapy benefited from prophylactic anticoagulation, but later trials have shown contradictory findings.33 A majority of clinicians in the UK have been found to administer warfarin for thromboprophylaxis in their patients receiving CVC chemotherapy, even with the uncertainty of its efficacy.34 35 This study compared the effect of warfarin (n=408) vs no warfarin (n=404) on rate of radiologically proven, symptomatic catheter-related thrombosis and found no significant difference in symptomatic catheter-related or other thromboses in patients with cancer. Compared with no warfarin, warfarin did not reduce the rate of catheter related thromboses (24 [6%] vs 24 [6%], relative risk 0.99, [95% CI 0.57 – 1.72], p=0.98). This is a reversal of the use of warfarin to reduce catheter related thromboses. | 2014. Cochrane review. “Compared with no anticoagulation, we found a statistically significant reduction of symptomatic DVT with heparin and asymptomatic DVT with VKA. Heparin was associated with a higher risk of thrombocytopenia and asymptomatic DVT when compared with VKA. However, the findings did not rule out other clinically important benefits and harms. People with cancer with CVCs considering anticoagulation should balance the possible benefit of reduced thromboembolic complications with the possible harms and burden of anticoagulants.”36 | pubMed suggestion |
| 70 | Efficacy of systematic pelvic lymphadenectomy in endometrial cancer (MRC ASTEC trial): a randomised study  Kitchener et al. | Oncology | 1/10/2009  LANCET | Endometrial cancer is a common gynecological cancer that is generally treated through hysterectomy and bilateral salpingo-oophorectomy (BSO) for stage I tumors. Some patients with stage 1 endometrial cancer are still at risk of metastasis after surgery, and adjuvant radiotherapy is typically added to treatment in high risk women.37 To prevent unnecessary adjuvant radiotherapy, guidelines have implemented systemic pelvic and para-aortic lymphadenectomy to properly stage the endometrial cancer.38 Case series and non-randomized studies have shown an association between lymphadenectomy and increased survival,39 40 but other observational studies have not found benefit to the procedure.41 From 85 centers in four countries, 1408 women with histologically proven endometrial carcinoma thought preoperatively to be confined to the corpus were randomized to either standard surgery (n=704) or standard surgery plus lymphadenectomy (n=704). This study found that the addition of lymphadenectomy to standard therapy did not affect overall or recurrence-free survival in women with early endometrial cancer (88 deaths in the standard surgery group vs 103 in lymphadenectomy, HR: 1.16 [95% CI: 0.87 – 1.54; p = 0.31]). This is a reversal of the guidelines recommending lymphadenectomy to properly stage endometrial cancer. | 2017. Cochrane review. “This review found no evidence that lymphadenectomy decreases risk of death or disease recurrence compared with no lymphadenectomy in women with presumed stage I disease.”42 | pubMed suggestion |
| 71 | Cardiovascular events associated with rofecoxib: final analysis of the APPROVe trial Baron et al. | Cardiovascular Disease | 11/15/2008  LANCET | Rofecoxib was approved by the FDA in 1999 to treat osteoarthritis, acute pain, and dysmenorrhea.43 Because of the anti-inflammatory effect, rofecoxib was also thought to prevent colorectal polyps and cancer. By 2004, 80 million patients had taken this drug, and annual sales were more than $2.5 billion.43 The APPROVe study randomized 2587 patients with a history of colorectal adenomas to either 25 mg rofecoxib (n=1287) or placebo (n=1300). They assessed the effects of rofecoxib on recurrence of adenomatous polyps in the large bowel and found that rofecoxib was associated with an increased combined incidence of non-fatal myocardial infarction, non-fatal stroke, and death from cardiovascular, hemorrhagic, and unknown causes (59 vs 34; hazard ratio 1.79 [95% CI 1.17 – 2.73], p=0.006). The trial was terminated early on recommendation of its data safety and monitoring board due to concerns about cardiovascular toxicity. This is a reversal of the use of rofecoxib to prevent colorectal polyps and cancer due to harms. | 2011. “Compared with placebo, rofecoxib was associated with the highest risk of myocardial infarction.”44 | GoogleScholar - cited this RCT |
| 72 | Effect of rosuvastatin in patients with chronic heart failure (the GISSI-HF trial): a randomised, double-blind, placebo-controlled trial Tavazzi et al. | Cardiovascular Disease | 10/4/2008  LANCET | Statins are known to be effective for atherothrombosis prevention, but are also under investigation for other indications such as their potential anti-inflammatory, antihypertrophic, antifibrotic, and antioxidant effects.45 Large observational studies and meta-analyses have indicated that statins can contribute to lowered cardiovascular mortality.45 Patients aged 18 years or older with chronic heart failure of New York Association class II-IV, irrespective of cause and left ventricular ejection fraction were randomized to rosuvastatin (10 mg daily, n=2285) or placebo (n=2289). This study found that rosuvastatin had no effect on time to death or admission to hospital for cardiovascular reasons (1305 [57%]) compared to placebo (1283 [56%]; adjusted HR 1.01 [99% CI 0.908 – 1.112], p=0.903). This is a reversal of the use of statins for lowered cardiovascular mortality in patients with chronic heart failure. | 2010. National Clinical Guideline for Diagnosis and Management in Primary and Secondary Care. “These trials (GISSI-HF and CORONA) randomized 4574 patients with heart failure and 5011 patients over the age of 60 years with systolic heart failure of ischaemic origin, respectively, to have 10 mg rosuvastatin or placebo. The statin did not have an impact on any of the trials’ outcomes other than reducing hospitalisation in the CORONA study. Therefore, it is unlikely that statins would be beneficial in heart failure. The Guideline Development Group (GDG) felt that in the light of this evidence, the recommendation on statin use from the 2003 guideline should be deleted.” | PubMed suggestion |
| 73 | Management of asthma based on exhaled nitric oxide in addition to guideline-based treatment for inner-city adolescents and young adults: a randomised controlled trial Szefler et al. | Pulmonary Disease | 9/20/2008  LANCET | International guidelines recommend a range of clinical tests to confirm the diagnosis and manage symptoms of asthma. Included in this is exhaled nitric oxide.46 This study randomized 546 patients who adhered to treatment during this run-in period were then randomly assigned to 46 weeks of either standard treatment, based on guidelines of the National Asthma Education and Prevention Program, or standard treatment modified on the basis of measurements of fraction of exhaled NO. They found that conventional asthma management resulted in good control of symptoms, while the addition of exhaled nitric oxide resulted in higher doses of inhaled corticosteroids without any clinically important improvements in asthma symptoms or management (difference in mean number of days with asthma symptoms between groups; 0.04 [95% CI -0.22 to 0.29], p=0.78) in patients with persistent asthma. This is a reversal of the universal management of asthma based on exhaled nitric oxide. | 2016. Cochrane review. “Therefore, the use of FeNO to guide asthma therapy in children may be beneficial in a subset of children (had at least one exacerbation during the study period), it cannot be universally recommended for all children with asthma.”47 | PubMed suggestion |
| 74 | Active symptom control with or without chemotherapy in the treatment of patients with malignant pleural mesothelioma (MS01): a multicentre randomised trial Muers et al. | Oncology | 5/17/2008  LANCET | Treatment recommendations for malignant mesothelioma have been primarily through active symptom control (ASC)48 and because chemotherapy therapies do not appear to provide benefit for patients with mesothelioma. Despite this, chemotherapy has been used,49 although no specific regimen appears to be more favorable than others. 409 patients with malignant pleural mesothelioma were randomly assigned to ASC alone (n=136), to ASC plus MVP (four cycles of mitomycin 6 mg/m2, vinblastine 6 mg/m2, and cisplatin 50 mg/m2 every 3 weeks, n=137), of ASC plus vinorelbine (one injection of vinorelbine 30 mg/m2 every week for 12 weeks, n=136). This study found that the addition of chemotherapy to ACS did not increase overall survival (393 [96%] deaths overall, ASC 132 [97%], ASC plus MVP 132 [96%], ASC plus vinorelbine 129 [95%]) or quality of life compared to ACS alone in patients with malignant pleural mesothelioma. This is a reversal of the addition of chemotherapy, specifically MVP and vinblastine, to ASC in patients with MS01. Since the publication of this trial, there have been positive RCTs on this condition. This is a reversal of the practice at the time of this study. | None found | active symptom control chemotherapy in malignant pleural mesothelioma |
| 75 | Multiple-dose activated charcoal in acute self-poisoning: a randomised controlled trial Eddleston et al. | Public Health and General Preventive Medicine | 2/16/2008  LANCET | In rural developing countries, self-poisoning is often a result of ingesting toxic pesticides and plants rather than pharmaceuticals that are more often used in the developed world. Activated charcoal is a widely used substance to treat self-poisoning in some parts of the world.50 4632 patients were randomized to receive no charcoal (n=1554), one dose of charcoal (n=1545), or six doses of charcoal (n=1533). This study found that activated charcoal did not reduce risk of mortality (97 [6.3%]) compared to no charcoal (105 [6.8%]) in patients experiencing self-poisoning in 3 Sri Lankan hospitals. This is a reversal of the use of activated charcoal in cases of self-poisoning in developing countries. | None found | activated charcoal and poisoning |
| 76 | Risperidone, haloperidol, and placebo in the treatment of aggressive challenging behaviour in patients with intellectual disability: a randomised controlled trial Tyrer et al. | Psychiatry | 1/5/2008  LANCET | Adults with intellectual disability can often times express aggressive, challenging behavior. Antipsychotic drugs are often used in this population, even if the patient with intellectual disability does not have any underlying psychiatric illness.51 The NACHBID study randomized 86 non-psychotic patients presenting with aggressive challenging behavior from ten centers in England, Wales, and one in Australia to either haloperidol (n=28), risperidone (n=29) or placebo (n=29). They found that haloperidol, risperidone, and placebo all decreased aggression after 4 weeks in non-psychotic patients presenting with aggressive behavior, with placebo showing the greatest change (median decrease in MOAS score after 4 weeks=9 [95% CI 5–14] for placebo, 79% from baseline; 7 [4–14] for risperidone, 58% from baseline; 6.5 [5–14] for haloperidol, 65% from baseline; p=0·06). This is a reversal of the administration of risperidone or haloperidol to patients with intellectual disabilities expressing aggressive challenging behavior who did not have any underlying psychiatric illness. | A 2016 review concluded that there was insufficient evidence to support the use of psychotherapy, biological, or system level interventions for adults with mild to moderate intellectual disabilities. This review did not include the RCT in the in its analysis.52 | GoogleScholar-cited RCT |
| 77 | Mechanical bowel preparation for elective colorectal surgery: a multicentre randomised trial Contant et al. | Surgery | 12/22/2007  LANCET | Preoperative bowel preparation has been used since the 1950s to reduce intestinal mass, decrease risk of infection from pathogens in the colon, and improve post-surgical healing.53 This procedure was commonly used at the beginning of this study.53 1431 patients who were going to have elective colorectal surgery were randomly assigned to either mechanical bowel preparation (n=670) or not (n=684). This study found that mechanical bowel preparation did not lower the rate of anastomotic leakage compared to no preparation (difference 0.6%, 95% CI −1.7% to 2.9%, p=0.69). This is a reversal of the use of mechanical bowel preparation for elective colorectal surgery. | 2011. Cochrane review. “Despite the inclusion of more studies with a total of 5805 participants, there is no statistically significant evidence that patients benefit from mechanical bowel preparation, nor the use of rectal enemas. In colonic surgery the bowel cleansing can be safely omitted and induces no lower complication rate.”54 | PubMed suggestion |
| 78 | Assessment of diclofenac or spinal manipulative therapy, or both, in addition to recommended first-line treatment for acute low back pain: a randomised controlled trial Hancook et al. | Orthopedic | 11/10/2007  LANCET | Current guidelines for first line treatment for acute lower back pain recommend physicians give advice (remain active, avoid bed rest, and reassurance of favorable prognosis) and paracetamol. Non-steroidal anti-inflammatory drugs (NSAIDs) and spinal manipulative therapy are recommended as second-line management options for patients who have slow recovery.55 240 patients with acute low back pain who had seen their general practitioner and had been given advice and paracetamol were randomized to one of four groups: diclofenac 50 mg twice daily and placebo manipulative therapy (n=60); diclofenac 50 mg twice daily and spinal manipulative therapy (n=60); spinal manipulative therapy and placebo drug (n=60); or double placebo (n=60). This study found that patients do not recover more quickly with the addition of either diclofenac or spinal manipulative therapy (spinal manipulative therapy hazard ratio 1.01, [95% CI 0.77–1.31], p=0.955). This is a double reversal of the use of spinal manipulative therapy and diclofenac for treatment of acute lower back pain. | A 2017 SR/MA found spinal manipulation to be beneficial for patients with acute low back pain, but not when comparing spinal manipulation to sham controls.56 |  |
| 79 | Effect of daily zinc supplementation on child mortality in southern Nepal: a community-based, cluster randomised, placebo-controlled trial Tielsch et al. | Public Health and General Preventive Medicine | 10/6/2007  LANCET | Zinc is a micronutrient that may lower the risk of morbidity and mortality when provided to populations that are deficient. Several methods have been used to increase the availability and intake of zinc in these populations, including supplementation and fortification.57 A community based, cluster-randomized trial randomized 41276 children aged 1-35 months into a zinc group (n=20968) or placebo (n=20308). They found no reduction in mortality between the two groups (Hazard ratio 0.92 [95% CI 0.75 – 1.12]). This is a reversal of the supplementation the individual nutrient of zinc in developing countries to reduce mortality. | 2014. Cochrane.  This review found that there was a non-significant reduction in risk of death with zinc supplementation (RR 0.95 [95% CI 0.86 – 10.5]), and a small increase in average height in the zinc group. They concede that a “size of this effect might not be clinically important”, however.58 | PubMed suggestion |
| 80 | Effectiveness of an early supplementation scheme of high-dose vitamin A versus standard WHO protocol in Gambian mothers and infants: a randomised controlled trial Darboe et al. | Public Health and General Preventive Medicine | 6/23/2007  LANCET | Many developing countries have adopted the WHO recommended dose for vitamin A supplementation.59 The Vitamin A Consultative Group recommended a doubling of vitamin A recommendations for developing countries, out of concern for low serum concentrations of retinol in populations living in these countries. 60 197 infants were randomized to either high dose (n=99) or the WHO recommended dose (n=98) and followed for 12 months. This study determined that a high-dose regimen of vitamin A supplementation for mother-infant pairs in rural Gambia did not affect levels of infant plasma vitamin A, and rates of H pylori infection, pneumococcal carriage, and gut epithelial integrity compared to the WHO recommended dose. This is a reversal of vitamin A supplementation at levels recommended by the Vitamin A Consultative Group, which are higher than World Health Organization, in developing countries. | 2016. Cochrane review. “There was no evidence of benefit from different doses of vitamin A supplementation for postpartum women on maternal and infant mortality and morbidity, compared with other doses or placebo.”61 | PubMed suggestion |
| 81 | Effect of zinc supplementation on mortality in children aged 1–48 months: a community-based randomised placebo-controlled trial Sazawal  et al. | Public Health and General Preventive Medicine | 3/17/2007  LANCET | Zinc is a micronutrient that may lower the risk of morbidity and mortality when provided to populations that are deficient, and cross-sectional studies have shown an inverse association between zinc status and certain types of malaria.62 Several methods have been used to increase the availability and intake of zinc in these populations, including supplementation and fortification.57 This study compared daily supplementation with zinc (10 mg, 5 mg in children younger than 12 months; n=21274) compared to placebo (n=21272) in children aged 1-36 months residing in an area with a high-frequency of malaria. They found no significant reduction in overall mortality (7% difference [95% CI -6% - 19%], p=0.29) between the group supplemented with zinc and placebo. This is a reversal of zinc supplementation in areas with high incidence of malaria to reduce mortality. | 2014. Cochrane.  This review found that there was a non-significant reduction in risk of death with zinc supplementation (RR 0.95 [95% CI 0.86 – 10.5]), and a small increase in average height in the zinc group. They concede that a “size of this effect might not be clinically important”, however.58 | PubMed suggestion |

1. Pepin K, del Carmen M, Brown A, et al. CA 125 and epithelial ovarian cancer: role in screening, diagnosis, and surveillance. *American Journal of Hematology/Oncology®* 2014;10(6)

2. Kew F, Galaal K, Bryant A, et al. Evaluation of follow-up strategies for patients with epithelial ovarian cancer following completion of primary treatment. *Cochrane Database Syst Rev* 2011;6

3. Higginson IJ, Hart S, Silber E, et al. Symptom prevalence and severity in people severely affected by multiple sclerosis. *Journal of palliative care* 2006;22(3):158.

4. Saleem T, Leigh PN, Higginson IJ. Symptom prevalence among people affected by advanced and progressive neurological conditions-a systematic review. *Journal of palliative care* 2007;23(4):291.

5. Wilt TJ, Niewoehner D, MacDonald R, et al. Management of stable chronic obstructive pulmonary disease: a systematic review for a clinical practice guideline. *Annals of internal medicine* 2007;147(9):639-53.

6. Ekström M, Ahmadi Z, Bornefalk‐Hermansson A, et al. Oxygen for breathlessness in patients with chronic obstructive pulmonary disease who do not qualify for home oxygen therapy. *The Cochrane Library* 2016

7. Khan KS, Wojdyla D, Say L, et al. WHO analysis of causes of maternal death: a systematic review. *Lancet* 2006;367(9516):1066-74. doi: 10.1016/s0140-6736(06)68397-9 [published Online First: 2006/04/04]

8. Prata N, Sreenivas A, Vahidnia F, et al. Saving maternal lives in resource-poor settings: facing reality. *Health policy* 2009;89(2):131-48.

9. Derman RJ, Kodkany BS, Goudar SS, et al. Oral misoprostol in preventing postpartum haemorrhage in resource-poor communities: a randomised controlled trial. *The Lancet* 2006;368(9543):1248-53. doi: <https://doi.org/10.1016/S0140-6736(06)69522-6>

10. Mousa HA, Alfirevic Z. Treatment for primary postpartum haemorrhage. *Cochrane database syst Rev* 2003;1

11. Starrs AM. Delivering for women. *The Lancet* 2007;370(9595):1285-87.

12. Van Den Broek N, Dou L, Othman M, et al. Vitamin A supplementation during pregnancy for maternal and newborn outcomes. *Cochrane Database of Systematic Reviews* 2010(11)

13. Newsome LT, Kutcher MA, Gandhi SK, et al. A protocol for the perioperative management of patients with intracoronary drug-eluting stents. *Anesthesia Patient Safety Foundation APSF Newsletter* 2006;4:81-2.

14. Brown M, Rogers J, Bland J. Endovascular versus surgical treatment in patients with carotid stenosis in the Carotid and Vertebral Artery Transluminal Angioplasty Study (CAVATAS): a randomised trial. *The Lancet* 2001;357(9270):1729-37.

15. Mas J-L, Chatellier G, Beyssen B, et al. Endarterectomy versus stenting in patients with symptomatic severe carotid stenosis. *New England Journal of Medicine* 2006;355(16):1660-71.

16. Bonati LH, Lyrer P, Ederle J, et al. Percutaneous transluminal balloon angioplasty and stenting for carotid artery stenosis. *The Cochrane Library* 2012

17. Sardar P, Chatterjee S, Aronow HD, et al. Carotid artery stenting versus endarterectomy for stroke prevention: a meta-analysis of clinical trials. *Journal of the American College of Cardiology* 2017;69(18):2266-75.

18. Fischer U, Kopka L, Grabbe E. Breast carcinoma: effect of preoperative contrast-enhanced MR imaging on the therapeutic approach. *Radiology* 1999;213(3):881-88.

19. Houssami N, Turner R, Morrow M. Preoperative magnetic resonance imaging in breast cancer: meta-analysis of surgical outcomes. *Annals of surgery* 2013;257(2):249-55.

20. Carroli G, Bergel E. Umbilical vein injection for management of retained placenta. *Cochrane Database of Systematic Reviews* 2001(4) doi: 10.1002/14651858.CD001337

21. Sivalingam N, Surinder S. Is there a place for intra-umbilical oxytocin for the management of retained placenta? *The Medical journal of Malaysia* 2001;56(4):451-9. [published Online First: 2002/05/17]

22. Nardin JM, Weeks A, Carroli G. Umbilical vein injection for management of retained placenta. *The Cochrane Library* 2011

23. Schrag SJ, Schuchat A. Easing the burden: characterizing the disease burden of neonatal group B streptococcal disease to motivate prevention: The University of Chicago Press, 2004.

24. Taha TE, Biggar RJ, Broadhead RL, et al. Effect of cleansing the birth canal with antiseptic solution on maternal and newborn morbidity and mortality in Malawi: clinical trial. *Bmj* 1997;315(7102):216-20.

25. Sinha A, Sazawal S, Pradhan A, et al. Chlorhexidine skin or cord care for prevention of mortality and infections in neonates. *The Cochrane Library* 2015

26. Hejblum G, Chalumeau-Lemoine L, Ioos V, et al. Comparison of routine and on-demand prescription of chest radiographs in mechanically ventilated adults: a multicentre, cluster-randomised, two-period crossover study. *The Lancet* 2009;374(9702):1687-93.

27. Graat ME, Hendrikse KA, Spronk PE, et al. Chest radiography practice in critically ill patients: a postal survey in the Netherlands. *BMC medical imaging* 2006;6(1):8.

28. Ganapathy A, Adhikari NK, Spiegelman J, et al. Routine chest x-rays in intensive care units: a systematic review and meta-analysis. *Critical Care* 2012;16(2):R68.

29. Interferon gamma-1b therapy for advanced idiopathic pulmonary fibrosis. Mayo Clinic proceedings; 2003. Elsevier.

30. Galanaud JP, Laroche JP, Righini M. The history and historical treatments of deep vein thrombosis. *Journal of Thrombosis and Haemostasis* 2013;11(3):402-11.

31. Adams HP, Jr., del Zoppo G, Alberts MJ, et al. Guidelines for the early management of adults with ischemic stroke: a guideline from the American Heart Association/American Stroke Association Stroke Council, Clinical Cardiology Council, Cardiovascular Radiology and Intervention Council, and the Atherosclerotic Peripheral Vascular Disease and Quality of Care Outcomes in Research Interdisciplinary Working Groups: The American Academy of Neurology affirms the value of this guideline as an educational tool for neurologists. *Circulation* 2007;115(20):e478-534. doi: 10.1161/circulationaha.107.181486 [published Online First: 2007/05/23]

32. Naccarato M, Chiodo Grandi F, Dennis M, et al. Physical methods for preventing deep vein thrombosis in stroke. *Cochrane Database Syst Rev* 2010(8):Cd001922. doi: 10.1002/14651858.CD001922.pub3 [published Online First: 2010/08/06]

33. Couban S, Goodyear M, Burnell M, et al. Randomized placebo-controlled study of low-dose warfarin for the prevention of central venous catheter-associated thrombosis in patients with cancer. *Journal of clinical oncology : official journal of the American Society of Clinical Oncology* 2005;23(18):4063-9. doi: 10.1200/jco.2005.10.192 [published Online First: 2005/03/16]

34. Monreal M, Alastrue A, Rull M, et al. Upper extremity deep venous thrombosis in cancer patients with venous access devices--prophylaxis with a low molecular weight heparin (Fragmin). *Thrombosis and haemostasis* 1996;75(2):251-53.

35. Bern MM, Lokich JJ, Wallach SR, et al. Very low doses of warfarin can prevent thrombosis in central venous catheters: a randomized prospective trial. *Annals of internal medicine* 1990;112(6):423-28.

36. Akl EA, Ramly EP, Kahale LA, et al. Anticoagulation for people with cancer and central venous catheters. *The Cochrane Library* 2014

37. Kong A, Simera I, Collingwood M, et al. Adjuvant radiotherapy for stage I endometrial cancer: systematic review and meta-analysis. *Annals of Oncology* 2007;18(10):1595-604. doi: 10.1093/annonc/mdm066

38. Shepherd JH. Revised FIGO staging for gynaecological cancer. *BJOG: An International Journal of Obstetrics & Gynaecology* 1989;96(8):889-92.

39. Creasman WT, Morrow CP, Bundy BN, et al. Surgical pathologic spread patterns of endometrial cancer: A gynecologic oncology group study. *Cancer* 1987;60(S8):2035-41. doi: doi:10.1002/1097-0142(19901015)60:8+<2035::AID-CNCR2820601515>3.0.CO;2-8

40. Morrow CP, Bundy BN, Kurman RJ, et al. Relationship between surgical-pathological risk factors and outcome in clinical stage I and II carcinoma of the endometrium: a Gynecologic Oncology Group study. *Gynecol Oncol* 1991;40(1):55-65. [published Online First: 1991/01/01]

41. Trimble EL, Kosary C, Park RC. Lymph node sampling and survival in endometrial cancer. *Gynecol Oncol* 1998;71(3):340-3. doi: 10.1006/gyno.1998.5254 [published Online First: 1999/01/15]

42. Frost JA, Webster KE, Bryant A, et al. Lymphadenectomy for the management of endometrial cancer. *Cochrane Database Syst Rev* 2017;10:Cd007585. doi: 10.1002/14651858.CD007585.pub4 [published Online First: 2017/10/03]

43. Topol EJ. Failing the public health—rofecoxib, Merck, and the FDA. *New England Journal of Medicine* 2004;351(17):1707-09.

44. Trelle S, Reichenbach S, Wandel S, et al. Cardiovascular safety of non-steroidal anti-inflammatory drugs: network meta-analysis. *Bmj* 2011;342:c7086.

45. Levy WC. Observational studies of statins in systolic heart failure. *Heart failure clinics* 2008;4(2):201-08.

46. Global initiative for asthma: global strategy for asthma management and prevention. NHLBI/WHO workshop report NIH publication; 1995.

47. Petsky HL, Kew KM, Kynaston JA, et al. Exhaled nitric oxide levels to guide treatment for children with asthma. *Cochrane Database of Systematic Reviews* 2015

48. Committee BTSSoC. Statement on malignant mesothelioma in the United Kingdom. *Thorax* 2001;56(4):250-65.

49. Fizazi K, Caliandro R, Soulie P, et al. Combination raltitrexed (Tomudex®)–oxaliplatin: a step forward in the struggle against mesothelioma? The Institut Gustave Roussy experience with chemotherapy and chemo-immunotherapy in mesothelioma. *European Journal of Cancer* 2000;36(12):1514-21.

50. Ardagh M, Flood D, Tait C. Limiting the use of gastrointestinal decontamination does not worsen the outcome from deliberate self-poisoning. *The New Zealand Medical Journal* 2001;114(1140):423-25.

51. Branford D. A study of the prescribing for people with learning disabilities living in the community and in National Health Service care. *Journal of Intellectual Disability Research* 1994;38(6):577-86.

52. Koslowski N, Klein K, Arnold K, et al. Effectiveness of interventions for adults with mild to moderate intellectual disabilities and mental health problems: systematic review and meta-analysis. *The British Journal of Psychiatry* 2016:bjp. bp. 114.162313.

53. Oliveira L, Wexner SD, Daniel N, et al. Mechanical bowel preparation for elective colorectal surgery. *Diseases of the colon & rectum* 1997;40(5):585-91.

54. Guenaga K, Matos D, Wille-Jorgensen P. Mechanical bowel preparation for elective colorectal surgery. *Cochrane Database Syst Rev* 2009;1(1)

55. van Tulder M, Becker A, Bekkering T, et al. Chapter 3. European guidelines for the management of acute nonspecific low back pain in primary care. *European spine journal : official publication of the European Spine Society, the European Spinal Deformity Society, and the European Section of the Cervical Spine Research Society* 2006;15 Suppl 2:S169-91. doi: 10.1007/s00586-006-1071-2 [published Online First: 2006/03/22]

56. Paige NM, Miake-Lye IM, Booth MS, et al. Association of Spinal Manipulative Therapy With Clinical Benefit and Harm for Acute Low Back Pain: Systematic Review and Meta-analysis. *Jama* 2017;317(14):1451-60. doi: 10.1001/jama.2017.3086 [published Online First: 2017/04/12]

57. Gibson RS, Ferguson EL. Nutrition intervention strategies to combat zinc deficiency in developing countries. *Nutrition Research Reviews* 1998;11(1):115-31.

58. Mayo‐Wilson E, Junior JA, Imdad A, et al. Zinc supplementation for preventing mortality, morbidity, and growth failure in children aged 6 months to 12 years of age. *The Cochrane Library* 2014

59. Force WUIT, Group IVAC, UNICEF., et al. Vitamin A supplements: a guide to their use in the treatment and prevention of vitamin A deficiency and xerophthalmia: World Health Organization 1997.

60. Sommer A, Davidson FR. Assessment and control of vitamin A deficiency: the Annecy Accords. *The Journal of nutrition* 2002;132(9):2845S-50S.

61. Oliveira JM, Allert R, East CE. Vitamin A supplementation for postpartum women. *The Cochrane Library* 2016

62. Shankar AH. Nutritional modulation of malaria morbidity and mortality. *The Journal of infectious diseases* 2000;182(Supplement_1):S37-S53.

| **#** | **Article and Author** | **Primary Medical Discipline** | **Date and Journal** | **Summary** | **Systematic Review** | **Systematic Review Search Terms** |
| --- | --- | --- | --- | --- | --- | --- |
| 243 | Video Laryngoscopy vs Direct Laryngoscopy on Successful First-Pass Orotracheal Intubation Among ICU Patients A Randomized Clinical Trial  Lascarrou et al. | Critical care | 2/7/2017  JAMA | Given the inherent risk - such as cardiac arrest - that comes with intubating patients, indirect video laryngoscopy (VL) was developed to assist with the intubation process and reduce morbidity and mortality.1 Several types of these devices were commercially available in 2014.2 However, in a randomized control study of 371 patients in the ICU, it was found that, compared to direct laryngoscopy (DL, n=185), VL (n=186) was not beneficial in improving first-pass intubation success rates (67.7% for VL vs 70.3% for direct; absolute difference, -2.5%; 95% CI, -11.9% to 6.95; P=.60). Furthermore, VL was associated with increased rates of severe life-threatening complications compared to DL (absolute difference, 6.7%; 95% CI, 1.8% to 11.6%; P=.01). This is a reversal of video laryngoscopy for first-pass orotracheal intubation in ICU patients. | 2017. “The VL technique did not increase the first-attempt success rate during EI [endotracheal intubation] in ICU patients compared with DL. These findings do not support routine use of VL in ICU patients.”3 | GoogleScholar _ cited RCT |
| 244 | Effect of 2 Years of Treatment With Sublingual Grass Pollen Immunotherapy on Nasal Response to Allergen Challenge at 3 Years Among Patients With Moderate to Severe Seasonal Allergic Rhinitis The GRASS Randomized Clinical Trial  Scadding et al. | Allergy and immunology | 2/14/2017  JAMA | Rhinitis due to allergens is highly prevalent, and various treatment approaches exist. One option for treatment has been the use of sublingual immunotherapy in the form of droplets or tablets to increase the patient's exposure to the allergen, thereby increasing tolerance and improving the patient's symptoms.4 This randomized controlled trial compared sublingual immunotherapy (n=30), subcutaneous immunotherapy (positive control, n=31), and placebo (n=31) and their effect in patients with moderate to severe seasonal allergic rhinitis after 2 years of treatment. At 3 year follow up, the between-group difference was -0.18 (95% CI, -1.25 to 0.90; P=.75). Sublingual immunotherapy did not improve nasal response compared to placebo. This is a reversal of sublingual grass pollen immunotherapy for improving seasonal allergy symptoms. | 2017. “AIT [allergen immunotherapy] did not result in a statistically significant reduction in the risk of developing a first allergic disease.”5 The review did not include the RCT. | immunotherapy and allergic rhinitis |
| 245 | Testosterone Treatment and Cognitive Function in Older Men With Low Testosterone and Age-Associated Memory Impairment  Resnick et al. | Endocrinology, Diabetes, and Metabolism | 2/21/2017  JAMA | Some studies have suggested that testosterone therapy may improve cognitive function as people age, because aging is associated with declines in both testosterone levels and cognitive function. 6 7 Sales of testosterone increased 500% between 1993 and 2001 to treat symptoms of hypogonadism, including cognitive function.8 This randomized control trial investigated the cognitive effects of testosterone treatment in men 65 years or older with low testosterone, hypogonadism symptoms, and age-associated memory impairment. The study found that men in the testosterone group (n=247) did not show improved delayed paragraph recall compared to men in the placebo group (n=245) from baseline to 6 and 12 months (adjusted estimated difference, -0.07; 95% CI, -0.92 to 0.79; P=.88). This is a reversal of testosterone treatment for improving cognitive function in older men with low testosterone and age-associated memory impairment. | None found | testosterone and cognitive |
| 246 | Effect of Fibrinogen Concentrate on Intraoperative Blood Loss Among Patients With Intraoperative Bleeding During High-Risk Cardiac Surgery A Randomized Clinical Trial  Bilecen et al. | Surgery | 2/21/2017  JAMA | Due to the likelihood of excessive intraoperative bleeding during high-risk cardiac surgery, it is common to administer fibrinogen concentrate (FC) in order to maintain homeostasis during surgery. 9 10 Despite its common usage to control bleeding, it is unknown whether FC's use in this manner is effective. A randomized control trial enrolling 120 patients who underwent cardiac surgery found that, among the patients who experienced intraoperative bleeding, there was no difference in intraoperative bleeding when comparing the fibrinogen group (n=58) with those receiving placebo (n=57). The fibrinogen group had a median blood loss of 50 mL vs 70 mL in the placebo group (P=.19; absolute difference, 20 mL; 95% CI, -13 to 35 mL). This is a reversal of FC to control bleeding during high-risk cardiac surgery. | 2016. “In surgical patients, FC was associated with reduced bleeding and a lower number of red blood cell units transfused, and it also might reduce mortality. However, none of the analyzed trials was powered for estimation of survival and adverse events with FC use.”11 This review did not include the RCT. | fibrinogen concentrate during surgery |
| 247 | Effect of Inpatient Rehabilitation vs a Monitored Home-Based Program on Mobility in Patients With Total Knee Arthroplasty The HIHO Randomized Clinical Trial  Buhagiar et al. | Orthopedic | 3/14/2017  JAMA | Total knee arthroplasties are performed frequently, and debate over the best form of rehabilitation persists. Some advocate for formal inpatient rehabilitation programs, while others hold that monitored home-based programs are sufficient to rehabilitate mobility and function and improve quality of life.12 The United States offers formal inpatient rehabilitation after knee surgery at higher rates than countries such as Canada or the UK, suggesting potential overuse or underuse.13 This multicenter, randomized control trial compared mobility improvement through inpatient rehabilitation (n=81) vs home programs (n=84) in patients with osteoarthritis undergoing primary total knee arthroplasty. The study found no significant difference in 6-minute walk test at 26 weeks after surgery between inpatient and home program groups (mean difference, -1.01; 95% CI, -25.56 to 23.55). This is a reversal of inpatient rehabilitation in place of monitored home-based programs `for improving mobility in patients with total knee arthroplasties. | 2017. “Home-based rehabilitation after primary TKA was comparable to hospital-based rehabilitation and thus is a significant alternative for patients.“14 This SR/MA did not include this study. | inpatient rehabilitation vs home program knee arthroplasty |
| 248 | Effect of an Integrated Pest Management Intervention on Asthma Symptoms Among Mouse-Sensitized Children and Adolescents With Asthma A Randomized Clinical Trial  Matsui et al. | Pediatrics | 3/14/2017  JAMA | It is a widely held belief that pests, such as mice, cockroaches, and other critters, can lead to asthma attacks,15 16 which are increasingly prevalent in our society.17 Professional pest management companies include an integrated pest management service, which has been advocated for by public and private organizations for reducing asthma in children.15 16 In this trial, an integrated pest management service with education (IPM, n=166) was no better than education alone (n=168) for reducing asthma symptoms in children. Maximal symptom days did not differ between groups at 6, 9, and 12 months (median max symptom days, 2.0 in IPM group vs 2.7 in education alone group; P=.16). This is a reversal of integrated pest management interventions for improving asthma symptoms in children and adolescents with asthma. | None found |  |
| 249 | Effect of Dexmedetomidine on Mortality and Ventilator-Free Days in Patients Requiring Mechanical Ventilation With Sepsis A Randomized Clinical Trial  Kawazoe et al. | Critical care | 4/4/2017  JAMA | Dexmedetomidine, a sedative agent, became increasingly popular for the sedation of patients in the intensive care unit due to its ability to promote “cooperative sedation”, where patients are awake, aware, and able to communicate pain to health care providers while remaining calm and lightly sedated.18 In this randomized controlled trial, the use of dexmedetomidine (n=100) vs no dexmedetomidine (n=101) did not lead to improvements in mortality and ventilator-free days over a 28-day duration. Mortality in the dexmedetomide was 19 patients (22.8%) vs 28 patients (30.8%) in the control group (HR, 0.69; 95% CI, 0.38-1.22; P=0.20). Median ventilator-free days was 20 days vs 18 days (P=0.20). This is a reversal of dexmedetomidine for sedation of patients requiring mechanical ventilation with sepsis. | None found | sedation and mechanical ventilation in sepsis |
| 250 | Effect of Intra-articular Triamcinolone vs Saline on Knee Cartilage Volume and Pain in Patients With Knee Osteoarthritis A Randomized Clinical Trial  McAlindon et al. | Orthopedic | 5/16/2017  JAMA | Osteoarthritis of the knee is a common condition, and it is often recommended that patients with osteoarthritis be treated with corticosteroid injections.19 However, despite the prevalence of its use in this population,20 there is debate regarding the association with corticosteroid injections and joint damage. A 2-year, randomized, placebo-controlled, double-blind trial found that, when compared with a placebo injection (n=70), patients with symptomatic knee osteoarthritis who underwent intra-articular triamcinolone injections (n=70) experienced significantly higher rates of cartilage volume loss (triamcinolone vs saline, -0.21 mm vs -0.10 mm; between-group difference, -0.11 mm; 95% CI, -0.20 to -0.03 mm; P=.01) and no improved knee pain (-1.2 vs -1.9; between-group difference, -0.6; 95% CI, -1.6 to 0.3). This is a reversal of corticoid injections for patients with osteoarthritis of the knee. | None found | corticosteroids and osteoarthritis |
| 251 | Association Between Long-Lasting Intravitreous Fluocinolone Acetonide Implant vs Systemic Anti-inflammatory Therapy and Visual Acuity at 7 Years Among Patients With Intermediate, Posterior, or Panuveitis  MUST trial group | Ophthalmology | 5/16/2017  JAMA | Noninfectious intraocular inflammation, or uveitis, can lead to visual impairment. Currently, there are two treatments commonly used for uveitis; the first approach is through systemic corticosteroids and corticosteroid-sparing immunosuppressive drugs.21 The other, more recent approach was approved by the FDA in 2005 and involves surgically implanting fluocinolone acetonide implants. 22 When systemic therapy (n=126) and intravitreous implants (n=129) approaches were compared with one another in a randomized control trial, it was found that after seven years of follow up, those that were randomized to receive implants had poorer visual acuity than the group who were treated with systemic therapy. Change in mean visual acuity from baseline through 7 years was 1.15 in the systemic therapy group and -5.96 in the implant group (between-group difference, -7.12; 95% CI, -12.4 to -2.14; P=.006). This is a reversal of intravitreous fluocinolone acetonide implants for uveitis. | None found | fluocinolone acetonide implant and panuveitis |
| 252 | Effect of Acupuncture and Clomiphene in Chinese Women With Polycystic Ovary Syndrome A Randomized Clinical Trial  Wu et al. | Obstetrics and gynecology | 6/27/2017  JAMA | Women with polycystic ovary syndrome (PCOS) often struggle with infertility. The first-line treatment for women in this category is clomiphene citrate, a medication meant to induce ovulation, even though it has a high failure rate at 23.4% after five months use.23 Given the lack of success with this approach alone, adjuvant treatments, such as acupuncture, are often recommended in addition to clomiphene to increase fertility.24 The PCOS Acupuncture and Clomiphene Trial found that there was no increase in live birth rates from acupuncture, with (n=235; 29.4%) or without clomiphene (n=223; 13.9%), compared to clomiphene with control acupuncture (n=236; 28.0%; P=.39). This is a reversal of acupuncture for improving live birth rates in women with PCOS. | 2016. A recent SR/MA of RCTs found that acupuncture was not associated with better pregnancy outcomes (clinical pregnancy, live birth) in women with polycystic ovary syndrome, although the number of studies was small and did not include this study.25 | acupuncture and polycystic ovary syndrome |
| 253 | Effect of Radiofrequency Denervation on Pain Intensity Among Patients With Chronic Low Back Pain The Mint Randomized Clinical Trials  Juch et al. | Orthopedic | 7/4/2017  JAMA | Radiofrequency denervation is often recommended for people suffering from chronic low back pain, despite conflicting evidence to its efficacy.26 The treatment aims to damage the pain-conducting nerve to reduce sensations of pain and is minimally invasive, and therefore anesthesiologists support its use in patients with chronic low back pain.26 Three multicenter, nonblinded randomized control trials compared the effects of radiofrequency denervation plus standard care versus standard care alone in patients with chronic low back pain, a positive diagnostic block at the facet joints (facet joint trial, 251 participants), sacroiliac joints (sacroiliac joint trial, 228 participants), or a combination of facet joints, sacroiliac joints, or intervertebral disks (combination trial, 202 participants) and were unresponsive to conservative care. The studies found no difference in clinical improvement between patients who underwent radiofrequency denervation and those who underwent a standardized exercise program alone. The mean differences in pain intensity between denervation and standard care groups was −0.18 (95% CI, −0.76 to 0.40) in the facet joint trial; −0.71 (95% CI, −1.35 to −0.06) in the sacroiliac joint trial; and −0.99 (95% CI, −1.73 to −0.25) in the combination trial. This is a reversal of radiofrequency denervation to reduce pain in patients with chronic low back pain. | 2014. A SR/MA of RCTs and quasi-RCTs concluded that facet joint radiofrequency was more effective than placebo or steroid injection in pain control. However, the quality of these studies was low and did not use an active control group, such as exercise.27 | radiofrequency denervation and back pain |
| 254 | Effect of Oral Methylprednisolone on Clinical Outcomes in Patients With IgA Nephropathy The TESTING Randomized Clinical Trial  Jicheng et al. | Nephrology | 8/1/2017 | Immunoglobulin A nephropathy often leads to end-stage kidney disease and other kidney problems. Corticosteroid therapy is often recommended as treatment, despite conflicting evidence about its efficacy and safety.28 In a multicenter, double-blind, randomized study that set out to establish the safety and efficacy of methylprednisolone (full-dose corticosteroid therapy; n=134) compared to placebo (n=126), it found that methylprednisolone was associated with a greater incidence of serious adverse events (14.7% in methylprednisone group vs 3.2% in placebo group; P=.001; risk difference, 11.5%, 95% CI, 4.8%-18.2%), so much so that the trial was discontinued. This is a reversal of administering oral methylprednisolone to patients with IgA nephropathy. | 2015. Cochrane review. “The optimal management of IgAN remains uncertain although corticosteroid therapy may lower the risks of kidney disease progression and need for dialysis or transplantation. Evidence for treatment effects of immunosuppressive agents on mortality, infection, and cancer is generally sparse or low-quality and insufficient to guide clinical practice.” 29 This review did not include this RCT. | PubMed |
| 255 | Effect of Endovascular Contact Aspiration vs Stent Retriever on Revascularization in Patients With Acute Ischemic Stroke and Large Vessel Occlusion  The ASTER Randomized Clinical Trial  Lapergue et al. | Neurology | 8/1/2017  JAMA | Mechanical thrombectomy has become the new standard of care for patients with acute ischemic stroke and large vessel occlusion, but debate remains about the appropriate technique for endovascular revascularization - specifically between contact aspiration and stent retriever technique, with contact aspiration gaining popularity.30 The Contact Aspiration vs Stent Retriever for Successful Revascularization (ASTER) trial assessed the two techniques and found that among patients with ischemic stroke in the anterior circulation undergoing thrombectomy, there was no additional benefit among patients who underwent contact aspiration compared to stent retriever. The proportion of patients with successful revascularization in the contact aspiration group was 85.4% (n = 164) vs 83.1% (n = 157) in the stent retriever group (OR, 1.20; 95% CI, 0.68-2.10; P = .53; difference, 2.4%; 95% CI, −5.4% to 9.7%). | 2017. “In a separate network of seven RCTs (MR-CLEAN, ESCAPE, EXTEND-IA, SWIFT-PRIME, REVASCAT, THERAPY, ASTER; 1737 patients), first-line stent retriever was associated with a higher top rank probability of functional independence than aspiration (95% vs 54%), with comparable safety outcomes..”31 | Google Scholar - MA cited RCT |
| 256 | Effect of Cerebral Embolic Protection Devices on CNS Infarction in Surgical Aortic Valve Replacement A Randomized Clinical Trial  Mack et al. | Neurology | 8/8/2017  JAMA | After patients undergo surgical aortic valve replacement or transcatheter aortic valve replacement (TAVR), they are at increased risk for central nervous system infarction. As such, cerebral embolic protection devices have been developed, namely the Embol-X (Edwards Lifesciences) intra-aortic filtration and CardioGard (CardioGard) devices.32 A trial evaluating the efficacy and adverse effects of such devices found that, when comparing a suction-based extraction device (n=118) and an intra-aortic filtration device (n=133) with a standard aortic cannula (n=132), there was no significant reduction in risk of central nervous system (CNS) injury in patients undergoing TAVR. The absolute difference in rate of freedom from CNS infarction at 7 days compared to control was 1.3 (95% CI, -11.2 to 13.8; P=84) for suction-based extraction and 6.9 (95% CI, -4.2 to 17.9%; P=.22) with intra-aortic filtration. This is a reversal of embolic protection devices for protecting against infarction during surgical aortic valve replacement. | 2016. “Use of EP [embolic protection] seems to be associated with reductions in imaging markers of cerebral infarction and early clinical neurological effectiveness in patients undergoing TAVR.”33 The RCT was not included as part of this review. A total of 252 participants from 4 studies were included in this meta-analysis compared to the 380 participants in the Mack et al study. | cerebral embolic protection devices and aortic valve replacement |
| 257 | Effect of Levosimendan on Low Cardiac Output Syndrome in Patients With Low Ejection Fraction Undergoing Coronary Artery Bypass Grafting With Cardiopulmonary Bypass The LICORN Randomized Clinical Trial  Cholley et al. | Cardiovascular | 8/8/2017  JAMA | Low cardiac output syndrome after coronary bypass grafting surgery is associated with a higher risk of complications, such as pulmonary impairment, myocardial infarction, stroke, and renal failure.34 Treatment for low cardiac output syndrome had typically involved inotropic agents and mechanical assist devices, yet current inotropic agents have increased risk of morbidity and mortality after surgery. Levosimendan is a calcium sensitizing inotropic agent used in patients undergoing cardiac surgery that was thought to have fewer adverse events.35 36 This study found that, compared to placebo (n=156), levosimendan (n=158) did not reduce the incidence of the composite end point of prolonged catecholamine infusion, use of left ventricular mechanical assist device, or renal replacement therapy (occurred in 52% of levosimendan group vs 61% placebo group) in patients with low ejection fraction who underwent coronary artery bypass grafting (absolute risk difference taking into account center effect, −7%; 95% CI, −17% to 3%; P = .15). This is a reversal of levosimendan in treating low cardiac output syndrome in patients with low ejection fraction undergoing coronary artery bypass grafting with cardiopulmonary bypass. | 2018. “Pooled analysis of 5 low risk of bias trials (1910 patients) showed no association between levosimendan and mortality (OR 0.86 [95% CI, 0.62, 1.18], p=0.34, TSA inconclusive), acute kidney injury, need of renal replacement therapy, myocardial infarction, ventricular arrhythmias, and serious adverse events, but an association with higher incidence of supraventricular arrhythmias (RR 1.11 [95% CI, 1.00, 1.24], p=0.05, TSA inconclusive) and hypotension (RR 1.15 [95% CI, 1.01, 1.30], p=0.04, TSA inconclusive).” 37 | levosimendan low cardiac output syndrome "Coronary Artery Bypass" |
| 258 | Effect of Natriuretic Peptide–Guided Therapy on Hospitalization or Cardiovascular Mortality in High-Risk Patients With Heart Failure and Reduced Ejection Fraction A Randomized Clinical Trial  Felker et al. | Cardiovascular | 8/22/2017  JAMA | Patients with heart failure (HF) were shown to have significantly improved outcomes when administered evidence-based therapies targeting neurohormonal activation. Yet many patients are not always treated with these agents or are treated with inappropriate doses in clinical practice.38 39 Natriuretic peptides are biomarkers that are associated with adverse outcomes in heart failure and have shown to decline in response to recommended therapies.40 While not the standard of care, natriuretic peptide-guided therapy for heart failure has been mentioned in AACF/AHA guidelines and has been studied in clinical trials over the last 2 decades.41 This study found that biomarker-guided therapy (n=446) was no more effective than a usual care strategy (n=448) for preventing a composite of HF hospitalization or cardiovascular mortality (37% in biomarker-guided group vs 37% in usual care group; adjusted HR. 0.98; 95% CI, 0.65-1.37; P=.75) in high-risk patients with HF and reduced ejection fraction. This is a reversal of natriuretic peptide-guided therapy for high-risk patients with HF and reduced ejection fraction. | None found | BNP guided therapy and heart failure |
| 259 | Effect of Axillary Dissection vs No Axillary Dissection on 10-Year Overall Survival Among Women With Invasive Breast Cancer and Sentinel Node Metastasis The ACOSOG Z0011 (Alliance) Randomized Clinical Trial  Guiliano et al. | Oncology | 9/12/2017  JAMA | Axillary lymph node dissection (ALND) and sentinel lymph node dissection (SLND) have both been used in the treatment of breast cancer. ALND is a more invasive procedure and was the considered standard of care in the 1990s. By the end of the 1990s, ALND had fallen out of practice while SLND, a less invasive therapy, became more popular.42-45 This study compared ALND (n=420) to SLND (n=436) in patients with cT1-2N0 breast cancer and metastases to 1 or 2 sentinel lymph nodes and found that 10-year overall survival was 86.3% in the SLND alone group and 83.6% in the ALND group (HR, 0.85; 1-sided 95% CI, 0-1.16; noninferiority P = .02). SLND was noninferior to ALND. | 2015. “ALND appears to positively impact on overall and recurrence-free survival from breast cancer. These data highlight the enduring benefits of ALND in an era where adjuvant therapies are being promoted to manage regionally advanced/metastatic disease.”46 This review did not include the RCT and included observational studies. | axillary dissection with invasive breast cancer |
| 260 | Effect of Routine Low-Dose Oxygen Supplementation on Death and Disability in Adults With Acute Stroke The Stroke Oxygen Study Randomized Clinical Trial  Roffe et al. | Neurology | 9/26/2017  JAMA | Stroke patients often experience hypoxia, which can lead to neurologic problems and higher mortality rates. As such, several guidelines have advocated the use of oxygen in stroke patients to prevent hypoxia and secondary brain damage.47 48 This study compared continuous oxygen (n=2567), nocturnal oxygen (2561), and control (oxygen only if clinically indicated n=2549) in patients with acute stroke and found that there was no difference in disability between the oxygen groups and control group (OR, 0.97; 95% CI, 0.89-1.05; P=.47). This is a reversal of routine low-dose oxygen supplementation to prevent disability in patients with acute stroke. | None found | oxygen supplementation in stroke |
| 261 | Effect of an Early Resuscitation Protocol on In-hospital Mortality Among Adults With Sepsis and Hypotension A Randomized Clinical Trial  Andrews et al. | Critical care | 10/3/2017 | A decline in rates of mortality from sepsis has been seen in developed countries,49 and many accredit the decline to sepsis protocols that call for early resuscitation with intravenous (IV) fluid boluses and vasopressors.50 51 In developing countries, where sepsis mortality continues to be a pressing issue, many guidelines do not call for early resuscitation with IV fluid and vasopressors. Attempts to implement these sepsis guidelines have led to mixed results.52-54 In this study, an early resuscitation protocol for sepsis (n=106) compared to usual care (n=103) lead to increased in-hospital mortality rates in Zambian adults with sepsis and hypotension (48.1% in sepsis protocol group vs 33.0% in usual care group; RR, 1.46; 95% CI, 1.04-2.05; P=.03). This is a reversal of early resuscitation protocol for sepsis in resource-limited settings. | 2015. “EGDT [early goal-directed therapy] is not superior to usual care for ED patients with septic shock but is associated with increased utilisation of ICU resources.”55 This review did not include the RCT. | early resuscitation protocol and sepsis and hypotension |
| 262 | Effect of Lung Recruitment and Titrated Positive End-Expiratory Pressure (PEEP) vs Low PEEP on Mortality in Patients With Acute Respiratory Distress Syndrome A Randomized Clinical Trial  ART Investigators | Critical care | 10/10/2017  JAMA | Use of mechanical ventilation for patients with acute respiratory distress (ARDS) can, in some cases, lead to lung injury. Positive end-expiratory pressure (PEEP) has been used to prevent injury, but whether to use low or high PEEP has been questioned.56-59 One meta-analysis, based on results from several trials, suggested found in a sub analysis the use of titration that higher levels in PEEP is associated with improved survival in patients with ARDS.58 High PEEP was used frequently in the 1970’s and is now sometimes part of open lung and protective lung ventilation strategies.60 This trial found that lung recruitment and titrated PEEP (n=501), when compared to low PEEP (n=509), led to higher 28-day all-cause mortality (HR, 1.20; 95% CI, 1.01 to 1.42; P=0.41). This is a reversal of titrated PEEP for patients with ARDS. | 2017. “Use of higher PEEP is unlikely to improve clinical outcomes among unselected patients with ARDS.”61 This review did not include the RCT. | titrated positive end-expiratory pressure vs. low peep ARDS |
| 263 | Effect of Robotic-Assisted vs Conventional Laparoscopic Surgery on Risk of Conversion to Open Laparotomy Among Patients Undergoing Resection for Rectal Cancer The ROLARR Randomized Clinical Trial  Jayne et al. | Oncology | 10/24-31/2017  JAMA | Robotic-assisted laparoscopic surgery was first used for rectal cancer in 2007,62 and its use has increased in the past decade because of better visualization of the surgical site and improved dexterity.63 In this trial, patients undergoing surgery for rectal adenocarcinoma did not have reduced risk of conversion to open laparotomy with the use of robotic-assisted laparoscopic surgery (n=235), compared to those who received conventional laparoscopic surgery (n=224). Rate of conversion to open laparotomy was 8.1% in the robotic-assisted laparoscopic group and 12.2% in the conventional laparoscopic group (unadjusted risk difference = 4.1%; 95% CI, −1.4% to 9.6%; adjusted OR = 0.61; 95% CI, 0.31 to 1.21; P = .16). This is a reversal of robotic-assisted laparoscopic surgery for patients undergoing resection for rectal cancer. | None found | robotic-assisted vs conventional laparoscopic surgery rectal cancer resection |
| 264 | Effect of a Single Dose of Oral Opioid and Nonopioid Analgesics on Acute Extremity Pain in the Emergency Department A Randomized Clinical Trial  Chang et al. | Public health/Preventive medicine | 11/7/2017  JAMA | Opioids are commonly prescribed for pain in the emergency department and are the first-line pain relievers that are administered, but with the increasing number of people becoming dependent on them, alternative treatments should be evaluated.64 Ibuprofen and acetaminophen are nonopioid alternatives that are commonly used together for the treatment of pain.65 This study randomized patients with moderate to severe acute extremity pain admitted to the ER to one of four groups, which were administered acetaminophen plus: (1) ibuprofen (n=101), (2) oxycodone (n=104), (3) hydrocodone (n=103), or (4) codeine (n=103). The study found that opioid-based analgesics did not lead to better pain control than a combination of ibuprofen and acetaminophen. Two hours after ingestion, decline in pain scores in the ibuprofen group was 4.3, oxycodone was 4.4, hydrocodone was 3.5, and codeine was 3.9 (P=.053). The greatest difference pain score decline was between the oxycodone and hydrocodone groups (0.9; 99.2% CI, −0.1 to 1.8), which was less than the minimum clinically important difference in pain score of 1.3. This is a reversal of opioid-based analgesics for acute extremity pain the emergency department. | There were several MA on pain management but none were found that were in the emergency room and only one was found that directly compared opioids and nonopioids, but this was written in German. | opioid vs nonopioid analgesics in emergency department |
| 265 | Effect of Sertraline on Depressive Symptoms in Patients With Chronic Kidney Disease Without Dialysis Dependence The CAST Randomized Clinical Trial  Hedayati et al. | Psychiatry | 11/21/2017  JAMA | Up to 25% of patients with chronic kidney disease have depression, which is 4 times higher than in the general population.66 Because of safety concerns, people with chronic kidney disease are not always included in depression medication trials, although these medications, including sertraline, are recommended for patients with depression, regardless of chronic kidney disease status. 67 68 In this study, sertraline (n=97) was no better than placebo (n=96) in treating depression in patients with non-dialysis-dependent chronic kidney disease. Difference in depressive symptom severity scores from baseline to 12 weeks was -4.1 in the sertraline group and -4.2 in the placebo group (between-group difference, 0.1; 95% CI, -1.1 to 1.3; P=.82). This is a reversal of sertraline for treating depressive symptoms in patients with chronic kidney disease. | None found | sertraline depression chronic kidney disease (also antidepressants or SSRI in place of sertraline) |
| 266 | Effect of a Quality Improvement Intervention With Daily Round Checklists, Goal Setting, and Clinician Prompting on Mortality of Critically Ill Patients A Randomized Clinical Trial  CHECKLIST-ICU Investigators | Critical care | 4/12/2016  JAMA | Recently, it has been proposed that checklists be used to ensure that healthcare providers do not omit critical elements of care in places such as the intensive care unit (ICU).69 Various studies suggest that such checklists lead to improved quality of care and patient outcomes.70 71 However, evidence is lacking to support this hypothesis. A randomized controlled trial in Brazil found that the use of a multifaceted quality improvement intervention with daily checklists (n of patients= 3327; n of ICUs=59) did not reduce mortality rates in ICUs compared to routine care (n of patients= 3434; n of ICUs=59). In-hospital mortality at 60 days was similar between groups, with 1096 deaths (32.9%) in the intervention group and 1196 deaths (34.8%) in the routine care group (OR, 1.02; 95% CI, 0.82-1.26; P=.88). This is a reversal of multifaceted quality improvement intervention with daily checklists in ICUs. | None found | quality improvement (with our without checklist) intervention in critically ill |
| 267 | Effect of Chemoradiotherapy vs Chemotherapy on Survival in Patients With Locally Advanced Pancreatic Cancer Controlled After 4 Months of Gemcitabine With or Without Erlotinib The LAP07 Randomized Clinical Trial  Hammel et al. | Oncology | 5/3/2016  JAMA | Administering chemotherapy plus adjuvant radiotherapy in the treatment of locally advanced prostate cancer (LAPC) is commonly practiced,72 although the addition of radiotherapy is controversial and not recommended outside of clinical trials for this patient population.73 A 2003 national study found that between 1991 and 1996, 24% of patients with LAPC received chemoradiation.72 This randomized controlled trial investigated the effects of chemotherapy (n=136) vs chemoradiotherapy (n=133) in patients with LAPC with disease controlled after 4 months of induction chemotherapy. Median overall survival was not significantly different between chemotherapy at 16.5 months (95% CI, 14.5-18.5 months) and chemoradiotherapy at 15.2 months (95% CI, 13.9-17.3 months; HR, 1.03; 95% CI, 0.79-1.34; P = .83). This is a reversal of chemoradiotherapy versus chemotherapy alone for patients with locally advanced pancreatic cancer. | 2016. “This meta-analysis showed that CRT [chemoradiotherapy] showed no significant effect on OS [overall survival] and PFS [progression-free survival] when compared to non-CRT. Neoadjuvant CRT showed no significant effect over postoperative adjuvant CRT.”74 This review did not include the RCT. | chemotherapy vs chemoradiotherapy in pancreatic cancer |
| 268 | Effect of Escitalopram on All-Cause Mortality and Hospitalization in Patients with Heart Failure and Depression The MOOD-HF Randomized Clinical Trial  Angermann et al. | Psychiatry | 6/28/2016  JAMA | Depression after heart failure is common and has been associated with poor health outcomes.75 Psychotherapy and pharmacological medicine are generally used to treat patients with heart failure and depression,76 but there is not strong evidence for their efficacy in this population in reducing depression or cardiovascular morbidities.77 This study compared the effect of escitalopram (n= 185), a selective serotonin reuptake inhibitor, versus placebo (n=187) on a composite of time to all-cause death or hospitalization in patients with chronic heart failure with reduced ejection fraction and depression and found no benefit to the drug (HR, 0.99; 95% CI, 0.76-1.27; P=.92). Furthermore, escitalopram did not improve depression compared to placebo (mean depression rating score, 21.4 vs 12.5; between-group difference, -0.9; 95% CI, -2.6 to 0.7; P=.26). This is a reversal of escitalopram to reduce incidence of death or hospitalization and for reducing depressive symptoms in patients with heart failure and depression. | None found |  |
| 269 | Effect of Palliative Care–Led Meetings for Families of Patients With Chronic Critical Illness A Randomized Clinical Trial  Carson et al. | Critical care | 7/5/2017  JAMA | Family members of patients with chronic critical illness often experience emotional distress, including anxiety, depression, and post-traumatic stress disorder (PTSD).78 Support and communication of expected outcomes of patients with chronic critical illness is often insufficient in helping families to create goals of care.79 While various interventions to facilitate communication about prognosis and goals of care in the ICU have been investigated, their results are mixed.80 81 The 2008 American Thoracic Society Clinical Policy Statement recommends that palliative care specialists offer support for families in planning and providing care.82 This study found that among families of patients with chronic critical illness, palliative care-led support meetings (n=130) did not reduce anxiety or depression compared to usual care (n=126) and may have increased PTSD (P=.0495). Hospital Anxiety and Depression Scale symptom scores for intervention and placebo at 3 months were 12.2 vs 11.4, respectively (between-group difference, 0.8; 95% CI, -0.9 to 2.6; P=.34). Palliative care support meetings in this population did not show benefit. This is a reversal of palliative care-led meetings for families of patients with chronic critical illness for reducing PTSD severity. | 2017. “Despite the existence of consensus-based family meeting guidelines, there is a paucity of evidence to support family meetings in the inpatient palliative care setting.”83 This review did not include this RCT. | palliative care and meetings for families of patients |
| 270 | Effect of Patient Navigation With or Without Financial Incentives on Viral Suppression Among Hospitalized Patients With HIV Infection and Substance Use A Randomized Clinical Trial  Metsch et al. | Infectious | 7/21/2016  JAMA | Patient navigation was first used in 2007 to help patients in underserved populations receive the best available care in order to improve health outcomes.84 Financial incentives to encourage people to engage in healthy habits have been used in the US for at least several decades, although use in the field of HIV has been more recent.85 In this study, patient navigation with (n=263) or without (n=255) financial incentives did not result in better HIV viral suppression or death, compared to usual care (n=256). The usual care group experienced treatment success in 34.1% of patients, compared to navigation-only at 35.7% (treatment difference, 1.6%; 95% CI, -6.8 to 10.0%; P=.80) and compared to navigation plus incentives at 38.6% (treatment difference, 4.5%, 95% CI, -4.0% to 12.8%: P=.68). This is a reversal of patient navigation and financial incentives for patients with HIV infections. | None found | cash (or financial) incentives and hiv |
| 271 | Effect of Radiosurgery Alone vs Radiosurgery With Whole Brain Radiation Therapy on Cognitive Function in Patients With 1 to 3 Brain Metastases A Randomized Clinical Trial  Brown et al. | Oncology | 7/26/2016  JAMA | Stereotactic radiosurgery (SRS) is the mainline treatment for patients with brain metastases, but this treatment alone is often insufficient to stop intracranial tumor progression. As such, whole brain radiotherapy (WBRT) is often recommended afterwards, despite conflicting evidence that this may lead to cognitive deterioration and decreased quality of life.86 87 A multi-institutional randomized control trial found that - among patients with 1 to 3 brain metastases - SRS alone (n=63) resulted in fewer patients with cognitive deterioration at three months than did the group that underwent SRS and adjuvant WBRT (n=48). Among SRS alone, 63.5% of patients experienced cognitive decline compared to 91.7% in the WBRT group, with a difference of -28.2% (90% CI, -41.9% to -14.4%; P=.001). This is a reversal of WBRT for patients with 1 to 3 brain metastases. | 2017. A SR/MA that included this study found that overall tumor control rate was better among those receiving SRS, compared to SRS+WBRT, but overall survival was no better. This MA did not look at cognitive deterioration.88 | GoogleScholar - MA cited RCT |
| 272 | Effect of Topical Intranasal Therapy on Epistaxis Frequency in Patients With Hereditary Hemorrhagic Telangiectasia A Randomized Clinical Trial  Whitehead et al. | Public health/Preventive medicine | 9/6/2017  JAMA | Hereditary hemorrhagic telangiectasia (HHT) is a genetic condition that causes abnormal blood vessel formation in mucus membranes and commonly leads to recurrent and spontaneous epistaxis. Treatment for epistaxis in this population can be serious, requiring cautery and surgery, but other less invasive methods, such as systemic oestrogens and nasal sprays containing bevacizumab or tranexamic acid have also been used to prevent subsequent bleeding.89 90 In this randomized controlled trial, twice daily nose spray treatments of bevacizumab (n=24), estriol (n=25), tranexamic acid (n=30), or placebo (n=27) were given to patients with HHT-related epistaxis. None of the interventions tested were superior to placebo in reducing epistaxis frequency (P=.97). This is a reversal of topical intranasal therapy for patients with hereditary hemorrhagic telangiectasia. | None found | hemorrhagic telangiectasia and intranasal (with or without tranexamic acid or bevacizumab) therapy |
| 273 | Effect of Wearable Technology Combined With a Lifestyle Intervention on Long-term Weight Loss The IDEA Randomized Clinical Trial  Jakicic et al. | Public health/Preventive medicine | 9/20/2017  JAMA | Wearable technologies have become increasingly popular as tools to assist in weight loss since they help track physical activity and estimate calorie burn.91 This clinical trial randomized adults who were participating in a weight-loss program (including a low-calorie diet, increases in physical activity, group counseling sessions, telephone counseling sessions, text message prompts, and access to study materials on a website) to use a wearable device and accompanying web interface (enhanced intervention group, n=237) or to a self-monitoring website (standard intervention group, n=233). The study found that the standard intervention group experienced significantly more weight loss than the enhanced intervention group after 24 months (5.9 kg vs 3.5 kg; difference 2.4 kg; 95% CI, 1.0-3.7; P=.002). This is a reversal of wearable technology for long-term weight loss. | 2017.While this review concluded that wearable technology reduces sedentary behavior, there were no SR/MA on whether these devices reduce weight.92 This review did not include the RCT. | wearable technology and weight loss |
| 274 | Effect of Cranberry Capsules on Bacteriuria Plus Pyuria Among Older Women in Nursing Homes A Randomized Clinical Trial  Juthani-Mehta et al. | Urology | 11/8/2016  JAMA | Bacteriuria plus pyuria is prevalent among female residents at nursing homes, and it is often recommended that women take cranberry capsules to prevent such infections from occurring in lieu of treatment with antibiotics. This randomized control trial found that, compared to a placebo (n=93), prophylactic treatment with cranberry capsules (n=92) for women in nursing homes did not alter the presence of bacteriuria plus pyuria over the course of a year (29.1% in the cranberry group vs 29.0% in the placebo group; OR, 1.01; 95% CI, 0.61-1.66; P=.98). This is a reversal of cranberry capsules for preventing bacteriuria plus pyuria in older women in nursing homes. | None found | cranberry for urinary tract infections in nursing homes |
| 275 | Chlorhexidine Bathing and Health Care–Associated Infections A Randomized Clinical Trial  Noto et al. | Public health/Preventive medicine | 1/27/2015  JAMA | In order to prevent infections, it is common practice to bathe hospitalized patients with broad-spectrum antimicrobial agents such as chlorhexidine. This is based on the understanding that skin can host a number of pathogens.93 However, this randomized clinical trial found that, compared to non-antimicrobial cloths (n=4852), daily bathing with chlorhexidine (n= 4488) had no effect on rates of a composite of central line–associated bloodstream infections, catheter-associated urinary tract infections, ventilator-associated pneumonia, and *Clostridium difficile* (2.86 per 1000 patient-days in treatment group vs 2.90/1000 in control group; rate difference, -0.04; 95% CI, -1.01 to 1.01; P=.95). This is a reversal of chlorhexidine bathing for hospitalized patients. | 2016. “No relevant studies were identified regarding the clinical effectiveness of CHG wipes for infection prevention in adult patients in acute care, or regarding the cost-effectiveness of the use of CHG wipes in acute or critical care settings; therefore, no summary can be provided for these questions.”94 | PubMed suggestion |
| 276 | Effect of Sedative Premedication on Patient Experience After General Anesthesia A Randomized Clinical Trial  Maurice-Szamburski et al. | Anesthesiology | 3/3/2015  JAMA | Premedication with lorazepam for anxiety prior to sedation is a common practice for patients undergoing general anesthesia.95 96 A randomized control trial compared pre-medication sedation with lorazepam (n=330), no pre-medication (n=319), and placebo (n=322) in patients undergoing surgery and found that there was no difference among the groups in self-reported improvement (patient satisfaction scores, 72 lorazepam vs 73 no premedication vs 71 placebo; P=.38). In fact, these patients had lower rates of early cognitive recovery (51% vs 71% vs 64%; P<.001) as well as prolonged times to extubation (17 minutes vs 12 min vs 13 min; P<.001). This is a reversal of lorazepam for reducing anxiety prior to sedation in patients undergoing general anesthesia. | None found | sedative premedication after general anesthesia |
| 277 | Surgical vs Nonsurgical Treatment of Adults With Displaced Fractures of the Proximal Humerus The PROFHER Randomized Clinical Trial  Rangan et al. | Orthopedic | 3/10/2015  JAMA | Proximal humeral fractures are common among people older than 65 years of age. Treatment for this type of fracture can be surgical or nonsurgical. Surgical treatment usually involves internal fixation or humeral head replacement.97 A randomized control trial compared surgical (n=114) versus nonsurgical (n=117) approaches to treating proximal humeral fractures and found that there were no differences in outcomes at 2 years following the fracture. Average Oxford Shoulder Scores was 39.07 points for the surgical group and 38.32 points for the nonsurgical group (difference, 0.75 points; 95% CI, -1.33 to 2.84 points; P=.48). This is a reversal of surgical treatment for proximal humeral fractures in adults. | 2015. Cochrane review. “There is high or moderate quality evidence that, compared with non-surgical treatment, surgery does not result in a better outcome at one and two years after injury for people with displaced proximal humeral fractures involving the humeral neck and is likely to result in a greater need for subsequent surgery.” 98 The review did not include the RCT. | PubMed suggestion |
| 278 | Effect of a Retrievable Inferior Vena Cava Filter Plus Anticoagulation vs Anticoagulation Alone on Risk of Recurrent Pulmonary Embolism A Randomized Clinical Trial  Mismetti et al. | Pulmonary | 4/28/2015  JAMA | For patients who present with acute venous thromboembolism, it is becoming increasingly popular for them to receive a retrievable inferior vena cava filter in addition to anticoagulation.99 100 A randomized control trial evaluated the efficacy and safety of this procedure in addition to anticoagulation (n=200) as opposed to anticoagulant therapy alone (n=199), and found that among people with severe acute pulmonary embolism, the addition of a retrievable inferior vena cava filter did not reduce their risk of symptomatic recurrent pulmonary embolism at 3 months (3 patients in both groups; RR with filter, 2.00; 95% CI, 0.51-7.89; p=.50). This is a reversal of the addition of retrievable inferior vena cava filters to anticoagulation therapy for patients with acute venous thromboembolism. | 2016. “Inferior vena cava filter in addition to anticoagulation was not associated with a reduction in the incidence of recurrent pulmonary embolism as compared with anticoagulation alone in patients with deep vein thrombosis in the short term.”101 | GoogleScholar - MA cited RCT |
| 279 | Effect of a 24-Month Physical Activity Intervention vs Health Education on Cognitive Outcomes in Sedentary Older Adults The LIFE Randomized Trial  Sink et al. | Public health/Preventive medicine | 8/25/2015  JAMA | Moderate-intensity physical activity that includes activities promoting flexibility and balance is recommended for older adults.102 This recommendation is based upon evidence that shows improvements in many health outcomes, including some evidence of improved cognition. In this RCT, a 24-month exercise program (n=735) was no better than a health education program (n=741) in improving cognitive function. At 24 months, mean Digit Symbol Coding scores were 46.26 points in the physical activity group vs 46.28 in the health education group (mean difference, -0.03; 96% CI, -0.20 to 0.24 words, P= .84). This is a reversal of physical activity interventions for improving cognitive functioning in sedentary older adults. | 2017. “Evidence from RCTs is limited and does not support that exercise reduces the risk of developing clinically important cognitive outcomes.”103 | GoogleScholar - MA cited RCT |
| 280 | Effect of Omega-3 Fatty Acids, Lutein/Zeaxanthin, or Other Nutrient Supplementation on Cognitive Function The AREDS2 Randomized Clinical Trial  Chew et al. | Public health/Preventive medicine | 8/25/2015  JAMA | Supplemental omega-3 fatty acids are thought to be beneficial for brain health because there is a high concentration of fatty acids in the brain, which helps in the flow of electrical signals.104 Researchers and physicians have promoted the intake of omega-3 fatty acids for the prevention of many health outcomes, including cognitive decline.105 In the AREDS2 trial, supplementation with omega-3 fatty acids (n= 1521) did not have an effect on cognitive function compared to no supplementation (n=1503) in patients who were at risk for developing late age-related macular degeneration. There was no difference in change in cognitive functioning scores between the supplement and no supplement group (-0.19 vs -0.18; difference in yearly change, -0.03; 995 CI, -0.20 to 0.13; P=.63). This is a reversal of omega 3 fatty acids for protecting cognitive functioning. | 2017. AHRQ report. “ Low-strength evidence suggests omega-3 fatty acids and ginkgo biloba did not reduce CATD incidence or improve cognitive performance in adults with normal cognition.” 106 | PubMed suggestion |
| 281 | Rehabilitation After Immobilization for Ankle Fracture The EXACT Randomized Clinical Trial  Moseley et al. | Orthopedic | 10/6/2015  JAMA | It is often recommended that people who have fractured their ankle undergo a supervised exercise program of some kind after the immobilization of the ankle fracture is complete, but the effects of this type of rehabilitation are not clearly established.107 This randomized control trial did not find any additional benefits for people who had isolated and uncomplicated ankle fracture who underwent a supervised exercise program (n=106) as compared with those who only received advice (n=108) following the removal of immobilization. At 3 months, mean difference in activity limitation score was 0.4 (95% CI, -3.9 to 3.2) and mean difference in quality of life was -0.04 (95% CI, -0.09 to 0.01). This is a reversal of rehabilitation after immobilization for ankle fracture. | None found | rehabilitation after ankle fracture |
| 282 | Naproxen With Cyclobenzaprine, Oxycodone/Acetaminophen, or Placebo for Treating Acute Low Back Pain A Randomized Clinical Trial  Friedman et al. | Orthopedic | 10/20/2015  JAMA | Low back pain is very common and treatment protocols in emergency departments are heterogeneous, ranging from medication with nonsteroidal anti-inflammatory drugs (NSAIDs), skeletal muscle relaxants, and opioids.108 A randomized study found that among patients with acute, nontraumatic, nonradicular low back pain presenting in the emergency room, adding cyclobenzaprine (n=108), oxycodone plus acetaminophen (n=108), or placebo (n=107) to naproxen did nothing to improve functional outcomes or pain for these patients one week later. Between-group difference in mean Roland-Morris Disability Questionnaire improvement for cyclobenzaprine vs placebo was 0.3 (98.3% CI, −2.6 to 3.2; P = .77), for oxycodone/acetaminophen vs placebo, 1.3 (98.3% CI, −1.5 to 4.1; P = .28), and for oxycodone/acetaminophen vs cyclobenzaprine, 0.9 (98.3% CI, −2.1 to 3.9; P = .45). This is a reversal of cyclobenzaprine and oxycodone/acetaminophen for treating acute low back pain in emergency departments in addition to naproxen. | None found | pharmacologic treatment for low back pain |
| 283 | Autologous Hematopoetic Stem Cell Transplantation for Refractory Crohn Disease A Randomized Clinical Trial  Hawkey et al. | Gastroenterology/Hepatology | 12/15/2015  JAMA | Crohn disease is a chronic relapsing inflammatory condition of the gastrointestinal tract that can result in lifelong ill health, impaired quality of life, and reduced life expectancy. Immunosuppressive drugs are standard of care for Crohn disease, but some patients do not respond or become unresponsive to treatment. Hematopoietic stem cell transplantation (HSCT) might have a role to play in some of these treatment-resistant cases. Case reports and series describe long-term treatment-free disease regression with autologous and allogeneic HSCT in some but not all patients with Crohn disease and in other patients with conditions that have autoimmune pathology, such as systemic sclerosis.109 This study found that among adult patients with refractory Crohn disease not amenable to surgery who had impaired quality of life, HSCT (n=21), compared with conventional therapy (n=21), did not result in a statistically significant improvement in sustained disease remission at 1 year (remission in 2 patients in the HSCT group vs 1 patient in control group; absolute difference, 4.2%; 95% CI, -14.2% to 22.6%; P=.60). The HSCT group had 76 adverse events compared to 38 in the control group. This is a reversal of autologous HSCT for refractory Crohn disease. | A 2017 SR/MA concluded that hematopoietic stem cell transplantation led to high remission rates. It should be noted that this SR was not limited to RCTs (included case-series), and the information they used for this RCT did not appear to be correct.110 | PubMed suggestion |
| 284 | Effect of Prehospital Induction of Mild Hypothermia on Survival and Neurological Status Among Adults With Cardiac Arrest A Randomized Clinical Trial  Kim et al. | Cardiovascular | 1/1/2014  JAMA | Mild therapeutic hypothermia was first used in the treatment of patients with cardiac arrest because people thought this was a way to reduce cerebral oxygen demand, which could improve neurological outcomes in these patients. This practice became more common and was incorporated into several sets of guidelines after several positive randomized controlled trials, some encouraging the cooling as soon as spontaneous circulation returns. 111-113 Some hospitals even incorporated pre-hospital cooling into their treatment protocol.114 This randomized controlled study compared therapeutic hypothermia with (n=292) and without (n=396) ventricular fibrillation to no hypothermia with (n=291) and without (n=380) ventricular fibrillation and found that the addition of therapeutic hypothermia to standard care did not improve survival or neurological status in cardiac patients. Survival to hospital discharge was similar among the intervention and control groups among patients with VF (62.7% [95% CI, 57.0%-68.0%] vs 64.3% [95% CI, 58.6%-69.5%], respectively; P = .69) and among patients without VF (19.2% [95% CI, 15.6%-23.4%] vs 16.3% [95% CI, 12.9%-20.4%], respectively; P = .30). This is a reversal of mild hypothermia for cardiac arrest with or without ventricular fibrillation. | 2016. Cochrane review. “Currently, there is no convincing evidence to clearly delineate beneficial or harmful effects of pre-hospital induction of cooling in comparison to in-hospital induction of cooling. This conclusion is based on very low quality evidence.”115 | PubMed suggestion |
| 285 | Mechanical Chest Compressions and Simultaneous Defibrillation vs Conventional Cardiopulmonary Resuscitation in Out-of-Hospital Cardiac Arrest The LINC Randomized Trial  Rubertsson et al. | Critical care | 01/01/2014  JAMA | Cardiopulmonary resuscitation (CPR) is practiced on cardiac arrest patients to restore spontaneous circulation, but there are drawbacks with the procedure that cause it to be less effective,116 such as human limitations of consistency, strength, and duration.117 Therefore, mechanical depression devices have been designed to provide more effective means of delivering CPR. LUCAS is a chest compression device that was in use since 2003 for treating patients with cardiac arrest.118 This study found that mechanical chest compressions with LUCAS (n=1300) had no significant effect on survival compared to manual CPR (n=1289) in patients with out-of-hospital cardiac arrest. Four-hour survival occurred for 23.6% of patients with mechanical CPR and 23.7% with manual CPR (risk difference, -0.05%, 95% CI, -3.3% to 3.2%; P>.99). This is a reversal of mechanical CPR in out-of-hospital cardiac arrest. | 2016. "The ability to achieve ROSC with mechanical devise was inferior to manual chest compression during resuscitation. The use of mechanical chest compression cannot be recommended as a replacement for manual CPR, but rather a supplemental treatment in an overall strategy for treating CA patients."119 | PubMed suggestion |
| 286 | Web-Based Alcohol Screening and Brief Intervention for University Students A Randomized Trial  Kypri et al. | Public health/Preventive medicine | 3/26/2014  JAMA | Alcohol consumption is common among young adults and college students. Unhealthy alcohol consumption can lead to adverse outcomes, and web-based alcohol screenings and brief intervention programs were therefore designed to promote healthy alcohol use. While these programs have not been implemented on a national scale in any country, they have been implemented on smaller, local scales. Several commercial programs are available for college students and many others have been tested in various academic settings.120-124 In this study, web-based alcohol screening and a brief intervention program (n=1437) did not lead to better alcohol consumption outcomes compared to screening only (n=1413) for students who screened positive for alcohol abuse. The intervention group did not drink less often compared to control (RR, 0.95; 99.17% CI, 0.88-1.03; P=.08) or less overall (RR, 0.95; 99.17% CI, 0.81-1.10; P.33) and academic problem scores were not lower (RR, 0.91; 99.17% CI, 0.76-1.08; P=.14). Effects on risks of binge drinking (OR, 0.84; 99.17% CI, 0.67-1.05; P=.04) and heavy drinking (OR, 0.77; 99.17% CI, 0.56-1.05; P = .03) were not statistically significant. This is a reversal of web-based screening plus brief interventions for reducing unhealthy alcohol use in university students. | None found | PubMed suggestion |
| 287 | Effect of PET Before Liver Resection on Surgical Management for Colorectal Adenocarcinoma Metastases A Randomized Clinical Trial  Moulton et al. | Oncology | 5/14/2014 | About 50% of people with colorectal cancer will develop liver metastases.125 126 Positron emission tomography (PET) and computed tomography (CT) as a combined procedure can detect occult metastases that are not detected during surgical treatment of colorectal cancer. Their use became common after several smaller studies were published.126-128 In this study, use of PET in combination with CT (n=263) did not lead to changes in surgical management in patients who had a resectable colorectal liver metastases when compared to patients who received no PET-CT (n=134). After a median follow-up of 36 months, survival rate did not differ between the two groups (hazard ratio, 0.86; 95% CI, 0.60-1.21; P = .38). This is a reversal of the addition of PET to CT before liver resection for colorectal adenocarcinomas. | None found | PET in combination with CT for liver resection in colorectal cancer |
| 288 | Effect of Physical Therapy on Pain and Function in Patients With Hip Osteoarthritis A Randomized Clinical Trial  Bennell et al. | Orthopedic | 5/21/2014  JAMA | Hip osteoarthritis is a common condition, and guideline-recommended treatment advocates the use of physiotherapy.129 Patients with hip osteoarthritis in this study who were treated with physical therapy (n=49) did not have improvements in pain or function, as compared to sham treatment (n=53). At week 13, mean difference in Visual Analog pain scores was 6.9 mm, favoring sham (95% CI, -3.9 to 17.7) and function scores were also similar and favoring sham treatment with a mean difference of 1.4 units (95% CI, -3.8 to 6.5). This is a reversal of physical therapy for reducing pain and improving functionality in patients with hip osteoarthritis. | None found | GoogleSchoolar - RCT cited MA |
| 289 | Effect of Endoscopic Sphincterotomy for Suspected Sphincter of Oddi Dysfunction on Pain-Related Disability Following Cholecystectomy The EPISOD Randomized Clinical Trial  Cotton et al. | Gastroenterology/Hepatology | 5/28/2014  JAMA | Sphincter of Oddi manometry is the gold standard for diagnosing sphincter of Oddi dysfunction and is commonly used to determine the etiology of pancreatitis in patients who have undergone endoscopic retrograde cholangiopancreatography (ERCP).130 131 Sphincterotomies are commonly used in sphincter of Oddi manometry to remove stones or to relieve scarring or spasms of the sphincter.132 133 In this study, patients with abdominal pain after cholecystectomy who had undergone sphincterotomy (n=141) had worse risk of pain compared to sham treatment (n=73). Success treatment (less than 6 days of disability due to pain in the prior 90 days with no narcotic use) occurred in 37% of patients in the sham group and 23% in the sphincterotomy group (adjusted risk difference, -15.6%; 95% CI, -28.0% to -3.3%; P=.01). This is a reversal of sphincterotomy for abdominal pain after cholecystectomy undergoing ERCP with manometry. | There is only one published Cochrane review on this topic and it is from 2001. It concluded that there was insufficient data to make a recommendation (2 studies were included in the review).134 There was one SR/MA of RCTs and observational studies that looked at this topic, but did not include this study in its review, even though the study was published 2 years before the SR/MA. It found that there was no improvement in pancreatitis with endoscopic sphincterotomy in patients who received endoscopic retrograde cholangiopancreatography and stent.135 | GoogleSchoolar - RCT cited MA |
| 290 | Effect of Postoperative Antibiotic Administration on Postoperative Infection Following Cholecystectomy for Acute Calculous Cholecystitis A Randomized Clinical Trial  Regimbeau et al. | Gastroenterology/Hepatology | 7/9/2014  JAMA | Antibiotics are often given to a patient after cholecystectomy surgery to prevent subsequent infections, but this treatment has not been thoroughly tested as to whether or not it is necessary.136 137 In this study of patients with mild or moderate calculous cholecystitis, the continuation of the antibiotic regimen, amoxicillin plus clavulanic acid, after surgery (n=207) did not lead to lower rates of post-operative infection, compared to no antibiotics post-surgery (n=207). At the 4-week follow-up visit, rates of infection were 17% for the no-treatment group and 15% for the antibiotic group (absolute difference, 1.93%; 95% CI, -8.98% to 5.12%). This is a reversal of antibiotic administration to prevent postoperative infection following a cholecystectomy. | None found | GoogleSchoolar - RCT cited MA |
| 291 | Effects of Hydroxychloroquine on Symptomatic Improvement in Primary Sjögren Syndrome The JOQUER Randomized Clinical Trial  Gottenberg et al. | Rheumatology | 7/16/2014  JAMA | Hydroxychloroquine and corticosteroids are commonly prescribed for patients with Sjögren Syndrome, but data on their efficacy are sparse and conflicting.138-141 In this trial, patients with Sjögren Syndrome treated with hydroxychloroquine (n=56) did not have improvements in eye dryness, pain, or fatigue, compared to patients who received placebo (n=64). Reduction of symptoms by 30% occurred in 17.9% of patients in the hydochloroquine group and 17.2% in the placebo group (OR, 1.01; 95% CI, 0.37-2.78; P=.98). This is a reversal of hydroxychloroquine for treating symptoms of primary Sjögren syndrome. | 2017. “This systematic review showed that there is no significant difference between HCQ [hydroxychloroquine] and placebo in the treatment of dry mouth and dry eye in pSS [primary Sjögren Syndrome.]”142 | PubMed suggestion |
| 292 | Brief Intervention for Problem Drug Use in Safety-Net Primary Care Settings A Randomized Clinical Trial  Roy-Byrne et al. | Public health/Preventive medicine | 8/6/2014  JAMA | Programs with screening, brief intervention, and treatment for drug dependency have been widely adopted in medical settings, even though evidence for their effectiveness has been limited.143 144 In this trial, there were no positive improvements in drug use in patients with drug use for patients who received a one-time brief intervention plus booster call (n=435) compared to usual care (n=433). Differences in mean days of drug use at 3 months postintervention were 11.87 for the treatment group and 9.84 for the control group (between group difference, β=0.89; 95% CI, -0.49 to 2.26). This is a reversal of one-time brief interventions with telephone booster in a primary care setting for drug use intervention. | None found | brief intervention for drug use (with our without "safety net”) |
| 293 | Screening and Brief Intervention for Drug Use in Primary Care The ASPIRE Randomized Clinical Trial  Saitz et al. | Public health/Preventive medicine | 8/6/2014  JAMA | Programs with screening, brief intervention, and treatment for drug dependency have been widely adopted in medical settings, even though evidence for their effectiveness has been limited.143 144 This study randomized primary care patients identified as drug users by screening to one of 3 groups: brief negotiated interviewing (BNI), motivational interviewing (MOTIV), and no brief intervention. Mean days of drug use over a 30-day period was 11 for the BNI group, 12 for MOTIV group, and 12 for control group (incidence RR, 1.05; 95% CI, 0.84-1.32; P = .81 for both comparisons vs no brief intervention). This is a reversal of brief interventions for drug use in the primary care setting. | None found |  |
| 294 | Acupuncture for Chronic Knee Pain A Randomized Clinical Trial  Hinman et al. | Orthopedic | 10/1/2014  JAMA | Chronic knee pain is common in older adults and as people age. Acupuncture is a popular complementary and alternative medicine treatment for treating pain145 and has been shown to be effective in one meta-analysis.146 In this trial, patients with chronic knee pain, >50 years of age, were randomized to needle acupuncture (n=70), laser acupuncture (n=71), sham acupuncture (n=70), and no acupuncture (n=71). At 12 weeks, neither needle nor laser acupuncture improved knee pain (mean difference; −0.4 units; 95% CI, −1.2 to 0.4, and −0.1; 95% CI, −0.9 to 0.7, respectively) or physical function (−1.7; 95% CI, −6.1 to 2.6, and 0.5; 95% CI, −3.4 to 4.4, respectively) compared with sham at 12 weeks.  This is a reversal of acupuncture for treating patients with chronic knee pain. | None found |  |
| 295 | Effect of Screening for Coronary Artery Disease Using CT Angiography on Mortality and Cardiac Events in High-Risk Patients With Diabetes The FACTOR-64 Randomized Clinical Trial  Muhlestein et al. | Endocrinology, Diabetes, and Metabolism | 12/3/2014  JAMA | People with diabetes have a high risk of developing severe coronary artery disease (CAD). CAD is the most common cause of death among patients with diabetes.147 Screening for CAD may help identify individuals at high risk of CAD who may benefit from management and treatment. Coronary computed tomography angiography (CCTA) was a common form of screening being used for CAD screening.148 However, in this trial, there were no differences in a composite of all-cause mortality, nonfatal myocardial infarction, or unstable angina requiring hospitalization between patients with diabetes who were screened using CCTA (n=395) and those who were not screened (n=504). At 4 years follow up, the composite outcome occurred in 6.2% from the CCTA group vs 7.6% from no treatment group (HR, 0.80; 95% CI, 0.49-1.32; P=.38). This is a reversal of using CCTA to screen for CAD in patients with diabetes. | 2017. “Current available data do not support screening [with CCTA] for coronary artery disease in patients with type 2 diabetes for preventing fatal events.”149 | GoogleSchoolar - RCT cited MA |
| 296 | Effect of Fenoldopam on Use of Renal Replacement Therapy Among Patients With Acute Kidney Injury After Cardiac Surgery A Randomized Clinical Trial  Bove et al. | Nephrology | 12/3/2014  JAMA | Acute kidney injury (AKI) is common after cardiac surgery and is an independent predictor of higher mortality among patients who received cardiac surgery.150 Fenoldopam is a therapy that has been used for treatment of AKI in this setting and is considered part of standard care.151 152 In this trial, fenoldopam (n=338) did not reduce the rate of renal replacement therapy compared to placebo (n=329) in patients with acute kidney injury after cardiac surgery. This study ended early for futility. Twenty percent of patients in the fenoldopam and 18% of patients in the placebo group received renal replacement therapy (P=.47). This is a reversal of fenoldopam for treating AKI after cardiac surgery. | 2015. “In this analysis, peri-operative treatment with fenoldopam was associated with a significant reduction in post-operative AKI but it had no impact on renal replacement therapy or hospital mortality.” 153 This review did not include the RCT. | GoogleSchoolar - RCT cited MA |
| 297 | Low-Dose Aspirin for Primary Prevention of Cardiovascular Events in Japanese Patients 60 Years or Older With Atherosclerotic Risk Factors A Randomized Clinical Trial  Ikeda et al. | Cardiovascular | 12/17/2014  JAMA | Based on several studies showing a beneficial effect of aspirin, the 2002 United States Preventive Services Task Force found "good" evidence that aspirin decreases coronary heart disease in high-risk adults.154 Other organizations, such as the American Diabetes Association, American Heart Association, and the European Society of Cardiology also recommend aspirin prophylaxis for certain high-risk groups.154 Recommendations by the Joint Research Committee for Cardiac Disease in Japan advises physicians to “consider the use of aspirin for those with risk factors”.155 Although aspirin use for preventing cardiovascular events is not widespread in Japan, US guidelines are often adapted in other countries without considering their appropriateness in non-US populations. This study on low-dose aspirin use in Japanese men, 60 years or older, found that, compared to no aspirin (n=7244), daily low-dose aspirin (n=7220) did not lead to lower rates of a composite of death from cardiovascular causes, nonfatal stroke, or nonfatal myocardial infarction (2.77% in aspirin group vs 2.96% in no-aspirin group; HR, 0.94; 95% CI, 0.77-1.15; P=.54). This is a reversal of low-dose aspirin for primary prevention of cardiovascular events in Japanese patients with atherosclerotic risk factors. | 2017. “Evidence for aspirin in primary prevention is heterogeneous and limited by rare events and few credible subgroup analyses… The beneficial effect of aspirin for the primary prevention of CVD is modest and occurs at doses of 100 mg or less per day.156 | GoogleSchoolar - RCT cited MA |
| 298 | Effect of Maintenance Tocolysis With Nifedipine in Threatened Preterm Labor on Perinatal Outcomes A Randomized Controlled Trial  Roos et al. | Obstetrics/Gynecology | 1/2/2013  JAMA | Preterm labor is relatively common occurrence that can result in high health care costs. Tocolytics are often used to prevent uterine contractions but none are recommended above any others, in general.157 Nifedipine is one such commonly used tocolytic agent.158 This paper showed that In patients with threatened preterm labor, treatment with nifedipine (n=201) did not result in a statistically significant reduction in adverse perinatal outcomes when compared with placebo (n=205). Twenty-four of 201 participants (11.9%) in the nifedipine group vs 28/205 (13.7%) in the placebo group experience a composite of perinatal death, chronic lung disease, neonatal sepsis, intraventricular hemorrhage >grade 2, periventricular leukomalacia >grade 1, or necrotizing enterocolitis (RR, 0.87; 95% CI, 0.53-1.45). This is a reversal of nifedipine for maintaining tocolysis in threatened preterm labor. | 2013. Cochrane review. “Based on the current available evidence, maintenance treatment with a calcium channel blocker after threatened preterm labour does not prevent preterm birth or improve maternal or infant outcomes.” 159 | PubMed suggestion |
| 299 | Effect of Corticosteroid Injection, Physiotherapy, or Both on Clinical Outcomes in Patients With Unilateral Lateral Epicondylalgia A Randomized Controlled Trial  Coombes et al. | Orthopedic | 2/6/2013  JAMA | Corticosteroid injection is a common treatment for patients with lateral epicondylalgia,160 but because of the high recurrence rates, alternative treatments, such as physiotherapy, are also used. A conservative treatment, consisting of physiotherapy, is the recommended for the management of this condition.161 In this randomized controlled trial, patients with unilateral lateral epicondylalgia were randomized to corticosteroid injection (n=43), corticosteroid injection plus physiotherapy (n=39), placebo injection (n=40), or placebo injection plus physiotherapy n=41). Corticosteroid injections had worse rates of complete recovery or much recovery at 83% compared to placebo at 96% (RR, 0.86; 99% CI, 0.75-0.99; P=.01) and greater 1-year recurrence (54% vs 12%; RR, 0.23; 99% CI, 0.10-0.51; P<.001). Physiotherapy rates of recovery were 91% vs 88% for no physiotherapy (RR, 1.04; 99% CI, 0.90-1.19; P=.56) and recurrence was also similar at 29% vs 38% (RR, 1.31; 99% Ci, 0.73-2.35; P=.25). This is a reversal of corticosteroid injection and physiotherapy for patients with unilateral lateral epicondylalgia. | 2015. “Pooled data from RCTs indicate a lack of intermediate- to long-term clinical benefit after nonsurgical treatment of lateral epicondylitis compared with observation only or placebo.” 162 | GoogleSchoolar - RCT cited MA |
| 300 | Effect of Early vs Late Tracheostomy Placement on Survival in Patients Receiving Mechanical Ventilation The TracMan Randomized Trial  Young et al. | Critical care | 5/22/2013  JAMA | Tracheostomies are commonly performed on patients who require prolonged ventilation. Tracheostomies appear to increase patient comfort and lead to faster time to weaning from mechanical ventilation.163 Survey data indicate that there are wide variations in time to tracheostomy – with 13% of respondents initiating tracheostomy within 2 days and a median time of 10 to 11 days.164 Retrospective data suggested that earlier tracheostomy led to faster recovery from mechanical ventilation, shorter hospital stay, and a reduction in hospital mortality. In this trial, earlier tracheostomy would lead to faster recovery from mechanical ventilation, but in this trial earlier tracheostomy (within 4 days, n=451)) did not lead to improvements in 30-day mortality compared to late tracheostomy (after 10 days if still indicated, n=448). All-cause mortality after 30 days was 30.8% for the early group and 31.5% in the late group (absolute RR, 0.7%; 95% CI, -5.4% to 6.7%; P=.89). This is a reversal of early tracheostomy for patients receiving mechanical ventilation. | 2014. “Among the patients requiring prolonged MV [mechanical ventilation], ET [early tracheostomy] showed no significant difference in clinical outcomes compared to that of the LT/PI [late tracheostomy/prolonged intubation] group.”165 | PubMed suggestion |
| 301 | Early Parenteral Nutrition in Critically Ill Patients With Short-term Relative Contraindications to Early Enteral Nutrition A Randomized Controlled Trial  Doig et al. | Critical care | 5/22/2013  JAMA | Parenteral nutrition (PN) can provide nutrition for critically ill patients who cannot receive nutrition enterally. However, the timing of when to begin PN has been debated. Guidelines such as the European Society for Clinical Nutrition and Metabolism recommend starting PN within 24 to 48 hours of ICU admission if enteral nutrition is contraindicatedr,166 167 rather than waiting at least a week, as recommended by the American Society for Parenteral and Enteral Nutrition .168 In this trial, early PN (n=678) did not improve 60-day mortality compared to standard care (n=680). Day-60 mortality was 22.8% for standard care vs 21.5% for early PN (risk difference, -1.26%; 95% CI, -6.6 to 4.1; P=.60). This is a reversal of early PN for critically ill patients with short-term relative contraindications to early enteral nutrition. | 2015. “Overall, this meta-analysis from RCTs indicates that provision of ePN [early parenteral nutrition] within 24-48 hours has no benefit on the survival rate in critically ill patients.” 169 | PubMed suggestion |
| 302 | Effect of Soy Protein Isolate Supplementation on Biochemical Recurrence of Prostate Cancer After Radical Prostatectomy A Randomized Trial  Bosland et al. | Oncology | 7/10/2013  JAMA | Observational studies have shown an association between high soy intake and low prevalence of prostate cancer.170 The belief that soy is protective in preventing prostate cancer seems biologically plausible in that soy foods contain isoflavones, which contain antioxidant and anticancer properties.171 Sales of soy increased from $300 million in 1992 to $4 billion in 2008.172 Several companies were marketing soy isoflavones to help prevent prostate and breast cancer.173 In this study, soy protein isolate supplements (n=78) did not reduce recurrence of prostate cancer compared to placebo (n=73) in patients after radical prostatectomy. The rate of biochemical recurrence of prostate cancer was 27.3% for participants in the treatment group and 29.5% in the placebo group (HR, 0.96; 95% CI, 0.53-1.72; P=.89). This is a reversal of soy protein isolate supplementation for preventing recurrence of prostate cancer after radical prostatectomy. | None found | "soy protein isolate" and prostate cancer |
| 303 | Menopausal Hormone Therapy and Health Outcomes During the Intervention and Extended Poststopping Phases of the Women’s Health Initiative Randomized Trials  Manson et al. | Obstetrics/Gynecology | 10/2/2013  JAMA | Postmenopausal hormone replacement therapy (HRT) was initially used in the 1940s as a way to delay age-related health outcomes, but in the 1970’s, studies began to emerge showing that the use of HRT, specifically unopposed estrogen, was associated with endometrial cancer. Progesterone was thought to oppose the effects of estrogen and mitigate the excess risk of cancer, so women began to take them again. By the 1990s, HRTs were the most commonly prescribed medications.174 The Women’s Health Initiative investigated the effects of HRT in postmenopausal women compared to placebo. This paper is an overview of the many health effects of HRT and found that there is a complex pattern of risks and benefits. The authors concluded that HRT is not an appropriate or recommended intervention for the prevention of chronic disease in postmenopausal women. | 2015. “The current evidence suggests that MHT [menopausal hormone therapy] does not affect the risk of death from all causes, cardiac death and death from stroke or cancer.”175 Another SR/MA (2016) did not find any cardiovascular benefit to hormone therapy.176 | GoogleSchoolar - RCT cited MA |
| 304 | Universal Glove and Gown Use and Acquisition of Antibiotic-Resistant Bacteria in the ICU A Randomized Trial  Harris et al. | Critical care | 10/16/2013  JAMA | The emergence of antibiotic-resistant bacteria has become a serious public health issue. To help prevent the spread of these organisms, policies recommending contact precautions (e.g. gloves and gowns) were made by the Centers for Disease Control and Prevention.177 In this trial, intensive care units (ICUs) were randomized to usual care of ICUs (n of ICUs=10) or a protocol where all health care workers are required to wear gloves and gowns for all patient contact (intervention ICUs; n of ICUs=10). There was no difference in the acquisition of methicillin-resistant *Staphylococcus aureus* or vancomycin-resistant *Enterococcus* between ICUs that had universal glove and gown use and those that did not (difference, −1.71 acquisitions per 1000 person-days, 95% CI, −6.15 to 2.73; P = .57). This is a reversal of requiring that all health care workers in ICUs wear gloves and gowns for all patient contact and when entering a patient room. | 2014. “Contact precautions did not significantly reduce the VRE acquisition rate.” 178 This review did not include the RCT. | gloves and gowns for antibiotic resistant bacteria in icu |
| 305 | Effect of Risk-Reduction Counseling With Rapid HIV Testing on Risk of Acquiring Sexually Transmitted Infections The AWARE Randomized Clinical Trial  Metsch et al. | Infectious | 10/23-30/2013  JAMA | In 1999, the CDC issued recommendations that encouraged counseling and screening to prevent human immunodeficiency virus (HIV) incidence and the impact of existing HIV.179 In 2006, these recommendations were changed, and the recommendation for counseling at the time of testing were relaxed,180 but some states still recommend counseling in addition to HIV testing.181 In the AWARE trial, rapid HIV testing with patient-centered risk-reduction counseling (n=2505) did not reduce the incidence of sexually transmitted disease (STD) among patients in STD clinics compared to receiving information with rapid testing (n=2507). Rate of STDs was 12.3% in the counseling group and 11.1% in the information-only group (adjusted RR, 1.12; 95% CI, 0.94=1.33). This is a reversal of implementing risk-reduction counseling compared to receiving information during rapid HIV testing. | None found | risk reduction counseling and sexually transmitted infections |
| 306 | Effects of Fluid Resuscitation With Colloids vs Crystalloids on Mortality in Critically Ill Patients Presenting With Hypovolemic Shock The CRISTAL Randomized Trial  Annane et al. | Critical care | 11/6/2013  JAMA | Colloid solutions, such as albumin, are widely used to increase interstitial fluid volume because of their ability to increase oncotic pressure within the interstitium, but they are more expensive than other options (e.g. hypertonic saline) and may not provide any additional benefits.182 In the CRISTAL trial, colloidal solutions (n=1414) given to patients with hypovolemic shock did not improve 28-day mortality, when compared to patients treated with crystalloid solutions (n=1443). Rate of death at 28 days was 25.4% in the colloids group vs 27.0% in the crystalloids group (RR, 0.96; 95% CI, 0.88-1.04; P=.26). This is a reversal of colloids for critically ill patients presenting with hypovolemic shock. | 2014. “The present meta-analysis did not demonstrate significant advantage of using albumin-containing fluids for resuscitation in patients with sepsis of any severity… crystalloids should be the first choice for fluid resuscitation in septic patients.” 183 | PubMed suggestion |
| 307 | Effect of Communication Skills Training for Residents and Nurse Practitioners on Quality of Communication With Patients With Serious Illness A Randomized Trial  Curtis et al. | Critical care | 12/4/2013  JAMA | Discussing end-of-life care can be an uncomfortable but sometimes unavoidable component of patient care. Good communication skills are necessary for health care providers in these types of circumstances. Several types of training are available for health care providers, including one by the American Medical Association.184 185 In this trial, training medical professionals in simulation-based communication skills (n=78) did not result in improved patient-reported of communication compared to usual education (n=116). Quality of communication questionnaire scores were similar for patients (difference, 0.4 points; 95% CI, -0.1 to 0.9; P=.15) and for families (difference, 0.1; 95% CI, -0.8 to 1.0; P=.81). This is a reversal of simulation-based communication training in place of usual education on end-of-life care for internal medicine and nurse practitioner trainees. | 2017. “Meta-analysis showed no effect on patient outcomes.“186 | GoogleSchoolar - RCT cited MA |
| 308 | Effect of Nortriptyline on Symptoms of Idiopathic Gastroparesis The NORIG Randomized Clinical Trial  Parkman et al. | Gastroenterology/Hepatology | 12/25/2013  JAMA | There are few used or approved drugs for increasing gastric emptying in gastroparesis, and administration of these drugs is limited due to serious adverse effects.187 Some symptoms of gastroparesis are due to neuropathic events and have led some to theorize that tricyclic antidepressants, a class of neuromodulating drugs, may be effective in treating the condition. Several organizations have recommended tricyclic antidepressants for the antiemetic treatment of gastroparesis.188 189 “In clinical practice, tricyclic antidepressants (TCAs) in low doses are used as neuromodulators for treatment of nausea, vomiting, and abdominal pain in patients with gastroparesis.”190 In this trial, nortriptyline (n=65), a tricyclic antidepressant, did not improve symptoms of gastroparesis compared to placebo (n=65). Decrease in baseline Gastroparesis Cardinal Symptom Index scores of at least 50% on 2 consecutive assessments was similar between the nortriptyline group (23%; 95% CI, 14%-35%) and placebo group (21%; 95% CI, 12%-34%; P=.86). This is a reversal of nortriptyline for treating symptoms of idiopathic gastroparesis. | None found | There was no SR/MA on this specific topic. |

1. Jaber S, Amraoui J, Lefrant J-Y, et al. Clinical practice and risk factors for immediate complications of endotracheal intubation in the intensive care unit: a prospective, multiple-center study. *Critical care medicine* 2006;34(9):2355-61.

2. Chemsian R, Bhananker S, Ramaiah R. Videolaryngoscopy. *International Journal of Critical Illness and Injury Science* 2014;4(1):35-41. doi: 10.4103/2229-5151.128011

3. Huang H-B, Peng J-M, Xu B, et al. Video laryngoscopy for endotracheal intubation of critically ill adults: a systemic review and meta-analysis. *Chest* 2017;152(3):510-17.

4. Canonica GW, Cox L, Pawankar R, et al. Sublingual immunotherapy: World Allergy Organization position paper 2013 update. *World Allergy Organization Journal* 2014;7(1):1.

5. Kristiansen M, Dhami S, Netuveli G, et al. Allergen immunotherapy for the prevention of allergy: A systematic review and meta‐analysis. *Pediatric Allergy and Immunology* 2017;28(1):18-29.

6. Yaffe K, Lui LY, Zmuda J, et al. Sex hormones and cognitive function in older men. *Journal of the American Geriatrics Society* 2002;50(4):707-12.

7. Cherrier MM, Asthana S, Plymate S, et al. Testosterone supplementation improves spatial and verbal memory in healthy older men. *Neurology* 2001;57(1):80-88.

8. Margo K, Winn R. Testosterone treatments: why, when, and how? *American family physician* 2006;73(9)

9. Bolliger D, Szlam F, Molinaro R, et al. Finding the optimal concentration range for fibrinogen replacement after severe haemodilution: an in vitro model. *British journal of anaesthesia* 2009;102(6):793-99.

10. Solomon C, Pichlmaier U, Schoechl H, et al. Recovery of fibrinogen after administration of fibrinogen concentrate to patients with severe bleeding after cardiopulmonary bypass surgery. *British journal of anaesthesia* 2010;104(5):555-62.

11. Fominskiy E, Nepomniashchikh VA, Lomivorotov VV, et al. Efficacy and safety of fibrinogen concentrate in surgical patients: a meta-analysis of randomized controlled trials. *Journal of cardiothoracic and vascular anesthesia* 2016;30(5):1196-204.

12. Naylor J, Harmer A, Fransen M, et al. Status of physiotherapy rehabilitation after total knee replacement in Australia. *Physiotherapy research international* 2006;11(1):35-47.

13. Pezzin LE, Roberts BA, Miao H, et al. Regulatory policies, the" 75% rule," and post-acute care discharge setting. *American journal of physical medicine & rehabilitation* 2011;90(11):954-58.

14. Li D, Yang Z, Kang P, et al. Home-Based Compared with Hospital-Based Rehabilitation Program for Patients Undergoing Total Knee Arthroplasty for Osteoarthritis: A Systematic Review and Meta-analysis of Randomized Controlled Trials. *American journal of physical medicine & rehabilitation* 2017;96(6):440-47.

15. INDIANA DEPARTMENT OF ENVIRONMENTAL MANAGEMENT: Integrated Pest Management OoCS. IDEM Fact Sheet, 2010.

16. Action MBaLSaHRi. The Role of Pest Control in Effective Asthma Management:

A Business Case. In: Commission eARCoNEftBPH, ed., 2009.

17. Brozek G, Lawson J, Szumilas D, et al. Increasing prevalence of asthma, respiratory symptoms, and allergic diseases: Four repeated surveys from 1993-2014. *Respiratory medicine* 2015;109(8):982-90.

18. Short J. Use of dexmedetomidine for primary sedation in a general intensive care unit. *Critical care nurse* 2010;30(1):29-38.

19. Jüni P, Hari R, Rutjes AW, et al. Intra‐articular corticosteroid for knee osteoarthritis. *The Cochrane Library* 2015

20. Jüni P, Hari R, Rutjes AWS, et al. Intra-articular corticosteroid for knee osteoarthritis. *Cochrane Database of Systematic Reviews* 2015(10) doi: 10.1002/14651858.CD005328.pub3

21. Group SoUNW. Standardization of uveitis nomenclature for reporting clinical data. Results of the First International Workshop. *American journal of ophthalmology* 2005;140(3):509-16.

22. Callanan DG, Jaffe GJ, Martin DF, et al. Treatment of posterior uveitis with a fluocinolone acetonide implant: three-year clinical trial results. *Archives of ophthalmology (Chicago, Ill: 1960)* 2008;126(9):1191-201.

23. Legro RS, Brzyski RG, Diamond MP, et al. Letrozole versus clomiphene for infertility in the polycystic ovary syndrome. *New England Journal of Medicine* 2014;371(2):119-29.

24. Smith JF, Eisenberg ML, Millstein SG, et al. The use of complementary and alternative fertility treatment in couples seeking fertility care: data from a prospective cohort in the United States. *Fertility and sterility* 2010;93(7):2169-74.

25. Kollmann M, Martins W, Lima M, et al. Strategies for improving outcome of assisted reproduction in women with polycystic ovary syndrome: systematic review and meta‐analysis. *Ultrasound in Obstetrics & Gynecology* 2016;48(6):709-18.

26. Hartrick C. Evidence-Based Interventional Pain Practice: According to Clinical Diagnoses: John Wiley & Sons 2011.

27. Poetscher AW, Gentil AF, Lenza M, et al. Radiofrequency denervation for facet joint low back pain: a systematic review. *Spine* 2014;39(14):E842-E49.

28. Cattran DC, Feehally J, Cook HT, et al. Kidney disease: improving global outcomes (KDIGO) glomerulonephritis work group. KDIGO clinical practice guideline for glomerulonephritis. *Kidney International Supplements* 2012;2(2):139-274.

29. Vecchio M, Bonerba B, Palmer SC, et al. Immunosuppressive agents for treating IgA nephropathy. *The Cochrane Library* 2015

30. Lapergue B, Blanc R, Guedin P, et al. A direct aspiration, first pass technique (ADAPT) versus stent retrievers for acute stroke therapy: an observational comparative study. *American Journal of Neuroradiology* 2016;37(10):1860-65.

31. Saber H, Rajah GB, Kherallah RY, et al. Comparison of the efficacy and safety of thrombectomy devices in acute stroke: a network meta-analysis of randomized trials. *Journal of neurointerventional surgery* 2017:neurintsurg-2017-013544.

32. Banbury MK, Kouchoukos NT, Allen KB, et al. Emboli capture using the Embol-X intraaortic filter in cardiac surgery: a multicentered randomized trial of 1,289 patients. *The Annals of thoracic surgery* 2003;76(2):508-15.

33. Giustino G, Mehran R, Veltkamp R, et al. Neurological outcomes with embolic protection devices in patients undergoing transcatheter aortic valve replacement: a systematic review and meta-analysis of randomized controlled trials. *JACC: Cardiovascular Interventions* 2016;9(20):2124-33.

34. Landoni G, Bove T, Crivellari M, et al. Acute renal failure after isolated CABG surgery: six years of experience. *Minerva anestesiologica* 2007;73(11):559-65. [published Online First: 2007/10/24]

35. Egan JR, Clarke AJ, Williams S, et al. Levosimendan for low cardiac output: a pediatric experience. *Journal of intensive care medicine* 2006;21(3):183-87.

36. Kolseth SM, Nordhaug DO, Stenseth R, et al. Prophylactic treatment with levosimendan: a retrospective matched-control study of patients with reduced left ventricular function. *European Journal of Cardio-Thoracic Surgery* 2009;36(6):1024-30. doi: 10.1016/j.ejcts.2009.05.001

37. Putzu A, Clivio S, Belletti A, et al. Perioperative levosimendan in cardiac surgery: A systematic review with meta-analysis and trial sequential analysis. *International journal of cardiology* 2018;251:22-31.

38. Fonarow GC, Albert NM, Curtis AB, et al. Improving evidence-based care for heart failure in outpatient cardiology practices: primary results of the Registry to Improve the Use of Evidence-Based Heart Failure Therapies in the Outpatient Setting (IMPROVE HF). *Circulation* 2010;122(6):585-96.

39. Porapakkham P, Porapakkham P, Zimmet H, et al. B-type natriuretic peptide–guided heart failure therapy: a meta-analysis. *Archives of Internal Medicine* 2010;170(6):507-14.

40. Masson S, Latini R, Anand IS, et al. Prognostic value of changes in N-terminal pro-brain natriuretic peptide in Val-HeFT (Valsartan Heart Failure Trial). *Journal of the American College of Cardiology* 2008;52(12):997-1003.

41. Yancy CW, Jessup M, Bozkurt B, et al. 2013 ACCF/AHA guideline for the management of heart failure: executive summary. *Circulation* 2013;128(16):1810-52.

42. Giuliano AE, Jones RC, Brennan M, et al. Sentinel lymphadenectomy in breast cancer. *Journal of Clinical Oncology* 1997;15(6):2345-50.

43. Lucci A, McCall LM, Beitsch PD, et al. Surgical complications associated with sentinel lymph node dissection (SLND) plus axillary lymph node dissection compared with SLND alone in the American College of Surgeons Oncology Group Trial Z0011. *Journal of Clinical Oncology* 2007;25(24):3657-63.

44. Veronesi U, Paganelli G, Viale G, et al. A randomized comparison of sentinel-node biopsy with routine axillary dissection in breast cancer. *New England Journal of Medicine* 2003;349(6):546-53.

45. Rescigno J, Zampell JC, Axelrod D. Patterns of axillary surgical care for breast cancer in the era of sentinel lymph node biopsy. *Annals of surgical oncology* 2009;16(3):687-96.

46. Joyce D, Manning A, Carter M, et al. Meta-analysis to determine the clinical impact of axillary lymph node dissection in the treatment of invasive breast cancer. *Breast cancer research and treatment* 2015;153(2):235-40.

47. Adams HP, Del Zoppo G, Alberts MJ, et al. Guidelines for the early management of adults with ischemic stroke. *Circulation* 2007;115(20):e478-e534.

48. Rønning OM, Guldvog B. Should stroke victims routinely receive supplemental oxygen? *Stroke* 1999;30(10):2033-37.

49. Kaukonen K, Bailey M, Suzuki S, et al. Mortality related to severe sepsis and septic shock among critically ill patients in australia and new zealand, 2000-2012. *JAMA* 2014;311(13):1308-16. doi: 10.1001/jama.2014.2637

50. Rivers E, Nguyen B, Havstad S, et al. Early Goal-Directed Therapy in the Treatment of Severe Sepsis and Septic Shock. *New England Journal of Medicine* 2001;345(19):1368-77. doi: 10.1056/NEJMoa010307

51. Gauer RL. Early recognition and management of sepsis in adults: the first six hours. *American family physician* 2013;88(1)

52. Andrews B, Muchemwa L, Kelly P, et al. Simplified severe sepsis protocol: a randomized controlled trial of modified early goal-directed therapy in Zambia. *Crit Care Med* 2014;42(11):2315-24. doi: 10.1097/ccm.0000000000000541 [published Online First: 2014/07/30]

53. Jacob ST, Banura P, Baeten JM, et al. The impact of early monitored management on survival in hospitalized adult Ugandan patients with severe sepsis: a prospective intervention study. *Critical care medicine* 2012;40(7):2050.

54. Maitland K, Kiguli S, Opoka RO, et al. Mortality after fluid bolus in African children with severe infection. *New England Journal of Medicine* 2011;364(26):2483-95.

55. Angus D, Barnato A, Bell D, et al. A systematic review and meta-analysis of early goal-directed therapy for septic shock: the ARISE, ProCESS and ProMISe Investigators. *Intensive care medicine* 2015;41(9):1549-60.

56. Brower R, Lanken P, MacIntyre N, et al. National Heart, Lung, and Blood Institute ARDS Clinical Trials Network: Higher versus lower positive end-expiratory pressures in patients with the acute respiratory distress syndrome. *N Engl J Med* 2004;351(4):327-36.

57. Meade MO, Cook DJ, Guyatt GH, et al. Ventilation strategy using low tidal volumes, recruitment maneuvers, and high positive end-expiratory pressure for acute lung injury and acute respiratory distress syndrome: a randomized controlled trial. *Jama* 2008;299(6):637-45.

58. Briel M, Meade M, Mercat A, et al. Higher vs lower positive end-expiratory pressure in patients with acute lung injury and acute respiratory distress syndrome: systematic review and meta-analysis. *Jama* 2010;303(9):865-73.

59. Mercat A, Richard J-CM, Vielle B, et al. Positive end-expiratory pressure setting in adults with acute lung injury and acute respiratory distress syndrome: a randomized controlled trial. *Jama* 2008;299(6):646-55.

60. Zaky A, Lang JD. The use of intraoperative positive end expiratory pressure. *J Anesthe Clinic Res* 2011;4(308):2.

61. Walkey AJ, Del Sorbo L, Hodgson CL, et al. Higher PEEP versus Lower PEEP Strategies for Patients with Acute Respiratory Distress Syndrome. A Systematic Review and Meta-Analysis. *Annals of the American Thoracic Society* 2017;14(Supplement 4):S297-S303.

62. Baik SH. Robotic colorectal surgery. *Yonsei medical journal* 2008;49(6):891-96.

63. Panteleimonitis S, Parvaiz A. Robotic colorectal surgery. *Surgery (Oxford)* 2017

64. Kyriacou DN. Opioid vs Nonopioid Acute Pain Management in the Emergency Department. *Jama* 2017;318(17):1655-56.

65. Derry CJ, Derry S, Moore R. Single dose oral ibuprofen plus paracetamol (acetaminophen) for acute postoperative pain. *The Cochrane database of systematic reviews* 2012;6

66. Hedayati SS, Minhajuddin AT, Toto RD, et al. Prevalence of Major Depressive Episode in CKD. *American Journal of Kidney Diseases* 2009;54(3):424-32. doi: 10.1053/j.ajkd.2009.03.017

67. Unruh M. Chronic Kidney Disease: Depression in Chronic Kidney Disease: Renal&Urology News; 2013 [Available from: <http://www.renalandurologynews.com/nephrology-hypertension/chronic-kidney-disease-depression-in-chronic-kidney-disease/article/616028/> accessed 01/23/2018.

68. Hedayati SS, Yalamanchili V, Finkelstein FO. A practical approach to the treatment of depression in patients with chronic kidney disease and end-stage renal disease. *Kidney international* 2012;81(3):247-55.

69. DuBose J, Teixeira PG, Inaba K, et al. Measurable outcomes of quality improvement using a daily quality rounds checklist: one-year analysis in a trauma intensive care unit with sustained ventilator-associated pneumonia reduction. *Journal of Trauma and Acute Care Surgery* 2010;69(4):855-60.

70. Russ S, Rout S, Sevdalis N, et al. Do safety checklists improve teamwork and communication in the operating room? A systematic review. *Annals of surgery* 2013;258(6):856-71.

71. Weiss CH, Moazed F, McEvoy CA, et al. Prompting physicians to address a daily checklist and process of care and clinical outcomes: a single-site study. *American Journal of Respiratory and CriticalCare Medicine* 2011;184(6):680.

72. Krzyzanowska MK, Weeks JC, Earle CC. Treatment of locally advanced pancreatic cancer in the real world: population-based practices and effectiveness. *Journal of clinical oncology* 2003;21(18):3409-14.

73. Seufferlein T, Bachet JB, Van Cutsem E, et al. Pancreatic adenocarcinoma: ESMO–ESDO Clinical Practice Guidelines for diagnosis, treatment and follow-up†. *Annals of Oncology* 2012;23(suppl_7):vii33-vii40. doi: 10.1093/annonc/mds224

74. Xu C, Xue X, Liang N, et al. Effect of chemoradiotherapy and neoadjuvant chemoradiotherapy in resectable pancreatic cancer: a systematic review and meta-analysis. *Journal of cancer research and clinical oncology* 2014;140(4):549-59.

75. Hare DL, Toukhsati SR, Johansson P, et al. Depression and cardiovascular disease: a clinical review. *European heart journal* 2013;35(21):1365-72.

76. Sullivan M, Simon G, Spertus J, et al. Depression-related costs in heart failure care. *Archives of internal medicine* 2002;162(16):1860-66.

77. Glassman AH, O'connor CM, Califf RM, et al. Sertraline treatment of major depression in patients with acute MI or unstable angina. *Jama* 2002;288(6):701-09.

78. Azoulay E, Pochard F, Kentish-Barnes N, et al. Risk of post-traumatic stress symptoms in family members of intensive care unit patients. *American journal of respiratory and critical care medicine* 2005;171(9):987-94.

79. Nelson JE, Kinjo K, Meier DE, et al. When critical illness becomes chronic: informational needs of patients and families. *Journal of critical care* 2005;20(1):79-89.

80. Curtis JR, Treece PD, Nielsen EL, et al. Randomized trial of communication facilitators to reduce family distress and intensity of end-of-life care. *American journal of respiratory and critical care medicine* 2016;193(2):154-62.

81. Lautrette A, Darmon M, Megarbane B, et al. A communication strategy and brochure for relatives of patients dying in the ICU. *New England Journal of Medicine* 2007;356(5):469-78.

82. Lanken PN, Terry PB, DeLisser HM, et al. An official American Thoracic Society clinical policy statement: palliative care for patients with respiratory diseases and critical illnesses. *American journal of respiratory and critical care medicine* 2008;177(8):912-27.

83. Cahill PJ, Lobb EA, Sanderson C, et al. What is the evidence for conducting palliative care family meetings? A systematic review. *Palliative medicine* 2017;31(3):197-211.

84. Koester KA, Morewitz M, Pearson C, et al. Patient navigation facilitates medical and social services engagement among HIV-infected individuals leaving jail and returning to the community. *AIDS patient care and STDs* 2014;28(2):82-90.

85. Giuffrida A, Torgerson DJ. Should we pay the patient? Review of financial incentives to enhance patient compliance. *Bmj* 1997;315(7110):703-07.

86. Chang EL, Wefel JS, Hess KR, et al. Neurocognition in patients with brain metastases treated with radiosurgery or radiosurgery plus whole-brain irradiation: a randomised controlled trial. *The lancet oncology* 2009;10(11):1037-44.

87. Kocher M, Soffietti R, Abacioglu U, et al. Adjuvant whole-brain radiotherapy versus observation after radiosurgery or surgical resection of one to three cerebral metastases: results of the EORTC 22952-26001 study. *Journal of Clinical Oncology* 2010;29(2):134-41.

88. Khan M, Lin J, Liao G, et al. Comparison of WBRT alone, SRS alone, and their combination in the treatment of one or more brain metastases: Review and meta-analysis. *Tumor Biology* 2017;39(7):1010428317702903.

89. Pau H, Carney A, Walker R, et al. Is oestrogen therapy justified in the treatment of hereditary haemorrhagic telangiectasia: a biochemical evaluation. *Clinical Otolaryngology* 2000;25(6):547-50.

90. McDonald J, Bayrak-Toydemir P, Pyeritz RE. Hereditary hemorrhagic telangiectasia: an overview of diagnosis, management, and pathogenesis. *Genetics in medicine* 2011;13(7):607.

91. Piwek L, Ellis DA, Andrews S, et al. The rise of consumer health wearables: promises and barriers. *PLoS Medicine* 2016;13(2):e1001953.

92. Stephenson A, McDonough SM, Murphy MH, et al. Using computer, mobile and wearable technology enhanced interventions to reduce sedentary behaviour: a systematic review and meta-analysis. *International Journal of Behavioral Nutrition and Physical Activity* 2017;14(1):105.

93. Karki S, Cheng A. Impact of non-rinse skin cleansing with chlorhexidine gluconate on prevention of healthcare-associated infections and colonization with multi-resistant organisms: a systematic review. *Journal of Hospital Infection* 2012;82(2):71-84.

94. CADTH Rapid Response Reports. Chlorhexidine Gluconate Wipes for Infection Prevention in Acute and Critical Care: A Review of Clinical Effectiveness and Cost-Effectiveness. Ottawa (ON): Canadian Agency for Drugs and Technologies in Health

Copyright (c) 2016 Canadian Agency for Drugs and Technologies in Health. 2016.

95. Kiecolt-Glaser JK, Page GG, Marucha PT, et al. Psychological influences on surgical recovery: perspectives from psychoneuroimmunology. *American Psychologist* 1998;53(11):1209.

96. Sjöling M, Nordahl G, Olofsson N, et al. The impact of preoperative information on state anxiety, postoperative pain and satisfaction with pain management. *Patient education and counseling* 2003;51(2):169-76.

97. Handoll H, Brealey S, Rangan A, et al. Protocol for the ProFHER (PROximal Fracture of the Humerus: Evaluation by Randomisation) trial: a pragmatic multi-centre randomised controlled trial of surgical versus non-surgical treatment for proximal fracture of the humerus in adults. *BMC musculoskeletal disorders* 2009;10(1):140.

98. Handoll H, Ollivere BJ, Rollins KE. Interventions for treating proximal humeral fractures in adults. *Cochrane Database Syst Rev* 2012;12

99. Athanasoulis CA, Kaufman JA, Halpern EF, et al. Inferior vena caval filters: review of a 26-year single-center clinical experience. *Radiology* 2000;216(1):54-66.

100. Stein PD, Kayali F, Olson RE. Twenty-one-year trends in the use of inferior vena cava filters. *Archives of internal medicine* 2004;164(14):1541-45.

101. Jiang J, Jiao Y, Zhang X. The short-term efficacy of vena cava filters for the prevention of pulmonary embolism in patients with venous thromboembolism receiving anticoagulation: Meta-analysis of randomized controlled trials. *Phlebology* 2017;32(9):620-27.

102. Nelson ME, Rejeski WJ, Blair SN, et al. Physical activity and public health in older adults: recommendation from the American College of Sports Medicine and the American Heart Association. *Circulation* 2007;116(9):1094.

103. de Souto Barreto P, Demougeot L, Vellas B, et al. Exercise training for preventing dementia, mild cognitive impairment, and clinically meaningful cognitive decline: a systematic review and meta-analysis. *The Journals of Gerontology: Series A* 2017:glx234.

104. The Omega wave: British Broadcastin Company; 2014 [Available from: <http://www.bbc.co.uk/science/humanbody/mind/articles/intelligenceandmemory/omega_three.shtml>.

105. Black A.

Brain health dramatically improved by intake of omega-3 fatty acids and fish oils 2006 [Available from: <https://www.naturalnews.com/016353_omega-3_fatty_acids_mental_health.html>.

106. Kane RL, Butler M, Fink HA, et al. Interventions to prevent age-related cognitive decline, mild cognitive impairment, and clinical alzheimer’s-type dementia. 2017

107. Lin CWC, Donkers NA, Refshauge KM, et al. Rehabilitation for ankle fractures in adults. *The Cochrane Library* 2012

108. Chou R, Qaseem A, Snow V, et al. Diagnosis and Treatment of Low Back Pain: A Joint Clinical Practice Guideline from the American College of Physicians and the American Pain SocietyDiagnosis and Treatment of Low Back Pain. *Annals of internal medicine* 2007;147(7):478-91.

109. Hawkey CJ. Stem cell transplantation for Crohn's disease. *Best Practice & Research Clinical Haematology* 2004;17(2):317-25.

110. Qiu X, Feng J-R, Chen L-P, et al. Efficacy and safety of autologous hematopoietic stem cell therapy for refractory Crohn's disease: A systematic review and meta-analysis. *Medicine* 2017;96(26)

111. Knot J, Moťovská Z. Therapeutic hypothermia after cardiac arrest—Part 1: Mechanism of action, techniques of cooling, and adverse events. *cor et vasa* 2012;54(4):e237-e42.

112. Nolan JP, Morley PT, Vanden Hoek TL, et al. Therapeutic hypothermia after cardiac arrest: an advisory statement by the advanced life support task force of the International Liaison Committee on Resuscitation. *Circulation* 2003;108(1):118-21. doi: 10.1161/01.cir.0000079019.02601.90 [published Online First: 2003/07/09]

113. 2005 American Heart Association Guidelines for Cardiopulmonary Resuscitation and Emergency Cardiovascular Care. *Circulation* 2005;112(24 Suppl):Iv1-203. doi: 10.1161/circulationaha.105.166550 [published Online First: 2005/11/30]

114. Busch M, Soreide E, Lossius HM, et al. Rapid implementation of therapeutic hypothermia in comatose out‐of‐hospital cardiac arrest survivors. *Acta anaesthesiologica Scandinavica* 2006;50(10):1277-83.

115. Arrich J, Holzer M, Havel C, et al. Pre‐hospital versus in‐hospital initiation of cooling for survival and neuroprotection after out‐of‐hospital cardiac arrest. *The Cochrane Library* 2016

116. Steen S, Liao Q, Pierre L, et al. The critical importance of minimal delay between chest compressions and subsequent defibrillation: a haemodynamic explanation. *Resuscitation* 2003;58(3):249-58. doi: <https://doi.org/10.1016/S0300-9572(03)00265-X>

117. Wik L, Kramer-Johansen J, Myklebust H, et al. Quality of cardiopulmonary resuscitation during out-of-hospital cardiac arrest. *Jama* 2005;293(3):299-304.

118. System LCC. About us [Available from: <http://www.lucas-cpr.com/en/about_us/about_us> accessed 04/12/2018.

119. Li H, Wang D, Yu Y, et al. Mechanical versus manual chest compressions for cardiac arrest: a systematic review and meta-analysis. *Scandinavian journal of trauma, resuscitation and emergency medicine* 2016;24(1):10.

120. Walters ST, Miller E, Chiauzzi E. Wired for wellness: e-Interventions for addressing college drinking. *Journal of substance abuse treatment* 2005;29(2):139-45.

121. Nelson TF, Naimi TS, Brewer RD, et al. The state sets the rate: the relationship among state-specific college binge drinking, state binge drinking rates, and selected state alcohol control policies. *American Journal of Public Health* 2005;95(3):441-46.

122. Kypri K, Hallett J, Howat P, et al. Randomized controlled trial of proactive web-based alcohol screening and brief intervention for university students. *Archives of internal medicine* 2009;169(16):1508-14.

123. Bewick BM, Trusler K, Barkham M, et al. The effectiveness of web-based interventions designed to decrease alcohol consumption—a systematic review. *Preventive medicine* 2008;47(1):17-26.

124. Elliott JC, Carey KB, Bolles JR. Computer-based interventions for college drinking: a qualitative review. *Addictive behaviors* 2008;33(8):994-1005.

125. Fedorowicz Z, Lodge M, Al‐asfoor A, et al. Resection versus no intervention or other surgical interventions for colorectal cancer liver metastases. *The Cochrane Library* 2008

126. Arulampalam T, Francis D, Visvikis D, et al. FDG-PET for the pre-operative evaluation of colorectal liver metastases. *European Journal of Surgical Oncology (EJSO)* 2004;30(3):286-91.

127. Kantorová I, Lipská L, Bêlohlávek O, et al. Routine 18F-FDG PET preoperative staging of colorectal cancer: comparison with conventional staging and its impact on treatment decision making. *Journal of Nuclear Medicine* 2003;44(11):1784-88.

128. Desai DC, Zervos EE, Arnold MW, et al. Positron emission tomography affects surgical management in recurrent colorectal cancer patients. *Annals of surgical oncology* 2003;10(1):59-64.

129. Zhang W, Nuki G, Moskowitz R, et al. OARSI recommendations for the management of hip and knee osteoarthritis: part III: Changes in evidence following systematic cumulative update of research published through January 2009. *Osteoarthritis and Cartilage* 2010;18(4):476-99.

130. Cheon YK. How to Interpret a Functional or Motility Test-Sphincter of Oddi Manometry. *Journal of neurogastroenterology and motility* 2012;18(2):211.

131. Coyle WJ, Pineau B, Tarnasky P, et al. Evaluation of unexplained acute and acute recurrent pancreatitis using endoscopic retrograde cholangiopancreatography, sphincter of Oddi manometry and endoscopic ultrasound. *Endoscopy* 2002;34(08):617-23.

132. disorders Ifffg. Sphincter of Oddi Dysfunction 2016 [Available from: <https://www.iffgd.org/upper-gi-disorders/sphincter-of-oddi-dysfunction.html> accessed 1/24/2018.

133. Geenen J, Toouli J, Hogan W, et al. Endoscopic sphincterotomy: follow-up evaluation of effects on the sphincter of Oddi. *Gastroenterology* 1984;87(4):754-58.

134. Craig A, Toouli J. Sphincterotomy for biliary sphincter of Oddi dysfunction. *The Cochrane Library* 2001

135. Sofi AA, Nawras A, Alaradi OH, et al. Does endoscopic sphincterotomy reduce the risk of post‐endoscopic retrograde cholangiopancreatography pancreatitis after biliary stenting? A systematic review and meta‐analysis. *Digestive Endoscopy* 2016;28(4):394-404.

136. Kanafani ZA, Khalifé N, Kanj SS, et al. Antibiotic use in acute cholecystitis: practice patterns in the absence of evidence-based guidelines. *Journal of Infection* 2005;51(2):128-34.

137. Higgins A, London J, Charland S, et al. Prophylactic antibiotics for elective laparoscopic cholecystectomy: are they necessary? *Archives of Surgery* 1999;134(6):611-14.

138. Gottenberg J-E, Seror R, Miceli-Richard C, et al. Serum levels of beta2-microglobulin and free light chains of immunoglobulins are associated with systemic disease activity in primary Sjögren’s syndrome. Data at enrollment in the prospective ASSESS cohort. *PloS one* 2013;8(5):e59868.

139. Costedoat‐Chalumeau N, Amoura Z, Duhaut P, et al. Safety of hydroxychloroquine in pregnant patients with connective tissue diseases: A study of one hundred thirty‐three cases compared with a control group. *Arthritis & Rheumatology* 2003;48(11):3207-11.

140. Fox RI, Chan E, Benton L, et al. Treatment of primary Sjögren's syndrome with hydroxychloroquine. *The American journal of medicine* 1988;85(4):62-67.

141. Tishler M, Yaron I, Shirazi I, et al. Hydroxychloroquine treatment for primary Sjögren’s syndrome: its effect on salivary and serum inflammatory markers. *Annals of the Rheumatic Diseases* 1999;58(4):253-56.

142. Wang S-Q, Zhang L-W, Wei P, et al. Is hydroxychloroquine effective in treating primary Sjogren’s syndrome: a systematic review and meta-analysis. *BMC musculoskeletal disorders* 2017;18(1):186.

143. (SAMHSA) SAaMHSA. Screening, Brief Intervention, and Referral to Treatment (SBIRT) 2017 [Available from: <https://www.samhsa.gov/sbirt> accessed 1/24/2018.

144. Babor TF, McRee BG, Kassebaum PA, et al. Screening, Brief Intervention, and Referral to Treatment (SBIRT) toward a public health approach to the management of substance abuse. *Substance abuse* 2007;28(3):7-30.

145. Barnes PM, Bloom B, Nahin RL. Complementary and alternative medicine use among adults and children; United States, 2007. 2008

146. Vickers AJ, Cronin AM, Maschino AC, et al. Acupuncture for chronic pain: individual patient data meta-analysis. *Archives of internal medicine* 2012;172(19):1444-53.

147. Grundy SM, Benjamin IJ, Burke GL, et al. Diabetes and cardiovascular disease: a statement for healthcare professionals from the American Heart Association. *Circulation* 1999;100(10):1134-46. [published Online First: 1999/09/08]

148. Bax JJ, Young LH, Frye RL, et al. Screening for coronary artery disease in patients with diabetes. *Diabetes care* 2007;30(10):2729-36.

149. Rados DV, Pinto LC, Leitão CB, et al. Screening for coronary artery disease in patients with type 2 diabetes: a meta-analysis and trial sequential analysis. *BMJ open* 2017;7(5):e015089.

150. Chertow GM, Levy EM, Hammermeister KE, et al. Independent association between acute renal failure and mortality following cardiac surgery. *The American journal of medicine* 1998;104(4):343-48.

151. Rosner MH, Okusa MD. Acute kidney injury associated with cardiac surgery. *Clinical journal of the American Society of Nephrology* 2006;1(1):19-32.

152. Landoni G, Biondi-Zoccai GG, Tumlin JA, et al. Beneficial impact of fenoldopam in critically ill patients with or at risk for acute renal failure: a meta-analysis of randomized clinical trials. *American journal of kidney diseases* 2007;49(1):56-68.

153. Gillies MA, Kakar V, Parker RJ, et al. Fenoldopam to prevent acute kidney injury after major surgery—a systematic review and meta-analysis. *Critical Care* 2015;19(1):449.

154. Force UPST. Aspirin for the primary prevention of cardiovascular events: recommendation and rationale. *Annals of Internal Medicine* 2002;136(2):157.

155. Morimoto T, Fukui T, Lee TH, et al. Application of US guidelines in other countries: aspirin for the primary prevention of cardiovascular events in Japan. *The American journal of medicine* 2004;117(7):459-68.

156. Guirguis-Blake JM, Evans CV, Senger CA, et al. Aspirin for the primary prevention of cardiovascular events: A systematic evidence review for the u.s. preventive services task force. *Annals of Internal Medicine* 2016;164(12):804-13. doi: 10.7326/M15-2113

157. Conde-Agudelo A, Romero R, Kusanovic JP. NIFEDIPINE FOR THE MANAGEMENT OF PRETERM LABOR: A SYSTEMATIC REVIEW AND METAANALYSIS. *American journal of obstetrics and gynecology* 2011;204(2):134.e1-34.20. doi: 10.1016/j.ajog.2010.11.038

158. Goldenberg RL. The management of preterm labor. *Obstetrics & Gynecology* 2002;100(5):1020-37.

159. Naik Gaunekar N, Raman P, Bain E, et al. Maintenance therapy with calcium channel blockers for preventing preterm birth after threatened preterm labour. *The Cochrane Library* 2013

160. Tallia AF, Wood UR. Diagnostic and therapeutic injection of the elbow region. *Am Fam Physician* 2002;66:2097-100.

161. Stasinopoulos D, Johnson M. Physiotherapy and tennis elbow/lateral epicondylitis. *BMJ* 2004

162. Sayegh ET, Strauch RJ. Does nonsurgical treatment improve longitudinal outcomes of lateral epicondylitis over no treatment? A meta-analysis. *Clinical Orthopaedics and Related Research®* 2015;473(3):1093-107.

163. Freeman BD, Morris PE. Tracheostomy practice in adults with acute respiratory failure. *Critical care medicine* 2012;40(10):2890-96.

164. Howie J, Mackenzie S, MacKirdy F. Scottish Intensive Care Society Audit Group Annual Report 2002. 2002, 2013.

165. Huang H, Li Y, Ariani F, et al. Timing of tracheostomy in critically ill patients: a meta-analysis. *PloS one* 2014;9(3):e92981.

166. Doig GS, Simpson F, Finfer S, et al. Effect of evidence-based feeding guidelines on mortality of critically ill adults: a cluster randomized controlled trial. *Jama* 2008;300(23):2731-41.

167. Singer P, Berger MM, Van den Berghe G, et al. ESPEN guidelines on parenteral nutrition: intensive care. *Clinical nutrition* 2009;28(4):387-400.

168. McClave SA, Martindale RG, Vanek VW, et al. ASPEN Board of Directors; American College of Critical Care Medicine; Society of Critical Care Medicine. Guidelines for the provision and assessment of nutrition support therapy in the adult critically ill patient: Society of Critical Care Medicine (SCCM) and American Society for Parenteral and Enteral Nutrition (ASPEN). *JPEN J Parenter Enteral Nutr* 2009;33(3):277-316.

169. Wan X, Gao X-J, Tian F, et al. Early parenteral nutrition alone or accompanying enteral nutrition in critically ill patients: a systematic review and meta-analysis. *Asia Pacific journal of clinical nutrition* 2015;24(2):227-33.

170. Yan L, Spitznagel EL. Soy consumption and prostate cancer risk in men: a revisit of a meta-analysis–. *The American journal of clinical nutrition* 2009;89(4):1155-63.

171. Hussain M, Banerjee M, Sarkar FH, et al. Soy isoflavones in the treatment of prostate cancer. *Nutrition and cancer* 2003;47(2):111-17.

172. Konkel L. Could Eating Too Much Soy Be Bad for You? : Scientific American; 2009 [Available from: <https://www.scientificamerican.com/article/soybean-fertility-hormone-isoflavones-genistein/>.

173. Herbs or Natural Products That Protect Against Cancer Growth. Oncology nursing forum; 2004.

174. Brett KM, Madans JH. Use of postmenopausal hormone replacement therapy: estimates from a nationally representative cohort study. *American journal of epidemiology* 1997;145(6):536-45.

175. Benkhadra K, Mohammed K, Al Nofal A, et al. Menopausal hormone therapy and mortality: a systematic review and meta-analysis. *The Journal of Clinical Endocrinology & Metabolism* 2015;100(11):4021-28.

176. Mahmoodi BK, Cushman M, Næss IA, et al. Association of traditional cardiovascular risk factors with venous thromboembolism: an individual participant data meta-analysis of prospective studies. *Circulation* 2016:CIRCULATIONAHA. 116.024507.

177. Manian FA, Ponzillo JJ. Compliance with routine use of gowns by healthcare workers (HCWs) and non-HCW visitors on entry into the rooms of patients under contact precautions. *Infection Control & Hospital Epidemiology* 2007;28(3):337-40.

178. De Angelis G, Cataldo MA, De Waure C, et al. Infection control and prevention measures to reduce the spread of vancomycin-resistant enterococci in hospitalized patients: a systematic review and meta-analysis. *Journal of Antimicrobial Chemotherapy* 2014;69(5):1185-92.

179. Control CfD, Prevention. Revised guidelines for HIV counseling, testing, and referral. *MMWR Recommendations and reports: Morbidity and mortality weekly report Recommendations and reports* 2001;50(RR-19):1.

180. Branson BM, Handsfield HH, Lampe MA, et al. Revised recommendations for HIV testing of adults, adolescents, and pregnant women in health-care settings. *Morbidity and Mortality Weekly Report: Recommendations and Reports* 2006;55(14):1-CE-4.

181. Brown J. The changing landscape of state legislation and expanded HIV testing. *Public Health Reports* 2008;123(3_suppl):16-20.

182. Waikar SS, Chertow GM. Crystalloids versus colloids for resuscitation in shock. *Current opinion in nephrology and hypertension* 2000;9(5):501-4. [published Online First: 2000/09/16]

183. Jiang L, Jiang S, Zhang M, et al. Albumin versus Other Fluids for Fluid Resuscitation in Patients with Sepsis: A Meta-Analysis. *PLoS ONE* 2014;9(12):e114666. doi: 10.1371/journal.pone.0114666

184. Larson DG, Tobin DR. End-of-life conversations: evolving practice and theory. *Jama* 2000;284(12):1573-78.

185. Baile WF, Buckman R, Lenzi R, et al. SPIKES—a six-step protocol for delivering bad news: application to the patient with cancer. *The oncologist* 2000;5(4):302-11.

186. Selman LE, Brighton LJ, Hawkins A, et al. The effect of communication skills training for generalist palliative care providers on patient-reported outcomes and clinician behaviors: A systematic review and meta-analysis. *Journal of pain and symptom management* 2017;54(3):404-16. e5.

187. Parkman HP, Van Natta ML, Abell TL, et al. Effect of nortriptyline on symptoms of idiopathic gastroparesis: the NORIG randomized clinical trial. *Jama* 2013;310(24):2640-49.

188. Abell T, Bernstein VK, Cutts T, et al. Treatment of gastroparesis: a multidisciplinary clinical review. *Neurogastroenterology & Motility* 2006;18(4):263-83.

189. Gumaste V, Baum J. Treatment of gastroparesis: an update. *Digestion* 2008;78(4):173-79.

190. Parkman HP, Van Natta ML, Abell TL, et al. Effect of nortriptyline on symptoms of idiopathic gastroparesis: The norig randomized clinical trial. *JAMA* 2013;310(24):2640-49. doi: 10.1001/jama.2013.282833

| **#** | **Article and Author** | | **Primary Medical Discipline** | | **Date and Journal** | | **Summary** | | **Systematic Review** | | **Systematic Review Search Terms** | |
| --- | --- | --- | --- | --- | --- | --- | --- | --- | --- | --- | --- | --- |
| 82 | Effect of mammographic screening from age 40 years on breast cancer mortality at 10 years' follow-up: a randomized controlled trial Moss et al. | | Public health and general preventive medicine | | 12/9/2006  LANCET | | In the past, the American Cancer Society recommended that women between the ages of 40-49 get mammograms every 1-2 years.1 The benefit of mammograms for women under the age of 50 has not been established. 160 921 women aged 39-41 years old were randomly assigned in the ratio of 1:2 to an intervention group of annual mammography to age 48 or to a control group of usual medical care. At a mean follow-up of 10.7 years, there was no significant difference in breast cancer mortality between the intervention and control groups (relative risk 0.83 [95% CI 0.66-1.04], p=0.11). This is a reversal of the recommendation of mammographic screening every 1-2 years for women ages 40-49. | | 2013. Cochrane review. “The chance that a woman will benefit from attending screening is small at best, and - if based on the randomised trials - ten times smaller than the risk that she may experience serious harm in terms of overdiagnosis.”2 | | PubMed | |
| 83 | Magnesium sulphate for treatment of severe tetanus: a randomized controlled trial Thwaites et al. | | Clinical care medicine | | 10/21/2006  LANCET | | Tetanus, while rare in the developed world, is still common in other parts of the world, and has high mortality in those regions.3 Magnesium sulfate is sometimes used for this indication because it inhibits the release of catecholamines and is a neuromuscular relaxant.3 4 This study, conducted in Ho Chi Minh City, Vietnam, compared magnesium sulphate (n=97) to placebo (n=98) in treatment of patients with severe tetanus. They found no difference in need for mechanical ventilation between the two groups (odds ratio 0.71, [95% CI 0.36 – 1.40; p=0.324]), no difference in survival. The magnesium group, however, required less midazolam and pipecuronium to control muscle spasms. This is a reversal of the use of magnesium sulphate for treatment of severe tetanus. | | 2012. Anaesthetists of Great Britain and Ireland. “Magnesium sulphate did not reduce mortality, relative risk (95% CI): vs placebo, 0.80 (0.41–1.58); vs diazepam, 1.11 (0.70–1.75). The data on duration of total intensive care unit stay, total hospital stay and the need for ventilatory support were conflicting and pooling of results could not be done due to methodological differences of individual trials.”5 | | PubMed | |
| 84 | 30 day results from the SPACE trial of stent-protected angioplasty versus carotid endarterectomy in symptomatic patients: a randomized non-inferiority trial Ringleb et al. | | Cardiovascular disease | | 10/7/2006  LANCET | | Surgery is often recommended after ischemic events for patients with carotid stenosis.6 Carotid endarterectomy has often been used but carotid-artery stenting has been used with increasing frequency.7 The SPACE trial randomized 1200 patients within 180 days of transient ischemic attack or moderate stroke to either carotid-artery stenting (n=605) or carotid endarterectomy (n=595). This trial failed to show the non-inferiority of carotid-artery stenting compared to carotid endarterectomy in regards of death 30-day death rate (6.84% vs. 6.34%). This is a reversal of the use of carotid artery stenting for patients within 180 days of transient ischemic attack or moderate stroke. | | 2010. “Carotid endarterectomy was found to be superior to carotid artery stenting for short term outcomes  but the difference was not significant for intermediate term outcomes; this difference was mainly driven by nondisabling stroke.”8 | | stent-protected angioplasty, carotid endarterectomy | |
| 85 | Secondary prevention of asthma by the use of Inhaled Fluticasone propionate in Wheezy INfants (IFWIN): double-blind, randomized, controlled study Murray et al. | | Pulmonary disease | | 8/26/2006  LANCET | | Wheeze is common in young children, affecting up to half of children by the time they are six.9 Even though children often grow out of their wheeze, about one-third continue with wheezing and asthma symptoms later in life.10 Steroids are commonly used for this indication, and, specifically, fluticasone proprionate is recommended by the British National Formulary for adults with asthma.11 They followed 1073 children prospectively, of whom 333 were eligible, and 200 began treatment (101 in placebo group and 99 in treatment group). The groups did not differ significantly in proportion of children with current wheeze, physician-diagnosed asthma or use of asthma medication, lung function, or airway reactivity. This is a reversal of the use of inhaled fluticasone propionate for secondary prevention of asthma. | | No SR/MA specifically referencing the natural history of asthma | | Inhaled Fluticasone, asthma, long-term, later childhood | |
| 86 | Continuous venovenous hemodiafiltration versus intermittent hemodialysis for acute renal failure in patients with multiple-organ dysfunction syndrome: a multicenter randomized trial Vinsonneau et al. | | Nephrology | | 7/29/2006  LANCET | | Acute renal failure is a serious condition that has historically had high mortality, but because of dialysis, the mortality rate has decined.12 Both continuous renal replacement therapy and intermittent dialysis have been used, and while both have advantages and disadvantages, continuous venovenous hemodiafiltration is more intensive and costly.12 This study compared the two methods, using the same polymer membrane and bicarbonate-based buffer, and looked at 60-day survival. 360 patients were randomized to either continuous (n=184) or intermittent (n=176). They found the rate of 60-day survival did not differ between intermittent (32%) and continuous (33%). This is a reversal of the practice of continuous venous hemodiafiltration in patients with acute renal failure and multiple-organ dysfunction syndrome. | | 2007. Cochrane review. “We did not ﬁnd any difference between CRRT and IRRT with respect to mortality, renal recovery, and risk of haemodynamic instability or hypotension episodes.”13 | | PubMed | |
| 87 | Intrauterine insemination with controlled ovarian hyper stimulation versus expectant management for couples with unexplained subfertility and an intermediate prognosis: a randomized clinical trial Steures et al. | | Obstetrics and Gynecology | | 7/15/2006  LANCET | | Ovarian stimulation is used to treat infertility because it is thought that the multiple mature follicles with stimulation would lead to higher pregnancy rates. Follicle stimulating hormone and gonadotrophin-releasing hormone are often used in ovarian hyperstimulation, and several formulations were on the market at the time of this study.14 In this study, 253 couples were randomized to either intrauterine insemination with controlled ovarian hyperstimulation (n=127) for 6 months, or expectant managements (n=126) for 6 months. They found no significant difference in ongoing pregnancy at 6 months. 42 (33%) women in the intervention group conceived, and 29 (23%) were ongoing. 40 (32%) women in the expectant management group conceived, and 34 (27%) were ongoing. This is a reversal of the use of intrauterine insemination with controlled ovarian hyper stimulation for conception. | | 2016. Cochrane review. “However the trials provided insufficient data to investigate the impact of IUI with or without OH on several important outcomes including live births, multiple pregnancies, miscarriage and risk of ovarian hyperstimulation. There was no evidence of a difference in pregnancy rate for IUI with OH compared with timed intercourse in a natural cycle.”15 | | PubMed | |
| 88 | Aminophylline in bradyasystolic cardiac arrest: a randomized placebo-controlled trial Abu-Laban et al. | | Cardiovascular disease | | 5/13/2006  LANCET | | Aminophylline is an adenosine antagonist and stimulates the release of catecholamines.16 Interest in aminophylline in the treatment of bradyasystolic cardiac arrest began in the early 1990s after the publication of several anecdotal reports. Since then, aminophylline has been sporadically used, but was included in CPR guidelines.17 18 This study randomized 971 subjects with asystole or pulseless electrical activity at fewer than 60 beats per minute, and who were unresponsive to initial treatment with epinephrine and atropine, to receive intravenous aminophylline (250 mg, and additional 250 mg if necessary) (n=486) or placebo (n=485). They found that, while aminophylline increased non-sinus tachyarrhythmias (34.6% vs. 26.2%), there was no difference in patients who survived to hospital discharge in the aminophylline group (2, 0.5%) and the placebo group (3, 0.6%). This is a reversal of the use of aminophylline in bradyasystolic cardiac arrest. | | 2015. Cochrane review. “The prehospital administration of aminophylline in bradyasystolic arrest is not associated with improved return of circulation, survival to admission or survival to hospital discharge.”16 | | PubMed | |
| 89 | Effects of routine prophylactic supplementation with iron and folic acid on admission to hospital and mortality in preschool children in a high malaria transmission setting: community-based, randomised, placebo-controlled trial Sazawal et al. | | Public health and general preventive medicine | | 1/14/2006  Lancet | | Children are often at high risk of being iron deficient, and as such, the World Health Organization guidelines recommend iron supplementation for children 2-5 years old.19 However, in populations that are also at high risk of malaria, recommendations may need to be reconsidered, as iron deficiency may protect against malaria and malaria-related deaths.20 Children aged 1-35 months living in Pemba, Zanzibar were assigned to either daily oral supplementation with iron (12.5 mg) and folic acid (50 μg, n=7950), iron, folic acid and zinc (n=8120), or placebo (n=8006). The iron and folic acid containing groups were stopped early due to safety concerns. Those who received iron and folic acid with or without zinc were 12% (95% CI 1.02 to 1.23, p=0.02) more likely to experience an adverse event and 11% (1.01 to 1.23, p=0.03), more like to be admitted to the hospital, and no more likely to have reduced mortality (RR=1.15; 95% CI=0.93 to 1.41, p=0.19). This is a reversal of the practice of prophylactic iron and folic acid supplementation for reducing hospital admissions and mortality in preschool children in a high malaria transmission locale. | | 2016. Cochrane review. The review concluded that iron plus folic acid supplementation does not have any effect on mortality, and hospitalizations were no different, although this RCT was not included in the meta-analysis on hospitalization.21 | | PubMed | |
| 90 | Effect of BCG revaccination on incidence of tuberculosis in school-aged children in Brazil: the BCG-REVAC cluster-randomized trial Rodrigues et al. | | Pulmonary disease | | 10/8/2005  LANCET | | The Bacillus Calmette-Guerin (BCG) vaccine was developed as a prevention method for tuberculosis, a prevalent and sometimes serious bacterial infection. Revaccination for tuberculosis is common in European countries, where at least a dozen of them had a policy for revaccination for children 5-8 years of age and more had policies for people 10-15 years of age.22 BCG vaccination is common in Brazil, but revaccination varies from state to state. 386 schools (176 846 children) were assigned BCG revaccination and 365 (171 293) no revaccination. 42 053 in the vaccine group were absent in the vaccine group and 47006 in the control group. The crude incidence of tuberculosis in the intervention group was 29.3 per 100 000 person years, and 30.2 per 100 000 in the control group. The efficacy of BCG revaccination was 9% (95% CI -16 to 29%). This is a reversal of the policy of BCG revaccination for incidence of tuberculosis. | | None for revaccination | | BCG revaccination, tuberculosis, school-aged children, adolescents | |
| 91 | Assessment of the clinical effectiveness of pulmonary artery catheters in management of patients in intensive care (PAC-Man): a randomized controlled trial Harvey et al. | | Clinical care medicine | | 8/6/2005  LANCET | | The pulmonary artery catheter (PAC) was introduced 30 years ago, and it is widely used in critically ill patients, yet there has been no formal assessment of either its clinical effectiveness or cost-effectiveness23. Subjects in this study were identified by the treating physician as someone who should be managed using invasive hemodynamic monitoring, and randomized to management with (n=519) or without (n=522) a PAC. This study found no difference in hospital mortality between subjects with or without a PAC (68% [346 of 506] vs. 66% [333 of 507], p=0.39). This is a reversal of the routine use of PAC for patients in intensive care. | | 2013. Cochrane review. “Our review concluded that use of a PAC did not alter the mortality, general ICU or hospital LOS, or cost for adult patients in intensive care.”24 | | PubMed | |
| 92 | Combination antibiotic susceptibility testing to treat exacerbations of cystic fibrosis associated with multiresistant bacteria: a randomized, double-blind, controlled clinical trial Aaron et al. | | Pulmonary disease | | 8/6/2005  LANCET | | People with cystic fibrosis often have chronic respiratory infections due to their inability to clear pathogens from their lower respiratory tract.25 Chronic treatment of these infections can cause antibiotic resistance. Synergy testing or multiple-combination bactericidal testing has been implemented in several specialized laboratories to help optimize antibiotic therapy.26 In this RCT, 251 patients with cystic fibrosis who were chronically infected with multiresistant gram negative bacteria gave sputum at 3-month intervals for conventional culture and sensitivity tests for combination antibiotic susceptibility tests using multiple combination bactericidal antibiotic testing (MCBT). Patients who developed an exacerbation of pulmonary disease were randomized to receive a 14-day course of any two blinded antibiotics based on results from the conventional sputum culture and sensitivity testing (n=68) or results of MCBT (n=64). They found that the treatment based off combination antibiotic susceptibility testing did not lead to fewer pulmonary exacerbations or treatment failures, compared to standard culture and sensitivity results (hazard ratio 0.86 [95% CI 0.60–1.23], p=0.40). This is a reversal of the combination antibiotic susceptibility testing to treat exacerbations of cystic fibrosis. | | 2017. Cochrane review. “The current evidence, limited to one study, shows that there is insufficient evidence to determine effect of choosing antibiotics based on combination antimicrobial susceptibility testing compared to choosing antibiotics based on conventional antimicrobial susceptibility testing in the treatment of acute pulmonary exacerbations in people with cystic fibrosis with chronic Pseudomonas aeruginosa infection.” 27 | | PubMed | |
| 93 | Chloramphenicol treatment for acute infective conjunctivitis in children in primary care: a randomized double-blind placebo-controlled trial Rose et al. | | Pediatrics | | 7/2/2005  LANCET | | Conjunctivitis is a very common condition in children. About half of conjunctivitis cases are bacterial in nature and most will resolve in a few days without treatment.28 In a UK survey, 95% of physicians reported that they prescribed an antibiotic for acute conjunctivitis, with chloramphenicol being the commonest antibiotic prescribed for this indication.28 This study randomized 326 children aged 6 months to 12 years with a clinical diagnosis of conjunctivitis to receive chloramphenicol eye drops (n=163) or placebo (n=163). They found clinical cure by day 7 occurred in 128 (83%) of 155 children in the placebo compared to 140 (86%) of 162 with chloramphenicol (risk difference 3.8%, [95% CI −4.1% to 11.8%]). This is a reversal of the use of chloramphenicol for treatment of acute infective conjunctivitis. | | 2011. British Journal of General Practice. “Acute conjunctivitis seen in primary care can be thought of as a self-limiting condition, with most patients getting better regardless of antibiotic therapy.”29  2013: Jama: “The majority of cases in bacterial conjunctivitis are self-limiting and no treatment is necessary in uncomplicated cases. However, conjunctivitis caused by gonorrhea or chlamydia and conjunctivitis in contact lens wearers should be treated with antibiotics.” | | PubMed | |
| 94 | Endovascular aneurysm repair and outcome in patients unfit for open repair of abdominal aortic aneurysm (EVAR trial 2): randomized controlled trial EVAR Trial participants, Greenhalgh et al. | | Cardiovascular disease | | 6/25/2005  LANCET | | Abdominal aortic aneurysms are more common as people age, and larger aneurysms are more likely to rupture and lead to death.30 Surgery is often performed on larger aneurysms to prevent adverse outcomes, but because a number of people are not good candidates for traditional surgery, endovascular repair has been offered as an alternative.31 In the EVAR II trial, 338 patients aged 60 years or older who had aneurysms of at least 5.5 cm in diameter and who had been referred to one of 31 hospitals in the UK were assigned to receive either EVAR (n=166) or no intervention (n=172). By the end of follow up, they found no significant difference between the two groups in all-cause mortality (hazard ratio 1.21, [95% CI 0.87–1.69], p=0.25). This is a reversal of the use of EVAR in patients unfit for open repair of abdominal aortic aneurysms. | | 2014. Cochrane review. “In individuals considered unfit for open surgery, the results of a single trial found no overall short- or long-term benefits of EVAR over no intervention with regard to all-cause mortality, but individuals may differ and individual preferences should always be taken into account.”32 | | PubMed | |
| 95 | Endovascular aneurysm repair versus open repair in patients with abdominal aortic aneurysm (EVAR trial 1): randomized controlled trial EVAR Trial participants, Greenhalgh et al. | | Cardiovascular | | 6/25/2005  LANCET | | Abdominal aortic aneurysms are more common as people age, and larger aneurysms are more likely to rupture and lead to death.30 Surgery is often performed on larger aneurysms to prevent adverse outcomes, but because a good number of people are not good candidates for traditional surgery, endovascular repair has been offered as an alternative.31 In the EVAR I trial, 1082 patients aged 60 years or older who had aneurysms of at least 5.5 cm in diameter and who had been referred to one of 34 hospitals proficient in the EVAR technique were assigned to EVAR (n=543) or open repair (n=539). There was a reduction in aneurysm related deaths in the EVAR group (4% vs 7%, 0.55 [0.31-0.96], p=0.04), but all-cause mortality was similar in the two groups (hazard ratio 0.90, [95% CI 0.69-1.18], p=0.46). In addition, patients in the EVAR group had a higher proportion of postoperative complications within 4 years of randomization compare to the open group (41% vs 9%, 4.9 [3.5-6.8], p<0.0001). This is a reversal of the practice of endovascular aneurysm repair in patients with abdominal aortic aneurysm. | | 2014. Cochrane review. “In individuals considered ﬁt for conventional surgery, EVAR [endovascular aneurysm repair] was associated with lower short-term mortality than OSR [open surgical repair]. However, this beneﬁt from EVAR did not persist at the intermediate- and long-term follow ups. Individuals undergoing EVAR had a higher reintervention rate than those undergoing OSR.”32 | | PubMed | |
| 96 | Introduction of the medical emergency team (MET) system: a cluster-randomized controlled trial Hillman et al. | | Critical care medicine | | 6/18/2005  LANCET | | Medical emergency teams (METs) are trained medical professionals that respond quickly to a change in a patient’s condition based on the premise that early intervention may prevent further deterioration and/or death. A MET can help to manage cardiac arrests, and unplanned ICU admissions that sometimes occur in a hospital.33 Hospitals in both the UK and Australia have established these teams into their healthcare.34 35 In this trial, after two months of collecting baseline data, hospitals in Australia were randomized to receive MET implementation or control. While there was a significant increase in overall calling incidence for an emergency team (3.1 vs 8.7 per 1000 admissions, p=0.0001), there was no difference in the composite outcome of cardiac arrest, unexpected death, or unplanned intensive care unit admissions between control hospitals and MED hospitals (5.86 vs 5.31 per 1000 admissions, p=0.64). This is a reversal of the use of METs. | | 2010. “Although RRTs (Rapid Response Teams) have broad appeal, robust evidence to support their effectiveness in reducing hospital mortality is lacking.”36 | | Google Scholar | |
| 97 | Oral vitamin D3 and calcium for secondary prevention of low-trauma fractures in elderly people (Randomized Evaluation of Calcium Or vitamin D, RECORD): a randomized placebo-controlled trial Grant et al. | | Orthopedic | | 5/7/2005  LANCET | | Vitamin D and calcium are important nutrients for bone health and are part of dietary recommendations, and higher intakes of vitamin D is recommended for older adults who have a harder time synthesizing vitamin D from the sun.37 For older adults, the World Health Organization Task-Force for Osteoporosis has recommended that physicians provide vitamin D to people in climates where it would be "appropriate". Canadian guidelines recommend vitamin D supplements for older adults and calcium when dietary sources are inadequate.38 Physicians in Canada often prescribe vitamin D and/or calcium for long-term care patients with osteoporosis. 39 In the RECORD trial,5292 people aged 70 or older who were mobile before developing a low-trauma fracture were randomly assigned to 800 IU daily oral vitamin D3, 1000 mg calcium, oral vitamin D3 (800 IU per day) combined with calcium (1000 mg per day), or placebo. They found that the incidence of new, low-trauma fractures did not differ between those allocated to calcium or not (331 [12.6%] of 2617 vs 367 [13.7%] of 2675; hazard ratio (HR) 0.94 [95% CI 0.81–1.09]), those allocated to vitamin D3 or not (353 [13.3%] of 2649 vs 345 [13.1%] of 2643; 1.02 [0.88–1.19]) or those allocated to the combination or not(165 [12.6%] of 1306 vs 179 [13.4%] of 1332; HR for interaction term 1.01 [0.75–1.36]). This is a reversal of the use of vitamin D supplementation for prevention of fractures. | | 2014. Cochrane. “Vitamin D alone is unlikely to prevent fractures in the doses and formulations tested so far in older people. Supplements of vitamin D and calcium may prevent hip or any type of fracture.”40 | | PubMed | |
| 98 | Effects of N-acetylcysteine on outcomes in chronic obstructive pulmonary disease (Bronchitis Randomized on NAC Cost-Utility Study, BRONCUS): a randomized placebo-controlled trial Decramer et al. | | Pulmonary disease | | 4/30/2005  LANCET | | Chronic obstructive pulmonary disease (COPD) is an inflammatory condition, which may be helped with anti-inflammatory drugs, such as N-acetylcysteine (NAC).41 Mucolytics, specifically NAC have been widely prescribed in Europe, but less commonly prescribed in other parts of the world.42 In this trial, subjects with COPD were randomized to 600 mg/day of N-acetylcysteine or placebo. They were followed for three years and were measured yearly on their forced expiratory volume (FEV) and number of exacerbations per year. They found no significant difference between the NAC group and the placebo group in FEV (54 mL [SE 6] *vs* 47 mL [SE 6]) nor in number of exacerbations per year (1.25 [SD 1.35] *vs* 1.29 [SD 1.46]). This is a reversal of N- acetylcysteine in patients with COPD. | | 2015. Cochrane review. The reviewers found there to be a small decrease in monthly exacerbations in groups using mucolytics. However, there were only shown in smaller, older studies. Newer, larger trials have not shown the same significant decrease, causing doubt to be raised in their conclusion. 43 | | PubMed | |
| 99 | Effect of timing and method of enteral tube feeding for dysphagic stroke patients (FOOD): a multicenter randomized controlled trial Dennis et al. | | Neurology/Neurosurgery | | 2/26/2005  LANCET | | Malnutrition is common in patients who have had stroke because of eating problems and impaired functional capacity, which can then lead to a poorer prognosis for the patient.44 Percutaneous endoscopic gastrostomy (PEG) feeding has overcome the difficulty of feeding because food can be delivered directly to the stomach, but feeding practices vary, which has raised questions about what is ethically right to do.45 Surveys of feeding practice after stroke have recorded much variation between hospitals in the UK, in particular, when to start enteral tube feeding and whether a nasogastric or PEG tube is used. The FOOD trial consisted of three multicenter controlled trials, two of which included dysphagic stroke patients. In one trial, patients were randomized to either early enteral tube feeding, or no tube feeding for more than 7 days. In the other, patients were randomized to PEG or nasogastric feeding. In both trials, death or poor outcome at 6 months was the primary outcome. They found a non-significant reduction in death (5.8% [95% CI -0.8 – 12.5, p=0.09]) and death or poor outcome (1.2% [-4.2 – 6.6 p=0.7]) in the early vs late group. They also found a non-significant drop in death (1% [-10.0 – 11.9 p=0.9]) and increase of death or poor outcome (7.8 [0.0 – 15.5 p=0.05]) in PEG vs nasogastric feeding. Overall, the data does not support early initiation of PEG feeding in dysphagic stroke patients. | | None found | | PubMed | |
| 100 | Routine oral nutritional supplementation for stroke patients in hospital (FOOD): a multicenter randomized controlled trial Dennis et al. | | Neurology/Neurosurgery | | 2/26/2005  LANCET | | Undernutrition is common in patients with stroke in hospital settings and is associated with poor outcomes46. One method to combat undernutrition is through oral nutritional supplementation, a treatment offered in some hospitals without concrete evidence to support it. In the third of three randomized trials as a part of the FOOD trials, this measured the outcomes of stroke patients who could swallow. Patients were randomized to normal hospital diet, or normal diet plus nutritional supplements until discharge. Oral supplements were associated with a non-significant reduction in death (0.7% [95% CI -1.4 – 2.7]) and a non-significant risk of death or poor outcome (0.7% [-2.3 – 3.8]) compared to normal hospital diet. This is a reversal of the practice of routine oral nutritional supplementation for stroke patients. | | 2009. Cochrane review. “Supplementation produces a small but consistent weight gain in older people. Mortality may be reduced in older people who are undernourished. There may also be a beneﬁcial effect on complications which needs to be conﬁrmed. However, this updated review found no evidence of improvement in functional beneﬁt or reduction in length of hospital stay with supplements.”47 | | oral nutritional supplementation, stroke, feeding, adverse effects | |
| 101 | Early surgery versus initial conservative treatment in patients with spontaneous supratentorial intracerebral hematomas in the International Surgical Trial in Intracerebral Hemorrhage (STICH): a randomized trial Mendelow et al. | | Neurology/Neurosurgery | | 1/29/2005  LANCET | | Spontaneous supratentorial intracerebral hematomas have high rates of morbidity and mortality and the recommended treatment is controversial. While trials on neurosurgery versus conservative treatment have shown conflicting outcomes48 49, surgeons have been practicing early surgery in patients with these hematomas50. This study randomized 601 patients to either early surgery (n=307) or initial conservative treatment (n=294). 174/297 (59%) of the patients in the early surgery group had unfavorable outcomes compared to 178/286 (62%) of patients in the initial conservative treatment group (absolute difference 3.7% [95% CI −4.3 to 11.6], odds ratio 0.86 [0.62 to 1.20]; p=0.367). This is a reversal of the practice of routine early surgery in patients with spontaneous supratentorial intracerebral hematomas. | | 2008. Cochrane review. “A comment about the STICH trial is warranted because this is the largest study relevant to the review. Some neurosurgeons interpret the results of the STICH trial as negative and justify denying neurosurgery to all kinds of patients with primary supratentorial intracerebral haemorrhage. This is plainly inaccurate. Nearly a quarter of participants in the medical arm of the STICH trial had surgery, mainly because of their deteriorating clinical condition. A more rational interpretation of the STICH trial would be that there is no statistically significant difference in outcomes between the policy of surgery done early in all eligible patients and that of surgery done only in those who deteriorate. 51 | | PubMed | |
| 102 | The United Kingdom Infantile Spasms Study comparing vigabatrin with prednisolone or tetracosactide at 14 days: a multicenter, randomized controlled trial Lux et al. | | Pediatrics | | 11/13/2004  LANCET | | Infantile spasms are a type of seizure disorder, which is often treated with adrenocorticotropic hormones (ACTH), which can have potentially life-threatening side effects.52 Since 1958, the usual interventions have been hormonal treatments, with either intramuscular adrenocorticotropic hormone or oral corticosteroids. Vigabatrin was approved for use in Canada in 1995, and some physicians began using this as an option.53 This study compared three groups with either: vigabatrin 100 mg/kg per day, oral prednisolone 40 mg per day, or intramuscular tetracosactide depot 0·5 mg (40 IU) on alternate days. They found that cessation of spasms was more likely in infants given hormonal treatments (prednisolone [21/30] or tetracosactide [19/25] than those given vigabatrin(28/52) (difference 19%, 95% CI 1%–36%, p=0.043). This is a reversal of the use of vigabatrin for infantile spasms. | | 2013. Cochrane review. “In the majority, methodology has been poor, hence it is not clear which treatment is optimal in the treatment of this epilepsy syndrome. Hormonal treatment resolves spasms in more infants than vigabatrin, but this may or may not translate into better long-term outcomes.“54 | | PubMed | |
| 103 | Effect of intravenous corticosteroids on death within 14 days in 10 008 adults with clinically significant head injury (MRC CRASH trial): randomized placebo-controlled trial Roberts et al. | | Critical care medicine | | 10/9/2004  LANCET | | Corticosteroids are commonly given to head injury patients in an effort to reduce swelling.55 In a UK study, about half of the surveyed units responded that they used corticosteroids at least some of the time to treat head injury,56 and the use was even higher in a US survey.55 10008 adults with head injury and a Glasgow coma score (GCS) of 14 or less within 8 hours of injury were randomly allocated 48 hour infusion of corticosteroids (methylprednisolone) or placebo. They found that, compared to placebo, the risk of death from all causes within 2 weeks was higher in the corticosteroid group (1052 [21.1%] vs 893 [17.9%] deaths, relative risk 1.18 [95% CI 1.09 – 1.27]). This is a reversal of the use of intravenous corticosteroids on patients with clinically significant head injuries. | | 2005. Cochrane review. “In the absence of a meta-analysis, we feel most weight should be placed on the result of the largest trial. The increase in mortality with steroids in this trial suggest that steroids should no longer be routinely used in people with traumatic head injury.”57 | | PubMed | |
| 104 | Oropharyngeal and nasopharyngeal suctioning of meconium-stained neonates before delivery of their shoulders: multicenter, randomized controlled trial Vain et al. | | Obstetrics and Gynecology | | 8/14/2004  LANCET | | Meconium aspiration syndrome (MAS) is a life-threatening respiratory disorder in infants born through meconium-stained amniotic fluid (MSAF). The aspiration of MSAF can be very dangerous for babies being born. During the 1960s, tracheal suctioning was introduced as a way to prevent complications, with oropharyngeal suctioning being added to the practice in the 1970s.58 By the 1990s, suctioning practices were introduced into several guidelines.59 This trial randomized patients of gestational age of at least 37 weeks and cephalic presentation to either suctioning of the oropharynx and nasopharynx (including the hypopharynx) before delivery of the shoulders (n=1263) or to no suctioning (n=1251). They found that there was no significant difference between the two groups in incidence of MAS (52 [4%] suction *vs* 47 [4%] no suction; relative risk 0.9, 95% CI 0.6–1.3), need for mechanical ventilation for MAS (24 [2%] *vs* 18 [1%]; 0.8, 0.4–1.4), mortality (9 [1%] *vs* 4 [0.3%]; 0.4, 0.1–1.5), or in the duration of ventilation, oxygen treatment, and hospital care. This is a reversal of the use of suctioning practices for incidence of MAS. | | 2017. Cochrane review. “The currently available evidence does not support or refute the benefits or harms of routine oro/nasopharyngeal suction over no suction.”60 | | PubMed | |
| 105 | Doubling the dose of inhaled corticosteroid to prevent asthma exacerbations: randomized controlled trial Harrison et al. | | Pulmonary disease | | 1/24/2004  LANCET | | Asthma is treated with steroids because of their anti-inflammatory effect. Patients are often started with inhaled corticosteroids (ICS), but when the recommended dose does not control asthma exacerbations, increasing the dose is a widespread practice, and has even been supported by guidelines.61 This study aimed to investigate whether doubling the dose of inhaled corticosteroid when asthma control starts to deteriorate reduces the number of patients needing prednisolone. 390 patients were randomized into an active (n=192) or placebo (n=198) inhaler in addition to their usual corticosteroid for 14 days. They found that doubling the dose of inhaled steroids did not reduce the risk for needing to go on prednisolone treatment over the course of 12 months (Risk Ratio for starting prednisolone was .95 [95% CI 0.55 – 1.64, p=.8]). This is a reversal of the doubling of inhaled corticosteroid to prevent asthma exacerbations. | | 2016. Cochrane review. “Current evidence does not support increasing the dose of ICS as part of a self-initiated action plan to treat exacerbations in adults and children with mild to moderate asthma. Increased ICS dose is not associated with a statistically significant reduction in the odds of requiring rescue oral corticosteroids for the exacerbation, or of having adverse events, compared with a stable ICS dose”.62 | | PubMed | |
| 106 | Efficacy of a short course of parent-initiated oral prednisolone for viral wheeze in children aged 1–5 years: randomized controlled trial Oommen et al. | | Pediatrics | | 11/1/2003  LANCET | | Wheeze is common in young children, affecting up to half of children by the time they are six.9 Often, the children grow out of it, but it is commonly treated with corticosteroids.63 In this study, children aged 1–5 years admitted to hospital with viral wheeze were allocated to either a high-primed or low-primed stratum according to amounts of serum eosinophil cationic protein and eosinophil protein X, and randomized to parent-initiated prednisolone (n=109) or placebo (n=108) for the next episode. There was no significant different in 7-day mean daytime (difference in means -0.01 [-0.22 – 0.20]) and nighttime respiratory symptom scores (0.10 [−0.12 to 0.32]) between the two groups. This is a reversal of the use of short course patient-initiated oral prednisolone for viral wheeze in young children. | | 2007. Cochrane review. “Limited current evidence is available and it is inconclusive regarding the beneﬁt from patient- and parents- initiate oral corticosteroids (PIOCS) therapy in the treatment of intermittent wheezing illnesses in children.”64  2016 Cochrane review “Current evidence does not support increasing the dose of inhaled corticosteroids (ICS) as part of a self-initiated action plan to treat exacerbations in adults and children with mild to moderate asthma.”62 | | PubMed | |
| 107 | Long-term effect of a watch and wait policy versus immediate systemic treatment for asymptomatic advanced-stage non-Hodgkin lymphoma: a randomised controlled trial Ardeshna KM, Et al | | Oncology | | 8/16/2003  LANCET | | Initial treatment protocols for patients with low-grade non-Hodgkin lymphoma vary but none seems to increase long-term disease-free survival.65 Immediate treatment of chemotherapy, combination chemotherapy, and chemotherapy plus radiation are often used, but retrospective studies have found that delaying treatment until disease progression may be equally as effective.66 This study looked to compared overall and cause-specific survival between a group given immediate systemic therapy with oral chlorambucil 10 mg per day continuously (n=158) with a group with an initial policy of observation (n=151). They found that overall survival and cause-specific survival did not differ between the two groups (median overall survival for oral chlorambucil 5.9 [range 0–17.8] years and for observation 6.7 [0.5–18.9] years, p=0.84; median cause-specific survival 9 [0–17.8] years and 9.1 [0.67–18.9] years, respectively p=0.44). This is a reversal of the policy of immediate systemic treatment of asymptomatic advanced-stage non-Hodgkin lymphoma. | | 2016. NIH Guidelines. "Follicular lymphoma has a long natural history. The conventional view is that apart from very localised disease which may be ablated by local radiotherapy there is no advantage in terms of survival for immediate treatment compared to a watch and wait approach."67 | | PubMed | |
| 108 | Effect of conjugate pneumococcal vaccine followed by polysaccharide pneumococcal vaccine on recurrent acute otitis media: a randomized study Veenhoven et al. | | Pediatrics | | 6/28/2003  LANCET | | The American Academy of Pediatrics has recommended immunization with 7-valent pneumococcal conjugate vaccine (PCV7) for children with recurrent or severe acute otitis media (AOM) and children who have tympanostomy tubes because of recurrent AOM68. This double-blind study randomized 383 patients, aged 1-7 years old, who had had two or more episodes of AOM in the year before entry. Subjects received either 7-valent pneumococcal conjugate vaccine follow by 23-valent pneumococcal polysaccharide vaccine, or hepatitis A or B vaccines. No difference was found in reduction of AOM episodes between the pneumococcal vaccine group compared to the control (Rate ratio 1.25 [95% CI 0.99 – 1.57]). This is a reversal of the use of recommendation of PCV7 for children with recurrent AOM. | | 2014. Cochran review. “Administering PCV7 in older children with a history of AOM appears to have no beneficial effect on preventing further AOM episodes..”69 | | PubMed | |
| 109 | Laparoscopic adhesiolysis in patients with chronic abdominal pain: a blinded randomized controlled multi-center trial Swank et al | | Gastroenterology/Hepatology | | 4/12/2003  LANCET | | Diagnostic laparoscopy is often used to identify specific intraabdominal pathology as the cause for chronic abdominal and pelvic pain.70 71 100 patients who had diagnostic laparoscopy for chronic abdominal pain attributed to adhesions were randomized to either laparoscopic adhesiolysis (n=52) or no treatment (n=48). Pain was assessed for 1 year by visual analogue score, pain change score, use of analgesics, and quality of life score. Both groups reported substantial pain relief and significantly improved quality of life, with no difference between groups (mean change from baseline of VAS score at 12 months: difference 3 points, p=0.53; 95% CI −7 to 13). This is a reversal of laparoscopic adhesiolysis for patients with chronic abdominal pain. | | Study not included in this SR  2015 Langenbeck’s Archives of Surgery “The identified studies showed promising but preliminary results of laparoscopic adhesiolysis as a treatment of chronic abdominal pain. The evidence for laparoscopic adhesiolysis is not sufficient to make definitive conclusions.” | | Laparoscopic adhesiolysis, chronic abdominal pain | |
| 110 | Syndromic management of sexually-transmitted infections and behavior change interventions on transmission of HIV-1 in rural Uganda: a community randomized trial Kamali et al. | | Infectious disease | | 2/22/2003  LANCET | | The rise in HIV incidence during the 1980s led to different types of behavioral and educational programs being implemented at the institutional, community, and population-level, in an effort to reduce the transmission of HIV.72 The main methods of prevention against the pandemic of HIV-1 infection in sub-Saharan Africa are promotion of safer sexual behavior and treatment of sexually transmitted infections (STIs). This study randomized adults in three groups: one receiving behavioral interventions alone (The information, education, and communication intervention was based on the behavioral change for interventions model, n=6918), behavioral interventions and STI interventions(STI intervention was implemented by training health workers in both government and private health units in syndromic management of STIs, n=6856), or routine government health services and community development activities (n=6742). All groups received condoms and HIV counseling and testing. They found no difference in HIV-1 incidence rate between any of the groups. This is a reversal of two practices: 1) the treatment of STIs for prevention of HIV-1, and 2) of the Information, Education, and Communication program (drama and video shows, discussions and meetings), which promotes HIV prevention beyond social marketing of condom use and HIV counseling and testing in rural Uganda. | | 2014. Cochran review. “There is no clear evidence that structural interventions at the community level to increase condom use prevent the transmission of HIV and other STIs.”73 | | PubMed | |
| 111 | Admission cardiotocography: a randomized controlled trial Impey et al | | Obstetrics and Gynecology | | 2/8/2003  LANCET | | Cardiotocography was introduced as a screening test during the 1970s as a way to detect fetal abnormalities and reduce perinatal mortality, and became standard practice within several decades.74 This study randomized 8580 women admitted to the delivery ward of a Dublin teaching hospital who were at low risk of fetal distress in labor to either admission cardiotocography (20 min) (n=4298) or the unit’s usual care (intermittent auscultation only, with continuous cardiotocography only if clinically indicated) (n=4282). The primary endpoint (moderate to severe neonatal morbidity, or perinatal mortality) occurred in 56 (1.3%) of the women assigned to cardiotocography, and 55 (1.3%) in the usual-care group (relative risk 1.01 [95% CI 0.70 – 1.47]). This study does not support the routine use of cardiotocography as a screening test to detect fetal abnormalities, and as such is a reversal. | | 2017. Cochran review. “Contrary to continued use in some clinical areas, we found no evidence of benefit for the use of the admission CTG [admission cardiotocograph] for low-risk women on admission in labour. Furthermore, the probability is that admission CTG increases the caesarean section rate by approximately 20%.”75 | | PubMed | |
| 112 | Comparison of intermittent and continuous palliative chemotherapy for advanced colorectal cancer: a multicenter randomized trial Maughan et al. | | Oncology | | 2/8/2003  LANCET | | Colorectal cancer is a common cancer with a wide array of treatment/management practices. At the time of this study, some physicians reported prescribing chemotherapy for about 3 months, many (47%) reported prescribing chemotherapy for 6 months, and 20% reported prescribing chemotherapy indefinitely to patients with stable or responding disease.76 354 patients, who responded or had stable disease after receiving 12 weeks of the regimens described by de Gramont and Lokich, or raltitrexed chemotherapy, across 42 centers in the UK were randomized to either intermittent (n=178) or continuous (n=176) chemotherapy. Median time on treatment after restarting was 84 days for the intermittent group and 92 days for the continuous groups. The intermittent group had significantly fewer toxic effects and series adverse events compared to the continuous group. Both groups had similar proportions of patients who received second-line therapy, and there was no evidence of a difference in overall survival. This is a reversal of the use of continuous palliative chemotherapy for advanced colorectal cancer. | | 2014. Annals of Oncology. “There were no statistically significant survival differences observed between the continuous and intermittent chemotherapy strategies.”77 | | PubMed | |
| 113 | Intrahepatic arterial versus intravenous fluorouracil and folinic acid for colorectal cancer liver metastases: a multicentre randomised trial Kerr et al. | | | Oncology | | 2/1/2003  Lancet | | Colon cancer, one of the most common types of cancer, has a relapse rate, after surgery, of about 50%, with the liver being a common site for metastasis.78 Intrahepatic arterial infusion (IHA) has been used as a method of delivering chemotherapy because it is thought that there would be a higher dose of chemotherapy to cancer cells, while lessoning the side-effects of chemotherapy.79 80 This trial randomly allocated 290 patients from 16 centers to receive either intravenous chemotherapy (folinic acid 200 mg/m[2](https://www.sciencedirect.com/science/article/pii/S0140673603123884" \l "bib2), fluorouracil bolus 400 mg[2](https://www.sciencedirect.com/science/article/pii/S0140673603123884#bib2) and 22-h infusion 600 mg/m[2](https://www.sciencedirect.com/science/article/pii/S0140673603123884#bib2), day 1 and 2, repeated every 14 days) or IHA chemotherapy designed to be equitoxic (folinic acid 200 mg/m[2](https://www.sciencedirect.com/science/article/pii/S0140673603123884#bib2), fluorouracil 400 mg/m[2](https://www.sciencedirect.com/science/article/pii/S0140673603123884#bib2) over 15 mins and 22-h infusion 1600 mg/m[2](https://www.sciencedirect.com/science/article/pii/S0140673603123884#bib2), day 1 and 2, repeated every 14 days). Median survival in the IHA group was 14.7 months and was 14.8 months in the intravenous group (hazard ratio 1.04 [95% CI 0.80 – 1.33]). This is a reversal of the use of IHA for patients with colorectal cancer liver metastases. | | 2009. Cochrane review. “Currently available evidence does not support the clinical or investigational use of ﬂuoropyrimidine-based HAI alone f or the treatment of patients with unresectable CRC liver metastases: in fact, the greater tumor response rate obtained with this IHA regimen does not translate into a survival advantage over ﬂuoropyrimidine alone SCT.”81 | | PubMed | |

1. American Cancer Society. History of ACS Recommendations for the Early Detection of Cancer in People Without Symptoms 2014 [updated 2017].

2. Gotzsche PC, Jorgensen KJ. Screening for breast cancer with mammography. *Cochrane Database Syst Rev* 2013(6):Cd001877. doi: 10.1002/14651858.CD001877.pub5 [published Online First: 2013/06/06]

3. Cook TM, Protheroe RT, Handel JM. Tetanus: a review of the literature. *BJA: British Journal of Anaesthesia* 2001;87(3):477-87. doi: 10.1093/bja/87.3.477

4. Sutton D, Tremlett M, Woodcock T, et al. Management of autonomic dysfunction in severe tetanus: the use of magnesium sulphate and clonidine. *Intensive care medicine* 1990;16(2):75-80.

5. Rodrigo C, Samarakoon L, Fernando SD, et al. A meta-analysis of magnesium for tetanus. *Anaesthesia* 2012;67(12):1370-74. doi: 10.1111/anae.12020

6. Biller J, Feinberg WM, Castaldo JE, et al. Guidelines for carotid endarterectomy: a statement for healthcare professionals from a special writing group of the Stroke Council, American Heart Association. *Circulation* 1998;97(5):501-09.

7. John TA, Gough MJ. A late complication of internal carotid artery stenting. *Journal of Vascular Surgery* 1998;27(4):753-55. doi: <https://doi.org/10.1016/S0741-5214(98)70244-7>

8. Meier P, Knapp G, Tamhane U, et al. Short term and intermediate term comparison of endarterectomy versus stenting for carotid artery stenosis: systematic review and meta-analysis of randomised controlled clinical trials. *BMJ* 2010;340:c467.

9. Martinez FD, Wright AL, Taussig LM, et al. Asthma and wheezing in the first six years of life. *New England Journal of Medicine* 1995;332(3):133-38.

10. Strachan DP, Butland BK, Anderson HR. Incidence and prognosis of asthma and wheezing illness from early childhood to age 33 in a national British cohort. *BMJ : British Medical Journal* 1996;312(7040):1195-99.

11. Holt S, Suder A, Weatherall M, et al. Dose-response relation of inhaled fluticasone propionate in adolescents and adults with asthma: meta-analysis. *BMJ : British Medical Journal* 2001;323(7307):253-53.

12. Kierdorf HP, Sieberth HG. Continuous renal replacement therapies versus intermittent hemodialysis in acute renal failure: What do we know? *American Journal of Kidney Diseases*;28(5):S90-S96. doi: 10.1016/S0272-6386(96)90085-2

13. Rabindranath K, Adams J, Macleod AM, et al. Intermittent versus continuous renal replacement therapy for acute renal failure in adults. *Cochrane Database Syst Rev* 2007(3):Cd003773. doi: 10.1002/14651858.CD003773.pub3 [published Online First: 2007/07/20]

14. Homburg R, Howles CM. Low-dose FSH therapy for anovulatory infertility associated with polycystic ovary syndrome: rational, results, reflections refinements. *Human Reproduction Update* 1999;5(5):493-99. doi: 10.1093/humupd/5.5.493

15. Veltman-Verhulst SM, Hughes E, Ayeleke RO, et al. Intra-uterine insemination for unexplained subfertility. *Cochrane Database Syst Rev* 2016;2:Cd001838. doi: 10.1002/14651858.CD001838.pub5 [published Online First: 2016/02/20]

16. Hurley KF, Magee K, Green R. Aminophylline for bradyasystolic cardiac arrest in adults. *Cochrane Database Syst Rev* 2015(11):Cd006781. doi: 10.1002/14651858.CD006781.pub3 [published Online First: 2015/11/26]

17. Richard A Harrigan and William J Brady. The Clinical Challenge of Bradycardia: Diagnosis, Evaluation, and Intervention in the Emergency Department 2000 [Available from: <https://www.ahcmedia.com/articles/58758-the-clinical-challenge-of-bradycardia-diagnosis-evaluation-and-intervention>.

18. Abu-Laban RB, McIntyre CM, Christenson JM, et al. Aminophylline in bradyasystolic cardiac arrest: a randomised placebo-controlled trial. *The Lancet*;367(9522):1577-84. doi: 10.1016/S0140-6736(06)68694-7

19. Stoltzfus RJ, Dreyfuss ML. Guidelines for the use of iron supplements to prevent and treat iron deficiency anemia: Ilsi Press Washington, DC 1998.

20. Sazawal S, Black RE, Ramsan M, et al. Effects of routine prophylactic supplementation with iron and folic acid on admission to hospital and mortality in preschool children in a high malaria transmission setting: community-based, randomised, placebo-controlled trial. *The Lancet* 2006;367(9505):133-43.

21. Neuberger A, Okebe J, Yahav D, et al. Oral iron supplements for children in malaria‐endemic areas. *The Cochrane Library* 2016.

22. Trnka L, Dankova D, Zitova J, et al. Survey of BCG vaccination policy in Europe: 1994-96. *Bulletin of the World Health Organization* 1998;76(1):85.

23. Robin ED. Death by pulmonary artery flow-directed catheter. Time for a moratorium? *Chest* 1987;92(4):727-31. [published Online First: 1987/10/01]

24. Rajaram SS, Desai NK, Kalra A, et al. Pulmonary artery catheters for adult patients in intensive care. *Cochrane Database Syst Rev* 2013(2):Cd003408. doi: 10.1002/14651858.CD003408.pub3 [published Online First: 2013/03/02]

25. Lyczak JB, Cannon CL, Pier GB. Lung Infections Associated with Cystic Fibrosis. *Clinical Microbiology Reviews* 2002;15(2):194-222. doi: 10.1128/CMR.15.2.194-222.2002

26. Chernish RN, Aaron SD. Approach to resistant gram-negative bacterial pulmonary infections in patients with cystic fibrosis. *Current opinion in pulmonary medicine* 2003;9(6):509-15. [published Online First: 2003/10/10]

27. Waters V, Ratjen F. Combination antimicrobial susceptibility testing for acute exacerbations in chronic infection of Pseudomonas aeruginosa in cystic fibrosis. *Cochrane Database Syst Rev* 2017;6:Cd006961. doi: 10.1002/14651858.CD006961.pub4 [published Online First: 2017/06/20]

28. Everitt H, Little P. How do GPs diagnose and manage acute infective conjunctivitis? A GP survey. *Fam Pract* 2002;19(6):658-60. [published Online First: 2002/11/14]

29. Jefferis J, Perera R, Everitt H, et al. Acute infective conjunctivitis in primary care: who needs antibiotics? An individual patient data meta-analysis. *Br J Gen Pract* 2011;61(590):e542-8. doi: 10.3399/bjgp11X593811 [published Online First: 2011/12/14]

30. Jones A, Cahill D, Gardham R. Outcome in patients with a large abdominal aortic aneurysm considered unfit for surgery. *British Journal of Surgery* 1998;85(10):1382-84. doi: doi:10.1046/j.1365-2168.1998.00947.x

31. Zarins CK, Wolf YG, Lee WA, et al. Will endovascular repair replace open surgery for abdominal aortic aneurysm repair? *Annals of surgery* 2000;232(4):501.

32. Paravastu SC, Jayarajasingam R, Cottam R, et al. Endovascular repair of abdominal aortic aneurysm. *Cochrane Database Syst Rev* 2014(1):Cd004178. doi: 10.1002/14651858.CD004178.pub2 [published Online First: 2014/01/24]

33. Introduction of the medical emergency team (MET) system: a cluster-randomised controlled trial. *The Lancet* 2005;365(9477):2091-97. doi: <https://doi.org/10.1016/S0140-6736(05)66733-5>

34. Kenward G, Castle N, Hodgetts T, et al. Evaluation of a medical emergency team one year after implementation. *Resuscitation* 2004;61(3):257-63.

35. Daly FFS, Sidney KL, Fatovich DM. The Medical Emergency Team (MET): a model for the district general hospital. *Australian and New Zealand Journal of Medicine* 1998;28(6):795-98. doi: doi:10.1111/j.1445-5994.1998.tb01556.x

36. Chan PS, Jain R, Nallmothu BK, et al. Rapid response teams: a systematic review and meta-analysis. *Archives of internal medicine* 2010;170(1):18-26.

37. Intakes IoMSCotSEoDR. Dietary reference intakes for calcium, phosphorus, magnesium, vitamin D, and fluoride: National Academies Press (US) 1997.

38. Murray TM. Prevention and management of osteoporosis: consensus statements from the Scientific Advisory Board of the Osteoporosis Society of Canada. 4. Calcium nutrition and osteoporosis. *CMAJ: Canadian Medical Association Journal* 1996;155(7):935-39.

39. McKercher H, Crilly R, Kloseck M. Osteoporosis management in long-term care. Survey of Ontario physicians. *Canadian Family Physician* 2000;46(11):2228-35.

40. Avenell A, Mak JC, O'Connell D. Vitamin D and vitamin D analogues for preventing fractures in post-menopausal women and older men. *Cochrane Database Syst Rev* 2014(4):Cd000227. doi: 10.1002/14651858.CD000227.pub4 [published Online First: 2014/04/15]

41. REPINE JE, BAST A, LANKHORST I, et al. Oxidative Stress in Chronic Obstructive Pulmonary Disease. *American Journal of Respiratory and Critical Care Medicine* 1997;156(2):341-57. doi: 10.1164/ajrccm.156.2.9611013

42. Stey C, Steurer J, Bachmann S, et al. The effect of oral N-acetylcysteine in chronic bronchitis: a quantitative systematic review. *European Respiratory Journal* 2000;16(2):253-62.

43. Criner GJ, Bourbeau J, Diekemper RL, et al. Prevention of Acute Exacerbations of COPD: American College of Chest Physicians and Canadian Thoracic Society Guideline. *Chest* 2015;147(4):894-942. doi: <https://doi.org/10.1378/chest.14-1676>

44. Dávalos A, Ricart W, Gonzalez-Huix F, et al. Effect of Malnutrition After Acute Stroke on Clinical Outcome. *Stroke* 1996;27(6):1028-32. doi: 10.1161/01.str.27.6.1028

45. Goodhall L. Tube feeding dilemmas: can artificial nutrition and hydration be legally or ethically withheld or withdrawn? *Journal of Advanced Nursing* 1997;25(2):217-22.

46. Sullivan DH, Sun S, Walls RC. Protein-energy undernutrition among elderly hospitalized patients: A prospective study. *JAMA* 1999;281(21):2013-19. doi: 10.1001/jama.281.21.2013

47. Milne AC, Potter J, Vivanti A, et al. Protein and energy supplementation in elderly people at risk from malnutrition. *Cochrane Database Syst Rev* 2009(2):Cd003288. doi: 10.1002/14651858.CD003288.pub3 [published Online First: 2009/04/17]

48. Mckissock W, Richardson A, Taylor J. Primary intracerebral haemorrhage: a controlled trial of surgical and conservative treatment in 180 unselected cases. *The Lancet* 1961;278(7196):221-26.

49. Auer LM, Deinsberger W, Niederkorn K, et al. Endoscopic surgery versus medical treatment for spontaneous intracerebral hematoma: a randomized study. *J Neurosurg* 1989;70(4):530-5. doi: 10.3171/jns.1989.70.4.0530 [published Online First: 1989/04/01]

50. Kaneko M, Tanaka K, Shimada T, et al. Long-term evaluation of ultra-early operation for hypertensive intracerebral hemorrhage in 100 cases. *J Neurosurg* 1983;58(6):838-42. doi: 10.3171/jns.1983.58.6.0838 [published Online First: 1983/06/01]

51. Prasad K, Mendelow AD, Gregson B. Surgery for primary supratentorial intracerebral haemorrhage. *The Cochrane Library* 2008

52. Koo B. Vigabatrin in the treatment of infantile spasms. *Pediatric Neurology* 1999;20(2):106-10. doi: <https://doi.org/10.1016/S0887-8994(98)00116-7>

53. Baharoglu MI, Cordonnier C, Salman RA-S, et al. Platelet transfusion versus standard care after acute stroke due to spontaneous cerebral haemorrhage associated with antiplatelet therapy (PATCH): a randomised, open-label, phase 3 trial. *The Lancet* 2016;387(10038):2605-13.

54. Hancock EC, Osborne JP, Edwards SW. Treatment of infantile spasms. *Cochrane Database Syst Rev* 2013(6):Cd001770. doi: 10.1002/14651858.CD001770.pub3 [published Online First: 2013/06/07]

55. Ghajar J, Hariri RJ, Narayan RK, et al. Survey of critical care management of comatose, head-injured patients in the United States. *Crit Care Med* 1995;23(3):560-7. [published Online First: 1995/03/01]

56. Jeevaratnam DR, Menon DK. Survey of intensive care of severely head injured patients in the United Kingdom. *BMJ : British Medical Journal* 1996;312(7036):944-47.

57. Alderson P, Roberts I. Corticosteroids for acute traumatic brain injury. *Cochrane Database Syst Rev* 2005(1):Cd000196. doi: 10.1002/14651858.CD000196.pub2 [published Online First: 2005/01/28]

58. Wiswell TE, Tuggle JM, Turner BS. Meconium aspiration syndrome: have we made a difference? *Pediatrics* 1990;85(5):715-21.

59. Vain NE, Szyld EG, Prudent LM, et al. Oropharyngeal and nasopharyngeal suctioning of meconium-stained neonates before delivery of their shoulders: multicentre, randomised controlled trial. *The Lancet* 2004;364(9434):597-602. doi: <https://doi.org/10.1016/S0140-6736(04)16852-9>

60. Foster JP, Dawson JA, Davis PG, et al. Routine oro/nasopharyngeal suction versus no suction at birth. *Cochrane Database Syst Rev* 2017;4:Cd010332. doi: 10.1002/14651858.CD010332.pub2 [published Online First: 2017/04/19]

61. Harrison TW, Oborne J, Newton S, et al. Doubling the dose of inhaled corticosteroid to prevent asthma exacerbations: randomised controlled trial. *The Lancet* 2004;363(9405):271-75. doi: <https://doi.org/10.1016/S0140-6736(03)15384-6>

62. Kew KM, Quinn M, Quon BS, et al. Increased versus stable doses of inhaled corticosteroids for exacerbations of chronic asthma in adults and children. *Cochrane Database Syst Rev* 2016(6):Cd007524. doi: 10.1002/14651858.CD007524.pub4 [published Online First: 2016/06/09]

63. McKean MC, Ducharme F. Inhaled steroids for episodic viral wheeze of childhood. *The Cochrane Library* 2000

64. Vuillermin P, South M, Robertson C. Parent-initiated oral corticosteroid therapy for intermittent wheezing illnesses in children. *Cochrane Database Syst Rev* 2006(3):Cd005311. doi: 10.1002/14651858.CD005311.pub2 [published Online First: 2006/07/21]

65. Horning SJ. Follicular lymphoma: have we made any progress? *Annals of oncology : official journal of the European Society for Medical Oncology* 2000;11 Suppl 1:23-7. [published Online First: 2000/03/09]

66. O'Brien ME, Easterbrook P, Powell J, et al. The natural history of low grade non-Hodgkin's lymphoma and the impact of a no initial treatment policy on survival. *The Quarterly journal of medicine* 1991;80(292):651-60. [published Online First: 1991/08/01]

67. National Guideline A. National Institute for Health and Care Excellence: Clinical Guidelines. Non-Hodgkin's Lymphoma: Diagnosis and Management. London: National Institute for Health and Care Excellence (UK)

Copyright (c) National Institute for Health and Care Excellence 2016. 2016.

68. American Academy of Pediatrics. Committee on Infectious Diseases. Policy statement: recommendations for the prevention of pneumococcal infections, including the use of pneumococcal conjugate vaccine (Prevnar), pneumococcal polysaccharide vaccine, and antibiotic prophylaxis. *Pediatrics* 2000;106(2 Pt 1):362-6. [published Online First: 2000/08/02]

69. Fortanier AC, Venekamp RP, Boonacker CW, et al. Pneumococcal conjugate vaccines for preventing otitis media. *Cochrane Database Syst Rev* 2014(4):Cd001480. doi: 10.1002/14651858.CD001480.pub4 [published Online First: 2014/04/04]

70. Freys S, Fuchs K, Heimbucher J, et al. Laparoscopic adhesiolysis. *Surgical endoscopy* 1994;8(10):1202-07.

71. Klingensmith M, Soybel D, Brooks D. Laparoscopy for chronic abdominal pain. *Surgical endoscopy* 1996;10(11):1085-87.

72. Council NR. Preventing and mitigating AIDS in Sub-Saharan Africa: Research and data priorities for the social and behavioral sciences: National Academies Press 1996.

73. Moreno R, Nababan HY, Ota E, et al. Structural and community-level interventions for increasing condom use to prevent the transmission of HIV and other sexually transmitted infections. *Cochrane Database Syst Rev* 2014(7):Cd003363. doi: 10.1002/14651858.CD003363.pub3 [published Online First: 2014/07/30]

74. Goddard R. Electronic fetal monitoring : Is not necessary for low risk labours. *BMJ : British Medical Journal* 2001;322(7300):1436-37.

75. Devane D, Lalor JG, Daly S, et al. Cardiotocography versus intermittent auscultation of fetal heart on admission to labour ward for assessment of fetal wellbeing. *Cochrane Database Syst Rev* 2017;1:Cd005122. doi: 10.1002/14651858.CD005122.pub5 [published Online First: 2017/01/27]

76. Seymour MT, Stenning SP, Cassidy J. Attitudes and practice in the management of metastatic colorectal cancer in Britain. *Clinical Oncology* 1997;9(4):248-51. doi: <https://doi.org/10.1016/S0936-6555(97)80010-6>

77. Berry S, Group CCOsGDS, Cosby R, et al. Continuous versus intermittent chemotherapy strategies in metastatic colorectal cancer: a systematic review and meta-analysis. *Annals of Oncology* 2014;26(3):477-85.

78. Midgley R, Kerr D. Colorectal cancer. *Lancet* 1999;353(9150):391-9. doi: 10.1016/s0140-6736(98)07127-x [published Online First: 1999/02/09]

79. Ansfield FJ, Ramirez G, Skibba JL, et al. Intrahepatic arterial infusion with 5‐fluorouracil. *Cancer* 1971;28(5):1147-51.

80. Fortner JG, Silva JS, Golbey RB, et al. Multivariate analysis of a personal series of 247 consecutive patients with liver metastases from colorectal cancer. I. Treatment by hepatic resection. *Annals of surgery* 1984;199(3):306.

81. Mocellin S, Pasquali S, Nitti D. Fluoropyrimidine‐HAI (hepatic arterial infusion) versus systemic chemotherapy (SCT) for unresectable liver metastases from colorectal cancer. *The Cochrane Library* 2009

| **#** | **Article and**  **Authors** | **Primary Medical Discipline** | **Date and Journal** | **Summary** | **Systematic Review** | **Systematic Review Search Terms** |
| --- | --- | --- | --- | --- | --- | --- |
| 309 | Lansoprazole for Children With Poorly Controlled Asthma A Randomized Controlled Trial  Writing Committee for the American Lung Association Asthma Clinical Research Centers | Pulmonary | 1/25/2012 JAMA | Children with asthma who frequently display symptoms are generally treated with proton pump inhibitors (PPI) for gastroesophageal reflux (GER). The use of PPIs has increased dramatically in the United States with a reported 5% of children in the US being on the medication in 2009.1 This study compared asthma symptoms in children without symptoms of GER who were prescribed lansoprazole (n=149), a type of PPI, or placebo (n=157). This trial found that in children with poorly controlled asthma without symptoms of GER, the addition of lansoprazole as compared to placebo did not improve asthma symptoms. The mean difference in change in Asthma Control Questionnaire scores between lansoprazole and placebo groups was 0.2 units (95% CI, -0.0 to 0.3; P=.12). This is a reversal of lansoprazole for improving asthma symptoms in children with poorly controlled asthma. | None found | lansoprazole, ashtma outcomes, GER, children |
| 310 | Amoxicillin for Acute Rhinosinusitis A Randomized Controlled Trial  Garbutt et al. | Public health/ Preventive medicine | 2/15/2012 JAMA | Sinusitis is one of the most common medical diagnoses and has led to 25 million US physician office visits in 1995.2 Antibiotics were prescribed in adults 60-70% at the time, and in children 70-80% of the time, even though this condition is often viral.3 This study provides further evidence of the ineffectiveness of general antibiotic use for those with acute rhinosinusitis. A 10-day course of amoxicillin (n=81) did not improve disease-specific quality of life compared to placebo (n=74) after 3 days (difference in symptom improvement, 37% for amoxicillin group vs 34% for placebo group; P=.67) and 10 days of treatment (78% vs 80%; P=.71). This is a reversal of amoxicillin for treatment of acute rhinosinusitis. | 2012. Cochrane review. “The potential benefit of antibiotics in the treatment of clinically diagnosed acute rhinosinusitis needs to be seen in the context of a high prevalence of adverse events. Taking into account antibiotic resistance and the very low incidence of serious complications, we conclude that there is no place for antibiotics for the patient with clinically diagnosed, uncomplicated acute rhinosinusitis.”4 | Pubmed found systematic review |
| 311 | Intracoronary Abciximab and Aspiration Thrombectomy in Patients With Large Anterior Myocardial Infarction The INFUSE-AMI Randomized Trial  Stone et al. | Cardiovascular | 5/02/2012 JAMA | Percutaneous coronary intervention (PCI) is widely used for patients with ST-segment elevation myocardial infarction (STEMI). Aspiration of a thrombus formed during PCI is recommended as part of primary PCI to prevent thrombus embolization and has become standard practice after several randomized controlled trials showed efficacy in the procedure.5 6 This trial investigated with effects of manual aspiration and bolus intracoronary abciximab in patients with STEMI undergoing PCI. They found that while abciximab (n=188) was effective at reducing infarct size at 30 days compared to no abciximab (n=184), aspiration thrombectomy (median, 17.0%; 95% CI, 9.0-22.8; n=174) did not improve infarct size at 30 days compared to no aspiration thrombectomy (median, 17.3%; 95% CI, 7.1-25.5; n=179; P=.51). This is a reversal of aspiration thrombectomy for patients with STEMI undergoing PCI. | 2014. “The present meta-analysis suggested that there was no evidence that using manual thrombus aspiration in patients with STEMI could provide distinct benefits in long-term clinical outcomes.”7 | Pubmed found systematic review |
| 312 | Effect of Continuous Positive Airway Pressure on the Incidence of Hypertension and Cardiovascular Events in Nonsleepy Patients With Obstructive Sleep Apnea A Randomized Controlled Trial  Barbe et al. | Pulmonary | 5/23/2012+ 5/30/2012 JAMA | Obstructive sleep apnea (OSA), which is a partial or complete collapse of the airway during sleep, has been estimated to affect between 2-7% of adults.8 Continuous positive airway pressure (CPAP) machines were first introduced in 1981 for people with OSA, and are now standard of care.9 In the early 2000's there was increased interest in CPAPs being used to prevent cardiovascular disease, even among patients with minimal symptoms.10 In this trial, use of CPAP (n=357), compared with usual care (n=366), did not lead to a reduction in the incidence rate of systemic hypertension or cardiovascular events in patients with OSA without daytime sleepiness (9.20 per 100 person-years for CPAP group vs 11.02 per 100 person-years for control group; incidence density ratio, 0.83; 95% CI, 0.63-1.1; P=.20). This is a reversal of CPAP for reducing incidence of hypertension and cardiovascular events in nonsleepy patients with OSA. | “Although CPAP treatment reduces OSA severity and sleepiness, it seems not to have a beneficial effect on BP in patients with minimally symptomatic OSA....”11 | Pubmed found systematic review |
| 313 | Effect of Silymarin (Milk Thistle) on Liver Disease in Patients With Chronic Hepatitis C Unsuccessfully Treated With Interferon Therapy A Randomized Controlled Trial  Fried et al. | Gastroenterology/Hepatology | 7/18/2012 JAMA | Silymarin (Silybum marianum), an extract from milk thistle, is often used as an alternative treatment for liver health, and is thought to be hepatoprotective.12 With this in mind, silymarin is often used by people with hepatitis C virus (HCV) infection - as many as 33% of these patients.13 While the extract has been shown to have hepatoprotective and immunomodulatory effects in vitro,14 clinical trials have shown mixed results in its efficacy.15 In this randomized controlled trial, 420-mg silymarin (n=50) and 700-mg silymarin (n=52) were found to be no better at reducing the liver enzyme alanine aminotransferase (ALT) than placebo (n=52). Only 2 participants from each group reached a serum level of 45 U/L or less or less than 65 U/L, provided that is was at least a 50% decline from baseline values (P≥.99). This is a reversal of silymarin as a hepatoprotective agent for patients with chronic HCV. Levels of ALT was used as a surrogate outcome for hepatoprotection in this study. | 2014. “Silymarin is well tolerated in chronic HCV-infected patients. However, no evidence of salutary effects of oral silymarin has yet been reported based on intermediate endpoints (ALT and HCV RNA) in this population. Moreover, intravenous administration of silymarin should be further studied.”16 | Pubmed found systematic review |
| 314 | Effect of Screening for Partner Violence on Women's Quality of Life A Randomized Controlled Trial  Klevens et al. | Public health/ Preventive medicine | 8/15/2012 JAMA | Screening for intimate partner violence (IPV) in the clinical setting has been recommended by several organizations,17 even though the USPSTF determined that there was insufficient evidence for its effectiveness.18 Computerized screening has been implemented as a way to increase the number of people who report IPV.19 In this trial, computerized screening for IPV plus a list of partner violence resources (n=801) did not increase patients' quality of life one year follow-up compared to partner-violence resource list only (n= 772) or a control of no screening or list (n=791). At 1-year follow-up, there were no significant differences in the QOL physical health component between the screen plus partner violence resource list group (mean score, 46.8; 95% CI, 46.1-47.4), the partner violence resource list only group (mean score, 46.4; 95% CI, 45.8-47.1), and the control group (mean score, 47.2; 95% CI, 46.5-47.8). This is a reversal of screening for partner violence in clinical settings for better quality of life in women. | 2015. Cochrane review. “Thus, while screening increases identification, there is insufficient evidence to justify screening in healthcare settings. Furthermore, there remains a need for studies comparing universal screening to case-finding (with or without advocacy or therapeutic interventions) for women's long-term wellbeing in order to inform IPV identification policies in healthcare settings.”20 | Pubmed found systematic review |
| 315 | Multivitamins in the Prevention of Cardiovascular Disease in Men The Physicians' Health Study II Randomized Controlled Trial  Sesso et al. | Public health/ Preventive medicine | 11/07/2012 JAMA | In the 1990s, when this randomized controlled study began, about one out of every 5 adults took a multi-vitamin, partly driven by a belief that multivitamins affected disease outcomes.21 And, while the rate of multi-vitamin prescribing practices was low among physicians, about 10% of the prescriptions were related to cardiovascular disease.22 In this trial of US male physicians, a daily multivitamin supplement (n=7317) did not reduce a composite of major cardiovascular events, including MI, stroke, and CVD mortality compared to placebo (n=7324). Rate of major cardiovascular events was 11.0 events per 1000 person-years in the multivitamin group vs 10.8 events/1000 person-years in the placebo group (HR, 1.01; 95% CI, 0.91-1.10; P=.91). This is a reversal of multivitamins for preventing cardiovascular disease in men. | 2017. “Taken together, we found insufficient evidence to support the use of dietary supplements in the primary prevention of cause-specific death, incidence of CVD, and incidence of cancer.”23 | Pubmed found systematic review |
| 316 | Intraoperative High-Dose Dexamethasone for Cardiac Surgery A Randomized Controlled Trial  Dieleman et al. | Cardiovascular | 11/07/2012 JAMA | Corticosteroids are thought to be beneficial in cardiac surgery because they have shown to decrease inflammatory markers and improve pulmonary gas exchange, potentially reducing inflammation and administration of postoperative inotropic agents .24 Corticosteroid use in cardiac surgery is more common in Europe countries than the US, where it is not routinely used.25 In this randomized controlled trial, the use of dexamethasone, a long-lasting corticosteroid, (n=2235) in patients undergoing cardiac surgery did not reduce 30-day incidence of major adverse events compared to placebo (n=2247). A composite of death, myocardial infarction, stroke, renal failure, or respiratory failure was seen in 7.0% patients in the dexamethasone group and 8.5% patients in the placebo group (RR, 0.83; 95% CI, 0.67-1.01; absolute RR, -1.5%; 95% CI, -3.0% to 0.1%; P=.07). This is a reversal of high-dose dexamethasone for improving outcomes in patients undergoing cardiac surgery. | 2014. “Evidence does not equivocally support the use of corticosteroids to improve clinical outcomes in cardiac surgery patients.”26 | Google search “cardiac surgery corticosteroid systematic review” |
| 317 | Effect of Citicoline on Functional and Cognitive Status Among Patients With Traumatic Brain Injury Citicoline Brain Injury Treatment Trial (COBRIT)  Zafonte et al. | Neurology | 11/21/2012 JAMA | Traumatic brain injury (TBI) is a serious public health problem in the United States, yet no treatment is currently available to improve patient outcomes after TBI. Recognized in 1956 as the intermediate element in the biosynthesis of phosphatidylcholine (a key constituent of neuronal membranes), citicoline may have a pleiotropic range of neuroprotective properties, and is an approved therapy for TBI in 59 countries.27 This study found that among patients with TBI, the use of citicoline (n=508) compared with placebo (n=509) did not result in improvement in functional and cognitive status. At 90 days, the citicoline and placebo groups had similar TBI-Clinical Trials Network Core Battery scores (OR, 0.98; 95% CI, 0.83-1.15), with favorable improvement rates at 35.4% and 35.6%, respectively. This is a reversal of citicoline for improving functional and cognitive status in patients with TBI. | 2017. “The available evidence doesn’t support current routine use of Citicoline for acute TBI management. Citicoline use for managing impaired neuro-cognitive conditions in chronic TBI patients is weak and needs further research.”28 | Pubmed found systematic review |
| 318 | Fish Oil and Postoperative Atrial Fibrillation The Omega-3 Fatty Acids for Prevention of Post-operative Atrial Fibrillation (OPERA) Randomized Trial  Mozaffarian et al. | Cardiovascular | 11/21/2012 JAMA | Omega-3 fatty acids from fish oil have been shown to be beneficial in treating atrial fibrillation (AF) in animals, and observational studies have produced similar findings.29 This benefit may be due to their inhibition of fast, voltage-dependent sodium channels.30 Because of previous findings in research (both animal and human studies), some physicians have published recommendations for the supplementation of 800-1000 mg/day of EPA and DHA to help prevent AF, a condition common after cardiac surgery.30 In the OPERA trial, there was no improvement in postoperative AF in those supplemented with omega-3 fatty acids (n=758) compared to placebo (n=758). Postoperative AF lasting longer than 30 seconds occurred in 30.0% of patients in the omega-3 group and 30.7% of patients in the placebo group (OR, 0.96; 95% CI, 0.77-1.20; P=.74). This is a reversal of fish oil for preventing post-operative AF. | 2013 “Published clinical trials do not support n-3 PUFAs as agents aimed at preventing either postoperative or recurrent AF.”31 | Pubmed found systematic review |
| 319 | Behavioral Therapy With or Without Biofeedback and Pelvic Floor Electrical Stimulation for Persistent Postprostatectomy Incontinence A Randomized Controlled Trial  Goode et al. | Urology | 1/12/2011 JAMA | One in 6 men are at risk of prostate cancer, and prostatectomies are a common treatment for the cancer, although adverse events from these surgical procedures are common.32 Urinary incontinence occurs in as many as 65% of men after radical prostatectomy.33 Biofeedback and pelvic floor electrical stimulation (PFES) are often used together to enhance the effectiveness of behavioral therapy for the treatment of urinary incontinence in this population.34 This study aimed to evaluate the effectiveness of behavioral therapy for reducing persistent postprostatectomy incontinence and to determine whether the technologies of biofeedback and pelvic floor electrical stimulation enhance the effectiveness of behavioral therapy. They found that after 8 weeks, the behavioral therapy group (n=70) and the behavioral therapy plus biofeedback and PFES group (n=70) compared with the delayed-treatment control (n=64) resulted in fewer incontinence episodes in patients with urinary incontinence (55% reduction in behavioral group; 51% reduction in behavioral plus biofeedback and PFES group; P=.001 for both groups). However, the addition of biofeedback and pelvic floor electrical stimulation did not result in greater effectiveness (P=.69). While behavioral therapy showed efficacy, the technological additions of biofeedback and PFES had no effect on incontinence. This is a reversal of biofeedback and PFES for postprostectomy incontinence. | 2015. Cochrane review. “This systematic review found insufficient evidence to state whether or not there were additional effects by adding PFMT to other active treatments when compared with the same active treatment alone for urinary incontinence (SUI, UUI or MUI) in women. These results should be interpreted with caution as most of the comparisons were investigated in small, single trials. None of the trials in this review were large enough to provide reliable evidence. Also, none of the included trials reported data on adverse events associated with the PFMT regimen, thereby making it very difficult to evaluate the safety of PFMT.”35 | Pubmed found systematic review |
| 320 | Adjunctive Risperidone Treatment for Antidepressant-Resistant Symptoms of Chronic Military Service–Related PTSD A Randomized Trial  Krystal et al. | Psychiatry | 8/3/2011 JAMA | Several serotonin reuptake-inhibiting (SRI) antidepressants have received FDA approval for the treatment of posttraumatic stress disorder (PTSD), and are first-line treatments. Second-generation antipsychotics (SGAs) practice, such as risperidone, are also sometimes used. This trial compared risperidone (n=123) to placebo (n=124) in patients diagnosed with military –related PTSD whose symptoms persisted after 2 treatments with SRI drugs. The study found that the risperidone group did not have improvements in PTSD symptoms. Changes in Clinician-Administered PTSD Scale scores at 24 weeks were -16.3 in the risperidone group and -12.5 in the placebo group (mean difference, 3.74; 95% CI, -0.86 to 8.35; t=1.4; P=.11). This is a reversal of risperidone for treating military service-related PTSD. | 2015. “Some drugs have a small positive impact on PTSD symptoms and are acceptable. Fluoxetine, paroxetine and venlafaxine may be considered as potential treatments for the disorder. For most drugs there is inadequate evidence regarding  efficacy for PTSD, pointing to the need for more research in this area… Four drugs... showed superiority over placebo in single RCTs [randomized controlled studies], whereas eleven did not: alprazolam, citalopram, desipramine, escitalopram, imipramine, lamotrigine, nefazadone, risperidone, tiagabine and valproate semisodium.”36 | Google Scholar Search: “risperidone PTSD systematic review” |
| 321 | Effect of Increasing Doses of Saw Palmetto Extract on Lower Urinary Tract Symptoms A Randomized Trial  Barry et al. | Urology | 9/28/2011 JAMA | Benign prostatic hyperplasia (BPH), an enlargement of the prostate that often occurs as men age, often causes bothersome symptoms such as frequent urination. Saw palmetto, a supplement known to have anti-androgenic effects, has been reportedly used for this condition as far back as the 1800’s, and it is estimated that as many as 30-90% of patients seen by urologists use phytotherapeutic agents such as saw palmetto.37 A randomized controlled trial investigated the effects of saw palmetto extract (n=176) vs placebo (n=181) on American Urological Association Symptom Index scores in patients with lower urinary tract symptoms attribute to BPH. In patients with BPH, the use of saw palmetto was no better than placebo in reducing lower urinary tract symptoms (group mean difference, 0.79; P=.91). This is a reversal of saw palmetto extract for reducing symptoms of BPH. | 2012. Cochrane review. “Serenoa repens, at double and triple doses, did not improve urinary flow measures or prostate size in men with lower urinary tract symptoms consistent with BPH.”38 | Pubmed found systematic review |
| 322 | Vitamin E and the Risk of Prostate Cancer The Selenium and Vitamin E Cancer Prevention Trial (SELECT)  Klein et al. | Public health/ Preventive medicine | 10/12/2011 JAMA | Due to epidemiological and preclinical evidence that selenium and vitamin E were protective against prostate cancer, the SELECT trial was designed to determine the effect of the supplements on prostate cancer.39 Vitamin E was a popular supplement being used by men in the United States at the time.40 This follow up study of 6-10 years found that, compared with placebo (n=8696), supplementation with Vitamin E alone (n=8737) significantly increased risk of prostate cancer among healthy men (HR, 1.17; 99% CI, 1.004-1.36, P=.008). There were no significant differences in risks of prostate cancer between the placebo group and the selenium group or the Vitamin plus selenium group. This is a reversal of Vitamin E for reducing risk of prostate cancer. | 2013. US Preventive Services Task Force. “Trials of vitamin E supplementation showed mixed results and altogether had no overall effect on cancer, CVD, or all-cause mortality.”41 | Pubmed found systematic review |
| 323 | Enteral Omega-3 Fatty Acid, γ-Linolenic Acid, and Antioxidant Supplementation in Acute Lung Injury  Rice et al. | Pulmonary | 10/12/2011 JAMA | Acute lung injury is a condition where trauma upregulates inflammatory processes, which can disrupt the lung endothelial and epithelial barriers.42 Omega-3 fatty acids such as docosahexaenoic acid (DHA) and eicosapentaenoic acid (EPA) have anti-inflammatory effects and guidelines have suggested their use in patients with acute lung injury.43 Small trials have shown an association between omega-3 and antioxidant supplementation and improved oxygenation and respiratory physiology.44 This study found that, compared to control supplement (n=129), twice daily enteral supplementation of n-3 fatty acids, gamma-linolenic acid, and antioxidants (n=143) did not improve ventilator-free days in patients with acute lung injury. In fact, the study was stopped early due to futility and potential harm. The supplement group had 14.0 ventilator-free days vs 17.2 days in the control group (P=.02). This is a reversal of omega-3 fatty acid, γ-linolenic acid, and antioxidant supplementation for improving outcomes in acute lung injury patients. | 2015. “The pooled results did not show a significant reduction in the risk of all-cause mortality (M-H RR (the overall Mantel-Haenszel relative risk), 0.81 (95% CI, 0.50–1.31); p = 0.38; 6 trials, n = 717) in ALI/ARDS patients treated with the immunomodulatory diet. This treatment also did not extend the ventilator-free days and ICU-free days. However, patients with high mortality might benefit from this treatment. Conclusions: The enteral immunomodulatory diet could not reduce the severity of the patients with ALI/ARDS..”45 | Pubmed found systematic review |
| 324 | Platelet-Rich Plasma Injection for Chronic Achilles Tendinopathy A Randomized Controlled Trial  de Vos et al. | Orthopedic | 1/13/2010 JAMA | Achilles tendinopathy is a tendon disorder that affects many athletes and inactive middle-aged individuals. Platelet-rich plasma injections for tendinopathy were thought to provide growth factors to aid in tissue repair processes46 and the treatment has been used since the 1980s.47 This study determined that platelet-rich plasma injections (n=27) did not improve pain and activity among patients with chronic Achilles tendinopathy who were treated with eccentric exercises compared to a saline injection (n=27). Both groups showed improvement in scores in the Victorian Institute of Sports Assessment-Achilles questionnaire, but there was no significant difference between the two groups (adjusted between-group difference from baseline to 24 weeks, -0.9; 95% CI, -12.4 to 10.6). This is a reversal of platelet-rich plasma injections for chronic Achilles tendinopathy. | 2015. Cochrane review. “There is insufficient evidence from randomised controlled trials to draw conclusions on the use, or to support the routine use, of injection therapies for treating Achilles tendinopathy… Injection therapies include a range of options such as corticosteroids, high-volume saline, prolotherapy, autologous blood, platelet-rich plasma, aprotinin, botulinum toxin, sodium hyaluronate, polysulphated glycosaminoglycan and polidocanol.”48 | Pubmed found systematic review |
| 325 | Corticosteroid Treatment and Intensive Insulin Therapy for Septic Shock in Adults: A Randomized Controlled Trial  The COIITSS Study Investigators | Critical care | 1/27/2010 JAMA | Insulin therapy is used alongside corticosteroid therapy in the treatment of septic shock,49 to normalize blood glucose levels in ICU patients. Some guidelines suggest that continuous intensive insulin treatment to lower glucose levels adds to survival benefit.50 Clinical studies on intensive insulin therapy in patients with septic shock have shown mixed results.51 52 This study found that, compared to conventional insulin therapy (n=254), intensive insulin therapy (n=255) did not improve in-hospital mortality in patients who were treated with hydrocortisone for septic shock (45.9% intensive vs 42.9% conventional; RR, 1.07%; 95% CI, 0.88-1.30; P=.50). This is a reversal of intensive insulin therapy for septic shock. | 2014. “For patients with sepsis, IIT [intensive insulin therapy] and conservative glucose management show similar efficacy, but ITT is associated with a higher incidence of hypoglycemia.”53 | Pubmed found systematic review |
| 326 | Early vs Late Tracheotomy for Prevention of Pneumonia in Mechanically Ventilated Adult ICU Patients: A Randomized Controlled Trial  Terragni et al. | Critical care | 4/21/2010 JAMA | Physicians in the ICU are often required to decide which patients will require prolonged mechanical intubation and if a tracheotomy will be appropriate in those patients. Tracheotomies are an invasive, costly procedure but potentially prevent ventilator-associated pneumonia (VAP) and reduce the length of respiratory support and sedative use. Consensus guidelines recommend late tracheotomy (after 3 weeks of endotracheal intubation),54 and this practice has been widely accepted. In spite of this recommendation, an analysis by the US National Trauma Association reported significant variation in the timing of tracheotomy between ICUs.55 The analysis found that hospitals were performing early tracheotomy on patients despite the lack of confirmatory evidence of benefit from the procedure, leading to costly, prolonged hospital stays. The randomized control trial by Terragni et al., sought to determine the effectiveness of early tracheotomy (n=209) compared with a late tracheotomy (n=210) in reducing the incidence of VAP. The trial found that early tracheotomy performed after 6 to 8 days of endotracheal intubation did not result in a reduced incidence of VAP compared with late tracheotomy performed after 13 to 15 days of endotracheal intubation (14% early vs 21% late; P=.07; HR, 0.66; 95% CI, 0.442-1.04). This is a reversal of early tracheotomy for preventing pneumonia in mechanically ventilated ICU patients. | 2015. Cochrane review. “The whole findings of this systematic review are no more than suggestive of the superiority of early over late tracheostomy because no information of high quality is available for specific subgroups with particular characteristics.”56 | Pubmed found systematic review |
| 327 | Annual High-Dose Oral Vitamin D and Falls and Fractures in Older Women: A Randomized Controlled Trial  Sanders et al. | Public health/ Preventive medicine | 5/12/2010 JAMA | Research on Vitamin D supplementation on falls and fractures has been inconsistent. Meta-analyses have shown that 700-800 IUs of vitamin D reduce fractures by 13-26%,57 while others have found vitamin D supplementation to be ineffective. A Cochrane review reported that there was a non-significant increase in hip fractures associated with D supplementation. Vitamin D supplementation is recommended for adults over 50 years with a fracture.58 59 This double-blind, placebo controlled randomized trial found that women above the 70 years taking high-dose cholecalciferol (n=1131) were at an increased risk of falls and fractures compared to women taking placebo (n=1125). The rate of fractures was 15.2% in the supplement group vs 12% in the placebo group. The rate of falls was 83.4 per 100 person-years in the supplement group vs 72.7 per 100 person-years in the placebo group (incidence rate ratio, 1.15l 95% CI, 1.02-1.30; P=.03) The authors suggest that further research on the safety of high-dose vitamin D supplementation is needed. This is a reversal of high-dose oral Vitamin D in preventing falls and fractures in older women. | 2014. Cochrane review. “Vitamin D alone is unlikely to prevent fractures in the doses and formulations tested so far in older people. Supplements of vitamin D and calcium may prevent hip or any type of fracture. There was a small but significant increase in gastrointestinal symptoms and renal disease associated with vitamin D and calcium. This review found that there was no increased risk of death from taking calcium and vitamin D.”60 | Pubmed found systematic review |
| 328 | Effect of Glucosamine on Pain-Related Disability in Patients With Chronic Low Back Pain and Degenerative Lumbar Osteoarthritis: A Randomized Controlled Trial  Wilkens et al. | Orthopedic | 7/7/2010 JAMA | Nonspecific chronic low back pain (LBP) is one the most prevalent, expensive, and poorly treated conditions seen by primary care clinicians. Treatment approaches are empiric and based on scant evidence. Glucosamine is supplement that is commonly used to treat peripheral joint osteoarthritis (OA).61 A report found that more than 25% of patients with chronic LBP have tried glucosamine supplements, seeking to gain relief for their back pain.62 Wilkens et al. found that after 250 patients with chronic LBP and degenerative lumbar OA were randomized to treatment with daily glucosamine (n=125) or placebo (n=125), pain-related disability did not differ at 6 months (P=.72) or at 1-year follow-up (P=.97). This is a reversal of glucosamine for reducing pain-related disability in patients with chronic LBP and OA. | 2013. “On the basis of the current research, any clinical benefit of oral glucosamine for patients with chronic LBP and radiographic changes of spinal OA can neither be demonstrated nor excluded based on insufficient data and the low quality of existing studies.”63 | Pubmed found systematic review |
| 329 | Elective Intra-aortic Balloon Counterpulsation During High-Risk Percutaneous Coronary Intervention: A Randomized Controlled Trial  Perera et al. | Cardiovascular | 8/25/2010 | Patients with impaired left ventricular function who undergo percutaneous coronary intervention (PCI) are at high risk of cardiogenic shock or death. In these circumstances, patients can be treated by intra-aortic balloon pump (IABP), which augments coronary blood flow and decreases myocardial oxygen demand. IABP insertion is common practice,64 and observational studies have reported fewer intra-procedural complications and reduced major adverse cardiovascular events with prophylactic IABP insertion during high-risk PCI. International guidelines for PCI do not recommend prophylactic IABP, but they suggest that IABP should be used for patients with an extreme hemodynamic compromise.65 The BCIS-1 study aimed to determine whether routine IABP insertion before PCI would effectively reduce major adverse cardiac and cardiovascular events (MACCE) in patients with severe left ventricular dysfunction and extensive coronary disease after 28 days. The investigation found that, compared to no IABP insertion (n=150), elective IABP insertion (n=151) did not reduce the incidence of MACCE following PCI (15.2% elective IABP vs 16.0% no IABP; OR, 0.94; 95% CI, 0.51-1.76; P=.85). This is a reversal of IABP for patients with severe left ventricular dysfunction and extensive coronary disease. | 2016. “The present results do not favor the clinical utility of IABP in patients suffering high-risk PCI without CS and AMI [acute myocardial infarction] complicated with CS [cardiogenic shock].”66 | Pubmed found systematic review |
| 330 | Transfusion Requirements After Cardiac Surgery The TRACS Randomized Controlled Trial  Hajjar et al. | Cardiovascular | 10/13/2010  JAMA | Cardiac surgery often results in the need for blood transfusions, with rates ranging between 30-100%.67 Part of the variation in transfusion practices may be due to the variation in the thresholds in which physicians transfuse. Some have advocated for a more liberal threshold, when hemoglobin concentrations reach 10 g/dL, whereas others have a more restrictive strategy, waiting until hemoglobin concentrations fall as low as 6 g/dL.68 In the TRACS trial, patients who underwent cardiac surgery with cardiopulmonary bypass were randomized to a liberal strategy of blood transfusion (n=253) or a restrictive strategy (n=249). A more restrictive strategy resulted in similar rates of a composite of 30-day mortality and severe morbidity as compared to the more liberal strategy (11% restrictive vs 10% liberal; between group difference, 1%; 95% CI, -6% to 4%; P=.85). This is a reversal of liberal blood transfusions over restrictive after cardiac surgery. | 2016. Cochrane. “Transfusing at a restrictive haemoglobin concentration of between 7 g/dL to 8 g/dL decreased the proportion of participants exposed to RBC transfusion by 43% across a broad range of clinical specialties. There was no evidence that a restrictive transfusion strategy impacts 30-day mortality or morbidity (i.e. mortality at other points, cardiac events, myocardial infarction, stroke, pneumonia, thromboembolism, infection) compared with a liberal transfusion strategy.”69 | Pubmed |
| 331 | Effect of DHA Supplementation During Pregnancy on Maternal Depression and Neurodevelopment of Young Children: A Randomized Controlled Trial  Makrides et al. | Obstetrics/Gynecology | 10/20/2010 JAMA | Several international guidelines recommend that pregnant women increase their dietary docosahexaenoic acid (DHA) intakes.70 71 These recommendations are founded on epidemiological studies from the US and Europe which have associated a higher intake of n-3 long-chain polyunsaturated fatty acids (LCPUFA) from fish and seafood consumption during pregnancy with a reduced risk of postpartum depression and enhanced neurodevelopment for newborns.72 In 2007, Martek Biosciences Corporation, a manufacturer of DHA products, reported revenues of approximately $307 million dollars, and was awarded contracts to supply DHA to Mead Johnson and Abbott to use in infant formulas for cognitive development.73 The DOMInO trial investigated the effect of DHA supplements (n of women=1197; n of infants= 351) on postpartum depression in new mothers and cognitive function in newborns compared to placebo (n of women=1202; n of infants=375). The study found that high levels of depressive symptoms in mothers during the first 6 months postpartum did not differ between the DHA group and the placebo group (9.67% vs 11.19%; adjusted RR, 0.85; 95% CI, 0.70-1.02; P = .09). Mean cognitive composite scores (adjusted mean difference, 0.01; 95% CI, −1.36 to 1.37; P = .99) and language composite scores (adjusted mean difference, −1.42; 95% CI, −3.07 to 0.22; P = .09) did not differ between children of the DHA and placebo groups as well. This is a reversal of DHA for pregnant women for preventing maternal depression and improving neurodevelopment of young children. | 2013. Cochrane review. “There is insufficient evidence to conclude that selenium, DHA or EPA prevent postnatal depression. There is currently no evidence to recommend any other dietary supplement for prevention of postnatal depression.”74  For neurodevelopment of young children: 2017. “The following nine cognition outcomes: attention, behaviour, crystallised intelligence, fluid intelligence, global cognition, memory, motor skills, visual processing, and problem solving were not significantly impacted by nutritional interventions, although 65% of studies conducted post-hoc data analyses and were likely to be underpowered. Although, long chain polyunsaturated fatty acids (LCPUFA) supplementation was associated with a marginal increase in crystallised intelligence (Effect size (ES): 0.25; 95% confidence interval (95% CI): -0.04, 0.53), the effect was not statistically significant (p = 0.09), with significant study heterogeneity (p = 0.00).”75 | Both sources were pubmed-found systematic reviews |
| 332 | Docosahexaenoic Acid Supplementation and Cognitive Decline in Alzheimer Disease: A Randomized Trial  Quinn et al. | Neurology | 11/3/2010 JAMA | Docosahexaenoic acid (DHA), a popular supplement, has been suggested by epidemiological studies to be associated with a reduced incidence of Alzheimer disease.76 In 2007, Martek Biosciences Corporation, a manufacturer of DHA products, reported revenues of approximately $307 million dollars, with some of their products marketed towards cognitive and Alzheimer’s prevention.73 Nutritionists suggested that the consumption of DHA might prevent AD.77 Quinn et al., conducted a multi-center, placebo-controlled randomized trial examining if supplementation of DHA to patients with mild to moderate AD slowed the cognitive and functional decline. The study found that after 18 months of treatment, DHA (n=238) had no beneficial effect on the rate of cognitive decline compared to placebo (n=164). The rate of change in the cognitive subscale of the Alzheimer’s Disease Assessment Scale was an increased mean of 7.98 points (95% CI, 6.51-9.45) in the DHA group and 8.27 points (95% CI, 6.72-9.82) in the placebo group (linear mixed-effects mode: P=.41). This is a reversal of PHA for slowing down cognitive and functional decline in patients with AD. | 2016. Cochrane review. “We found no convincing evidence for the efficacy of omega-3 PUFA supplements in the treatment of mild to moderate AD [Alzheimer’s disease]. This result was consistent for all outcomes relevant for people with dementia. Adverse effects of omega-3 PUFAs seemed to be low, but based on the evidence synthesized in this review, we cannot make a final statement on tolerability. The effects on other populations remain unclear.”78 | Pubmed found systematic review |
| 333 | Efficacy and Safety of Prescription Omega-3 Fatty Acids for the Prevention of Recurrent Symptomatic Atrial Fibrillation: A Randomized Controlled Trial  Kowey et al. | Cardiovascular | 12/1/2010 JAMA | Atrial fibrillation (AF) is prevalent medical condition and patients would benefit from safe and efficient treatment alternatives when standard therapies fail. Multiple trials have suggested that omega-3 polyunsaturated fatty acids may be an effective treatment for AF.79 80 However, evidence supporting the safety and efficacy of omega-3 supplementation has been lacking. As a result of confounding evidence, doctors have different perceptions of what the net clinical benefit may be of omega-3 supplementation consumption to their patients.81 Kowey and colleagues evaluated the safety and efficacy of prescribing omega-3 fatty acids for the prevention of recurrent symptomatic AF. After 24 weeks, there was no difference between treatment group (n=258) and placebo group (n=269) for recurrence of symptomatic AF in patients with paroxysmal AF (HR, 1.15; 95% CI, 0.90-1.46; P=.26). This is a reversal of Omego-3 fatty acids for preventing recurrent symptomatic AF. | 2013.. “Published clinical trials do not support n-3 PUFAs as agents aimed at preventing either postoperative or recurrent AF.”31 | Pubmed found systematic review |
| 334 | Weight Lifting for Women at Risk for Breast Cancer–Related Lymphedema: A Randomized Trial  Schmitz et al. | Oncology | 12/22/2010 + 12/29/2010 JAMA | Lymphedema is a common complication among breast cancer survivors and can cause swelling, discomfort, impaired arm function, and a lower quality of life. Guidelines recommend avoiding weight lifting among breast cancer survivors to reduce risk of lymphedema.82 83 This study found that, compared to no exercise (n=75), a program of slowly progressive weight lifting (n=72) did not increase incidence of lymphedema in breast cancer survivors (intervention vs control, 11% vs 17%; cumulative incidence difference, -6.0%; 95% CI, -17.2% to 5.2%; P for equivalence =.04). Furthermore, weight lifting may have a preventive effect. This is a reversal of avoiding weight lifting for women at risk of breast cancer-related lymphedema. | 2015. Cochrane review. “The evidence suggests that progressive resistance exercise therapy does not increase the risk of developing lymphoedema, provided that symptoms are closely monitored and adequately treated if they occur. Given the degree of heterogeneity encountered, limited precision, and the risk of bias across the included studies, the results of this review should be interpreted with caution.”84 | Pubmed found systematic review |
| 335 | Effect of Selenium and Vitamin E on Risk of Prostate Cancer and Other Cancers The Selenium and Vitamin E Prevention Trial (SELECT)  Lippman et al. | Public health/ Preventive medicine | 1/07/2009 JAMA | Through secondary analyses, randomized controlled trials, and epidemiological studies,85 it was found that selenium and vitamin E supplementation may be protective against certain cancers, including prostate cancer. Vitamin E was a common supplement taken at the time of this study.40 This randomized control study sought to determine if a diet supplementation with Vitamin E and selenium would reduce prostate cancer risk in men. The authors found that selenium (n=8752) or vitamin E (n=8737), alone or in combination (n=8703), did not reduce rates of prostate cancer compared to placebo. The Vitamin E group had a HR of 1.13 (99% CI, 0.95-1.35), selenium had a HR of 1.04 (99% CI, 0.87-1.24), and the combination had a HR of 1.05 (99% CI, 0.88-1.25) compared to placebo. In fact, there were statistically nonsignificant increased risks of prostate cancer (P=.06) in the Vitamin E group and type 2 diabetes mellitus (P=.16) in the Selenium group. This is a reversal of selenium and Vitamin E for reducing risk of prostate in men. | 2014. Cochrane review. “RCTs [randomized controlled trials] assessing the effects of selenium supplementation on cancer risk have yielded inconsistent results, although the most recent studies, characterised by a low risk of bias, found no beneficial effect on cancer risk, more specifically on risk of prostate cancer, as well as little evidence of any influence of baseline selenium status. Rather, some trials suggest harmful effects of selenium exposure.”86  2013. US Preventive Services Task Force. “Trials of vitamin E supplementation showed mixed results and altogether had no overall effect on cancer, CVD, or all-cause mortality.”41 | Pubmed found systematic review |
| 336 | Vitamins E and C in the Prevention of Prostate and Total Cancer in Men The Physicians' Health Study II Randomized Controlled Trial  Gaziano et al. | Public health/ Preventive medicine | 1/07/2009 JAMA | Many people take antioxidant vitamins in the hopes of strengthening their immune system because they are affordable and easily available.87 Vitamin E and C have also been associated with reduced risk of some types of cancer.88 However, trials have reported contradicting information. The HOPE-TOO trial showed no reduction in prostate cancer when given Vitamin E,89 yet the ATBC trial reported a reduction in prostate cancer. In a continuation of the HOPE and HOPE-TOO studies, the present study set out to evaluate whether long-term supplementation of Vitamin E and Vitamin C decreases the risk of prostate and total cancer in male physicians, ages 50 years and older. Compared with placebo (n=7000), Vitamin E (n=6983) showed no effect on incidence of prostate cancer (active vs placebo Vitamin E, 9.1 vs 9.5 events per 1000 person-years; HR, 0.97; 95% CI, 0.85-1.09; P=.58). The active Vitamin E group (n= 7315) and the control Vitamin E group (n=7326) also had similar incidence of total cancer (17.8 vs 17.3 cases/1000 person-years; HR, 1.04; 95% CI, 0.95-1.13; P=.41). Similarly, there was no significant difference between Vitamin C (n=7006) and placebo (n=6977) on incidence of prostate cancer (9.4 vs 9.2 cases/1000 person-years; HR, 1.02; 95% CI, 0.90-1.15; P=.80) and no difference in active Vitamin C (n=7329) and placebo (n=7312) in total cancer (17.6 vs 17.5 cases/1000 person-years; HR, 1.01; 95% CI, 0.92-1.10; P=.86). This is a reversal on Vitamin E and C supplementation for preventing prostate and total cancer in men. | 2013. US Preventive Services Task Force.  “Trials of vitamin E supplementation showed mixed results and altogether had no overall effect on cancer, CVD, or all-cause mortality…. The few studies addressing folic acid, vitamin C, and vitamin A showed no effect on CVD, cancer, and mortality.”41 | Pubmed found systematic review |
| 337 | Cardiac Outcomes After Screening for Asymptomatic Coronary Artery Disease in Patients With Type 2 Diabetes The DIAD Study: A Randomized Controlled Trial  Young et al. | Endocrinology, Diabetes, and Metabolism | 4/15/2009 JAMA | Patients with type 2 diabetes are at a high risk of coronary artery disease (CAD).90 In 1998, an expert panel of the American Diabetes Association recommended that patients with type 2 diabetes who have 2 or more risk factors for CAD be screened for asymptomatic CAD.91-93 The DIAD study compared patients with type 2 diabetes and no symptoms of CAD to screening (n=561) or no screening (n=562) to compare rates of cardiac death of nonfatal myocardial infarction. The rate of cardiac death or nonfatal myocardial MI in the DIAD study did not differ between the screening and no screening groups (2.7% vs 3.0%; HR, 0.88; 95% CI, 0.44-1.88; P= .73). This is a reversal of screening for asymptomatic CAD in patients with type 2 diabetes. | 2016. “The present analysis shows no evidence for a benefit of screening diabetic patients for the presence of asymptomatic CAD. The proportion of patients who undergo myocardial revascularization as a consequence of screening was low.”94 | Pubmed found systematic review |
| 338 | Laparoscopic Uterosacral Nerve Ablation for Alleviating Chronic Pelvic Pain A Randomized Controlled Trial  Daniels et al. | Obstetrics/Gynecology | 9/02/2009 JAMA | Laparoscopy uterosacral nerve ablation (LUNA) is the treatment of chronic pelvic pain and it is increasingly being used.95 96 The LUNA trial randomized patients suffering from chronic pelvic pain to laparoscopy without pelvic denervation (n=192) or LUNA (n=187). There was no significant difference between LUNA and no LUNA in worst pain scores assesses by visual analogue scale (mean difference, -0.04cm; 95% CI, -.33 to 0.35 cm; P=.80), dysmenorrhea (−0.09 cm; 95% CI, −0.49 to 0.30 cm; P = .60), or dyspareunia (0.18 cm; 95% CI, −0.22 to 0.62 cm; P = .40). This is a reversal of LUNA for alleviating chronic pelvic pain. | 2011. “Surgical interruption of pelvic nerve pathways is not beneficial in treating dysmenorrhoea, and may be associated with adverse effects including constipation.”97 | Google scholar search “dysmenorrhoea surgery nerve systematic review” |
| 339 | Effect of High Perioperative Oxygen Fraction on Surgical Site Infection and Pulmonary Complications After Abdominal Surgery The PROXI Randomized Clinical Trial  Meyhoff et al. | Surgery | 10/14/2009 JAMA | The 2007 Global Guidelines for the Prevention of Surgical Site Infection recommends that adult patients undergoing general anesthesia for surgical procedures should receive an 80% fraction of inspired oxygen, (FIO2), intraoperatively and in the immediate postoperative period for 2-6 hours to reduce the risk of surgical site infections (SSI) , if practical.98 A meta-analysis found that perioperative administration of high inspired oxygen (80% concentration) was associated with a 3% absolute reduction and a 25% relative reduction in risk of SSI.99 On the contrary, a trial by Pryor et al. was stopped prematurely for futility, after high inspiratory oxygen fraction (FIO2) during the perioperative period did not reduce the overall incidence of SSI; Instead, the participants experienced several deleterious effects, because the frequency of wound infection was more than doubled in patients randomized to the high FIO2.100 The PROXI trial was designed to assess the benefits and harms of administering a high FIO2 (n=685) compared to low FIO2 (n=701)in a general surgical population of patients undergoing laparotomy. The study found that there was no difference in SSI risk reduction between high and low oxygen groups (19.1% vs 20.1%; OR, 0.94; 95% CI, 0.72-1.22; P=.64). High FIO2 was not associated with a significant increase in the frequency of pulmonary complications or other adverse events. Mortality differences were not statistically significant (P=.13). This is a reversal on administering high preoperative oxygen fraction for preventing surgical site infections for patients undergoing laparotomy. | 2015. Cochrane review. “As the risk of adverse events, including mortality, may be increased by a fraction of inspired oxygen of 60% or higher, and as robust evidence is lacking for a beneficial effect of a fraction of inspired oxygen of 60% or higher on surgical site infection, our overall results suggest that evidence is insufficient to support the routine use of a high fraction of inspired oxygen during anaesthesia and surgery. Given the risk of attrition and outcome reporting bias, as well as other weaknesses in the available evidence, further randomized clinical trials with low risk of bias in all bias domains, including a large sample size and long-term follow-up, are warranted.”101 | Pubmed found systematic review |
[truncated: 444,872 more chars]
